# Supplementary material
Source: Research Square preprint supplement (doi:10.21203/rs.3.rs-9731786/v1)
Supplement: Supplementary file 1 [file c227a8e6290501a0007e9278.xlsx]

## Sheet: O2
Oxgyen measurements from algae mats
March 2024						May 2024
Location : No mat			Location : Below mat			Location : No mat					Location : Below mat
Date & Time	Oxygen		Date & Time	Oxygen		Date	Time	Date & Time	Oxygen		Date	Time	Date & Time	Oxygen
2024-03-26 13:47:45	259.749		2024-03-26 13:33:19	185.524		2024-05-21	11:46:56	2024-05-21 11:46:56	249.566		2024-05-21	10:55:19	2024-05-21 10:55:19	7.126
2024-03-26 13:48:15	262.018		2024-03-26 13:33:49	196.973		2024-05-21	11:47:26	2024-05-21 11:47:26	249.68		2024-05-21	10:55:49	2024-05-21 10:55:49	6.349
2024-03-26 13:48:45	268.042		2024-03-26 13:34:19	191.561		2024-05-21	11:47:56	2024-05-21 11:47:56	252.69		2024-05-21	10:56:19	2024-05-21 10:56:19	5.802
2024-03-26 13:49:15	269.852		2024-03-26 13:34:49	178.98		2024-05-21	11:48:26	2024-05-21 11:48:26	252.724		2024-05-21	10:56:49	2024-05-21 10:56:49	5.206
2024-03-26 13:49:45	274.542		2024-03-26 13:35:19	178.695		2024-05-21	11:48:56	2024-05-21 11:48:56	253.475		2024-05-21	10:57:19	2024-05-21 10:57:19	4.789
2024-03-26 13:50:15	274.073		2024-03-26 13:35:49	178.578		2024-05-21	11:49:26	2024-05-21 11:49:26	257.666		2024-05-21	10:57:49	2024-05-21 10:57:49	4.451
2024-03-26 13:50:45	274.406		2024-03-26 13:36:19	166.401		2024-05-21	11:49:56	2024-05-21 11:49:56	253.974		2024-05-21	10:58:19	2024-05-21 10:58:19	4.056
2024-03-26 13:51:15	274.261		2024-03-26 13:36:49	147.017		2024-05-21	11:50:26	2024-05-21 11:50:26	255.491		2024-05-21	10:58:49	2024-05-21 10:58:49	3.696
2024-03-26 13:51:45	277.434		2024-03-26 13:37:19	137.731		2024-05-21	11:50:56	2024-05-21 11:50:56	256.974		2024-05-21	10:59:19	2024-05-21 10:59:19	3.5
2024-03-26 13:52:15	273.791		2024-03-26 13:37:49	141.082		2024-05-21	11:51:26	2024-05-21 11:51:26	255.683		2024-05-21	10:59:49	2024-05-21 10:59:49	3.274
2024-03-26 13:52:45	273.727		2024-03-26 13:38:19	141.386		2024-05-21	11:51:56	2024-05-21 11:51:56	253.246		2024-05-21	11:00:19	2024-05-21 11:00:19	3.172
2024-03-26 13:53:15	272.323		2024-03-26 13:38:49	145.977		2024-05-21	11:52:26	2024-05-21 11:52:26	253.934		2024-05-21	11:00:49	2024-05-21 11:00:49	3.023
2024-03-26 13:53:45	269.222		2024-03-26 13:39:19	160.185		2024-05-21	11:52:56	2024-05-21 11:52:56	253.795		2024-05-21	11:01:19	2024-05-21 11:01:19	2.87
2024-03-26 13:54:15	267.723		2024-03-26 13:39:49	164.23		2024-05-21	11:53:26	2024-05-21 11:53:26	254.235		2024-05-21	11:01:49	2024-05-21 11:01:49	2.709
2024-03-26 13:54:45	269.257		2024-03-26 13:40:19	152.218		2024-05-21	11:53:56	2024-05-21 11:53:56	252.685		2024-05-21	11:02:19	2024-05-21 11:02:19	2.48
2024-03-26 13:55:15	272.317		2024-03-26 13:40:49	149.446		2024-05-21	11:54:26	2024-05-21 11:54:26	254.399		2024-05-21	11:02:49	2024-05-21 11:02:49	2.234
2024-03-26 13:55:45	261.35		2024-03-26 13:41:19	143.923		2024-05-21	11:54:56	2024-05-21 11:54:56	253.082		2024-05-21	11:03:19	2024-05-21 11:03:19	2.025
2024-03-26 13:56:15	263.396		2024-03-26 13:41:49	145.641		2024-05-21	11:55:26	2024-05-21 11:55:26	249.844		2024-05-21	11:03:49	2024-05-21 11:03:49	1.952
2024-03-26 13:56:45	264.582		2024-03-26 13:42:19	150.513		2024-05-21	11:55:56	2024-05-21 11:55:56	250.753		2024-05-21	11:04:19	2024-05-21 11:04:19	1.996
2024-03-26 13:57:15	266.021		2024-03-26 13:42:49	165.392		2024-05-21	11:56:26	2024-05-21 11:56:26	249.273		2024-05-21	11:04:49	2024-05-21 11:04:49	1.947
2024-03-26 13:57:45	270.674		2024-03-26 13:43:19	176.142		2024-05-21	11:56:56	2024-05-21 11:56:56	249.306		2024-05-21	11:05:19	2024-05-21 11:05:19	1.845
2024-03-26 13:58:15	273.69		2024-03-26 13:43:49	179.23		2024-05-21	11:57:26	2024-05-21 11:57:26	253.381		2024-05-21	11:05:49	2024-05-21 11:05:49	1.851
2024-03-26 13:58:45	266.481		2024-03-26 13:44:19	179.602		2024-05-21	11:57:56	2024-05-21 11:57:56	252.942		2024-05-21	11:06:19	2024-05-21 11:06:19	2.076
2024-03-26 13:59:15	255.876		2024-03-26 13:44:49	147.921		2024-05-21	11:58:26	2024-05-21 11:58:26	252.114		2024-05-21	11:06:49	2024-05-21 11:06:49	2.394
2024-03-26 13:59:45	262.56		2024-03-26 13:45:19	145.301		2024-05-21	11:58:56	2024-05-21 11:58:56	252.971		2024-05-21	11:07:19	2024-05-21 11:07:19	2.433
2024-03-26 14:00:15	264.098		2024-03-26 13:45:49	156.908		2024-05-21	11:59:26	2024-05-21 11:59:26	253.227		2024-05-21	11:07:49	2024-05-21 11:07:49	2.42
2024-03-26 14:00:45	264.255		2024-03-26 13:46:19	165.772		2024-05-21	11:59:56	2024-05-21 11:59:56	253.609		2024-05-21	11:08:19	2024-05-21 11:08:19	2.294
2024-03-26 14:01:15	266.407		2024-03-26 13:46:49	160.835		2024-05-21	12:00:26	2024-05-21 12:00:26	252.529		2024-05-21	11:08:49	2024-05-21 11:08:49	2.313
2024-03-26 14:01:45	260.274		2024-03-26 13:47:19	168.536		2024-05-21	12:00:56	2024-05-21 12:00:56	252.859		2024-05-21	11:09:19	2024-05-21 11:09:19	2.505
2024-03-26 14:02:15	256.28		2024-03-26 13:47:49	171.875		2024-05-21	12:01:26	2024-05-21 12:01:26	253.505		2024-05-21	11:09:49	2024-05-21 11:09:49	2.724
2024-03-26 14:02:45	256.928		2024-03-26 13:48:19	170.772		2024-05-21	12:01:56	2024-05-21 12:01:56	253.465		2024-05-21	11:10:19	2024-05-21 11:10:19	2.816
2024-03-26 14:03:15	263.042		2024-03-26 13:48:49	172.474		2024-05-21	12:02:26	2024-05-21 12:02:26	253.806		2024-05-21	11:10:49	2024-05-21 11:10:49	2.627
2024-03-26 14:03:45	264.027		2024-03-26 13:49:19	165.859		2024-05-21	12:02:56	2024-05-21 12:02:56	254.023		2024-05-21	11:11:19	2024-05-21 11:11:19	2.494
2024-03-26 14:04:15	257.63		2024-03-26 13:49:49	158.748		2024-05-21	12:03:26	2024-05-21 12:03:26	254.059		2024-05-21	11:11:49	2024-05-21 11:11:49	2.456
2024-03-26 14:04:45	255.525		2024-03-26 13:50:19	160.347		2024-05-21	12:03:56	2024-05-21 12:03:56	252.776		2024-05-21	11:12:19	2024-05-21 11:12:19	2.396
2024-03-26 14:05:15	249.126		2024-03-26 13:50:49	159.613		2024-05-21	12:04:26	2024-05-21 12:04:26	252.905		2024-05-21	11:12:49	2024-05-21 11:12:49	2.348
2024-03-26 14:05:45	249.922		2024-03-26 13:51:19	158.093		2024-05-21	12:04:56	2024-05-21 12:04:56	253.146		2024-05-21	11:13:19	2024-05-21 11:13:19	2.293
2024-03-26 14:06:15	250.6		2024-03-26 13:51:49	157.869		2024-05-21	12:05:26	2024-05-21 12:05:26	252.569		2024-05-21	11:13:49	2024-05-21 11:13:49	2.122
2024-03-26 14:06:45	250.705		2024-03-26 13:52:19	135.888		2024-05-21	12:05:56	2024-05-21 12:05:56	252.21		2024-05-21	11:14:19	2024-05-21 11:14:19	2.062
2024-03-26 14:07:15	252.636		2024-03-26 13:52:49	143.609		2024-05-21	12:06:26	2024-05-21 12:06:26	254.477		2024-05-21	11:14:49	2024-05-21 11:14:49	2.093
2024-03-26 14:07:45	254.723		2024-03-26 13:53:19	128.627		2024-05-21	12:06:56	2024-05-21 12:06:56	255.105		2024-05-21	11:15:19	2024-05-21 11:15:19	2.098
2024-03-26 14:08:15	255.4		2024-03-26 13:53:49	128.581		2024-05-21	12:07:26	2024-05-21 12:07:26	254.402		2024-05-21	11:15:49	2024-05-21 11:15:49	2.14
2024-03-26 14:08:45	255.962		2024-03-26 13:54:19	138.581		2024-05-21	12:07:56	2024-05-21 12:07:56	254.841		2024-05-21	11:16:19	2024-05-21 11:16:19	2.205
2024-03-26 14:09:15	253.007		2024-03-26 13:54:49	146.336		2024-05-21	12:08:26	2024-05-21 12:08:26	255.127		2024-05-21	11:16:49	2024-05-21 11:16:49	2.314
2024-03-26 14:09:45	246.585		2024-03-26 13:55:19	149.791		2024-05-21	12:08:56	2024-05-21 12:08:56	254.577		2024-05-21	11:17:19	2024-05-21 11:17:19	2.674
2024-03-26 14:10:15	245.486		2024-03-26 13:55:49	151.386		2024-05-21	12:09:26	2024-05-21 12:09:26	253.486		2024-05-21	11:17:49	2024-05-21 11:17:49	2.862
2024-03-26 14:10:45	248.278		2024-03-26 13:56:19	143.793		2024-05-21	12:09:56	2024-05-21 12:09:56	253.488		2024-05-21	11:18:19	2024-05-21 11:18:19	3.153
2024-03-26 14:11:15	250.144		2024-03-26 13:56:49	153.235		2024-05-21	12:10:26	2024-05-21 12:10:26	252.993		2024-05-21	11:18:49	2024-05-21 11:18:49	3.623
2024-03-26 14:11:45	248.539		2024-03-26 13:57:19	134.439		2024-05-21	12:10:56	2024-05-21 12:10:56	252.964		2024-05-21	11:19:19	2024-05-21 11:19:19	3.922
2024-03-26 14:12:15	247.238		2024-03-26 13:57:49	142.636		2024-05-21	12:11:26	2024-05-21 12:11:26	251.4		2024-05-21	11:19:49	2024-05-21 11:19:49	4.226
2024-03-26 14:12:45	245.976		2024-03-26 13:58:19	155.292		2024-05-21	12:11:56	2024-05-21 12:11:56	254.676		2024-05-21	11:20:19	2024-05-21 11:20:19	4.505
2024-03-26 14:13:15	243.248		2024-03-26 13:58:49	150.381		2024-05-21	12:12:26	2024-05-21 12:12:26	252.376		2024-05-21	11:20:49	2024-05-21 11:20:49	4.618
2024-03-26 14:13:45	248.08		2024-03-26 13:59:19	157.926		2024-05-21	12:12:56	2024-05-21 12:12:56	252.22		2024-05-21	11:21:19	2024-05-21 11:21:19	4.763
2024-03-26 14:14:15	245.179		2024-03-26 13:59:49	155.381		2024-05-21	12:13:26	2024-05-21 12:13:26	251.729		2024-05-21	11:21:49	2024-05-21 11:21:49	4.821
2024-03-26 14:14:45	237.803		2024-03-26 14:00:19	153.444		2024-05-21	12:13:56	2024-05-21 12:13:56	251.72		2024-05-21	11:22:19	2024-05-21 11:22:19	4.818
2024-03-26 14:15:15	234.88		2024-03-26 14:00:49	151.307		2024-05-21	12:14:26	2024-05-21 12:14:26	249.655		2024-05-21	11:22:49	2024-05-21 11:22:49	4.754
2024-03-26 14:15:45	237.217		2024-03-26 14:01:19	136.815		2024-05-21	12:14:56	2024-05-21 12:14:56	249.892		2024-05-21	11:23:19	2024-05-21 11:23:19	4.829
2024-03-26 14:16:15	241.032		2024-03-26 14:01:49	141.424		2024-05-21	12:15:26	2024-05-21 12:15:26	249.657		2024-05-21	11:23:49	2024-05-21 11:23:49	4.939
2024-03-26 14:16:45	241.405		2024-03-26 14:02:19	161.871		2024-05-21	12:15:56	2024-05-21 12:15:56	247.552		2024-05-21	11:24:19	2024-05-21 11:24:19	4.989
2024-03-26 14:17:15	246.048		2024-03-26 14:02:49	165.876		2024-05-21	12:16:26	2024-05-21 12:16:26	252.283		2024-05-21	11:24:49	2024-05-21 11:24:49	4.844
2024-03-26 14:17:45	239.792		2024-03-26 14:03:19	168.738		2024-05-21	12:16:56	2024-05-21 12:16:56	254.823		2024-05-21	11:25:19	2024-05-21 11:25:19	4.718
2024-03-26 14:18:15	238.952		2024-03-26 14:03:49	179.6		2024-05-21	12:17:26	2024-05-21 12:17:26	254.236		2024-05-21	11:25:49	2024-05-21 11:25:49	4.465
2024-03-26 14:18:45	246.558		2024-03-26 14:04:19	178.988		2024-05-21	12:17:56	2024-05-21 12:17:56	252.577		2024-05-21	11:26:19	2024-05-21 11:26:19	4.21
2024-03-26 14:19:15	237.033		2024-03-26 14:04:49	177.679		2024-05-21	12:18:26	2024-05-21 12:18:26	252.038		2024-05-21	11:26:49	2024-05-21 11:26:49	4.001
2024-03-26 14:19:45	236.361		2024-03-26 14:05:19	176.859		2024-05-21	12:18:56	2024-05-21 12:18:56	253.592		2024-05-21	11:27:19	2024-05-21 11:27:19	3.834
2024-03-26 14:20:15	233.095		2024-03-26 14:05:49	177.544		2024-05-21	12:19:26	2024-05-21 12:19:26	253.466		2024-05-21	11:27:49	2024-05-21 11:27:49	3.704
2024-03-26 14:20:45	235.094		2024-03-26 14:06:19	169.05		2024-05-21	12:19:56	2024-05-21 12:19:56	251.821		2024-05-21	11:28:19	2024-05-21 11:28:19	3.62
2024-03-26 14:21:15	235.672		2024-03-26 14:06:49	166.527		2024-05-21	12:20:26	2024-05-21 12:20:26	253.989		2024-05-21	11:28:49	2024-05-21 11:28:49	3.486
2024-03-26 14:21:45	239.753		2024-03-26 14:07:19	170.112		2024-05-21	12:20:56	2024-05-21 12:20:56	253.079		2024-05-21	11:29:19	2024-05-21 11:29:19	3.258
2024-03-26 14:22:15	237.778		2024-03-26 14:07:49	164.87		2024-05-21	12:21:26	2024-05-21 12:21:26	253.763		2024-05-21	11:29:49	2024-05-21 11:29:49	3.008
2024-03-26 14:22:45	240.708		2024-03-26 14:08:19	166.106		2024-05-21	12:21:56	2024-05-21 12:21:56	252.332		2024-05-21	11:30:19	2024-05-21 11:30:19	2.888
2024-03-26 14:23:15	236.94		2024-03-26 14:08:49	170.56		2024-05-21	12:22:26	2024-05-21 12:22:26	253.256		2024-05-21	11:30:49	2024-05-21 11:30:49	2.781
2024-03-26 14:23:45	237.053		2024-03-26 14:09:19	150.882		2024-05-21	12:22:56	2024-05-21 12:22:56	251.455		2024-05-21	11:31:19	2024-05-21 11:31:19	2.671
2024-03-26 14:24:15	237.2		2024-03-26 14:09:49	144.474		2024-05-21	12:23:26	2024-05-21 12:23:26	253.306		2024-05-21	11:31:49	2024-05-21 11:31:49	2.612
2024-03-26 14:24:45	238.966		2024-03-26 14:10:19	147.354		2024-05-21	12:23:56	2024-05-21 12:23:56	250.034		2024-05-21	11:32:19	2024-05-21 11:32:19	2.512
2024-03-26 14:25:15	235.364		2024-03-26 14:10:49	150.979		2024-05-21	12:24:26	2024-05-21 12:24:26	255.388		2024-05-21	11:32:49	2024-05-21 11:32:49	2.444
2024-03-26 14:25:45	242.175		2024-03-26 14:11:19	156.753		2024-05-21	12:24:56	2024-05-21 12:24:56	254.677		2024-05-21	11:33:19	2024-05-21 11:33:19	2.404
2024-03-26 14:26:15	245.563		2024-03-26 14:11:49	174.108		2024-05-21	12:25:26	2024-05-21 12:25:26	248.565		2024-05-21	11:33:49	2024-05-21 11:33:49	2.311
2024-03-26 14:26:45	238.612		2024-03-26 14:12:19	176.99		2024-05-21	12:25:56	2024-05-21 12:25:56	250.023		2024-05-21	11:34:19	2024-05-21 11:34:19	2.289
2024-03-26 14:27:15	239.739		2024-03-26 14:12:49	194.006		2024-05-21	12:26:26	2024-05-21 12:26:26	253.428		2024-05-21	11:34:49	2024-05-21 11:34:49	2.332
2024-03-26 14:27:45	243.079		2024-03-26 14:13:19	202.485		2024-05-21	12:26:56	2024-05-21 12:26:56	253.871		2024-05-21	11:35:19	2024-05-21 11:35:19	2.306
2024-03-26 14:28:15	239.377		2024-03-26 14:13:49	184.39		2024-05-21	12:27:26	2024-05-21 12:27:26	256.988		2024-05-21	11:35:49	2024-05-21 11:35:49	2.458
2024-03-26 14:28:45	237.998		2024-03-26 14:14:19	212.356		2024-05-21	12:27:56	2024-05-21 12:27:56	255.584		2024-05-21	11:36:19	2024-05-21 11:36:19	2.599
2024-03-26 14:29:15	236.911		2024-03-26 14:14:49	207.342		2024-05-21	12:28:26	2024-05-21 12:28:26	254.91		2024-05-21	11:36:49	2024-05-21 11:36:49	2.847
2024-03-26 14:29:45	238.187		2024-03-26 14:15:19	202.4		2024-05-21	12:28:56	2024-05-21 12:28:56	254.86		2024-05-21	11:37:19	2024-05-21 11:37:19	3.009
2024-03-26 14:30:15	238.262		2024-03-26 14:15:49	186.152		2024-05-21	12:29:26	2024-05-21 12:29:26	255.364		2024-05-21	11:37:49	2024-05-21 11:37:49	3.284
2024-03-26 14:30:45	231.074		2024-03-26 14:16:19	201.363		2024-05-21	12:29:56	2024-05-21 12:29:56	254.247		2024-05-21	11:38:19	2024-05-21 11:38:19	3.485
2024-03-26 14:31:15	231.854		2024-03-26 14:16:49	206.645		2024-05-21	12:30:26	2024-05-21 12:30:26	254.671		2024-05-21	11:38:49	2024-05-21 11:38:49	3.589
2024-03-26 14:31:45	232.249		2024-03-26 14:17:19	215.834		2024-05-21	12:30:56	2024-05-21 12:30:56	255.517		2024-05-21	11:39:19	2024-05-21 11:39:19	3.739
2024-03-26 14:32:15	231.554		2024-03-26 14:17:49	215.32		2024-05-21	12:31:26	2024-05-21 12:31:26	254.612		2024-05-21	11:39:49	2024-05-21 11:39:49	3.73
2024-03-26 14:32:45	237.169		2024-03-26 14:18:19	212.904		2024-05-21	12:31:56	2024-05-21 12:31:56	253.3		2024-05-21	11:40:19	2024-05-21 11:40:19	3.774
2024-03-26 14:33:15	232.146		2024-03-26 14:18:49	219.008		2024-05-21	12:32:26	2024-05-21 12:32:26	255.637		2024-05-21	11:40:49	2024-05-21 11:40:49	3.851
2024-03-26 14:33:45	235.456		2024-03-26 14:19:19	216.982		2024-05-21	12:32:56	2024-05-21 12:32:56	255.386		2024-05-21	11:41:19	2024-05-21 11:41:19	3.892
2024-03-26 14:34:15	236.663		2024-03-26 14:19:49	210.253		2024-05-21	12:33:26	2024-05-21 12:33:26	254.491		2024-05-21	11:41:49	2024-05-21 11:41:49	3.72
2024-03-26 14:34:45	234.633		2024-03-26 14:20:19	209.817		2024-05-21	12:33:56	2024-05-21 12:33:56	258.357		2024-05-21	11:42:19	2024-05-21 11:42:19	3.565
2024-03-26 14:35:15	236.462		2024-03-26 14:20:49	190.051		2024-05-21	12:34:26	2024-05-21 12:34:26	258.354		2024-05-21	11:42:49	2024-05-21 11:42:49	3.563
2024-03-26 14:35:45	232.916		2024-03-26 14:21:19	190.592		2024-05-21	12:34:56	2024-05-21 12:34:56	258.524		2024-05-21	11:43:19	2024-05-21 11:43:19	3.518
2024-03-26 14:36:15	234.098		2024-03-26 14:21:49	198.946		2024-05-21	12:35:26	2024-05-21 12:35:26	257.764		2024-05-21	11:43:49	2024-05-21 11:43:49	3.429
2024-03-26 14:36:45	233.445		2024-03-26 14:22:19	205.034		2024-05-21	12:35:56	2024-05-21 12:35:56	257.281		2024-05-21	11:44:19	2024-05-21 11:44:19	3.394
2024-03-26 14:37:15	234.426		2024-03-26 14:22:49	186.567		2024-05-21	12:36:26	2024-05-21 12:36:26	255.073		2024-05-21	11:44:49	2024-05-21 11:44:49	3.646
2024-03-26 14:37:45	240.951		2024-03-26 14:23:19	193.942		2024-05-21	12:36:56	2024-05-21 12:36:56	256.474		2024-05-21	11:45:19	2024-05-21 11:45:19	4.554
2024-03-26 14:38:15	238.052		2024-03-26 14:23:49	198.489		2024-05-21	12:37:26	2024-05-21 12:37:26	255.002		2024-05-21	11:45:49	2024-05-21 11:45:49	5.442
2024-03-26 14:38:45	236.336		2024-03-26 14:24:19	200.972		2024-05-21	12:37:56	2024-05-21 12:37:56	253.852		2024-05-21	11:46:19	2024-05-21 11:46:19	6.109
2024-03-26 14:39:15	236.059		2024-03-26 14:24:49	203.555		2024-05-21	12:38:26	2024-05-21 12:38:26	253.976		2024-05-21	11:46:49	2024-05-21 11:46:49	6.644
2024-03-26 14:39:45	233.208		2024-03-26 14:25:19	196.971		2024-05-21	12:38:56	2024-05-21 12:38:56	251.572		2024-05-21	11:47:19	2024-05-21 11:47:19	6.674
2024-03-26 14:40:15	239.404		2024-03-26 14:25:49	196.312		2024-05-21	12:39:26	2024-05-21 12:39:26	253.308		2024-05-21	11:47:49	2024-05-21 11:47:49	6.76
2024-03-26 14:40:45	238.572		2024-03-26 14:26:19	205.028		2024-05-21	12:39:56	2024-05-21 12:39:56	256.3		2024-05-21	11:48:19	2024-05-21 11:48:19	6.76
2024-03-26 14:41:15	235.78		2024-03-26 14:26:49	174.434		2024-05-21	12:40:26	2024-05-21 12:40:26	256.065		2024-05-21	11:48:49	2024-05-21 11:48:49	6.508
2024-03-26 14:41:45	236.066		2024-03-26 14:27:19	145.787		2024-05-21	12:40:56	2024-05-21 12:40:56	253.278		2024-05-21	11:49:19	2024-05-21 11:49:19	6.209
2024-03-26 14:42:15	233.767		2024-03-26 14:27:49	149.657		2024-05-21	12:41:26	2024-05-21 12:41:26	255.329		2024-05-21	11:49:49	2024-05-21 11:49:49	5.892
2024-03-26 14:42:45	233.286		2024-03-26 14:28:19	166.606		2024-05-21	12:41:56	2024-05-21 12:41:56	256.351		2024-05-21	11:50:19	2024-05-21 11:50:19	5.65
2024-03-26 14:43:15	237.928		2024-03-26 14:28:49	173.762		2024-05-21	12:42:26	2024-05-21 12:42:26	256.07		2024-05-21	11:50:49	2024-05-21 11:50:49	5.325
2024-03-26 14:43:45	236.251		2024-03-26 14:29:19	196.066		2024-05-21	12:42:56	2024-05-21 12:42:56	254.387		2024-05-21	11:51:19	2024-05-21 11:51:19	4.967
2024-03-26 14:44:15	238.674		2024-03-26 14:29:49	189.078		2024-05-21	12:43:26	2024-05-21 12:43:26	254.754		2024-05-21	11:51:49	2024-05-21 11:51:49	4.938
2024-03-26 14:44:45	233.698		2024-03-26 14:30:19	196.128		2024-05-21	12:43:56	2024-05-21 12:43:56	253.933		2024-05-21	11:52:19	2024-05-21 11:52:19	5.083
2024-03-26 14:45:15	233.935		2024-03-26 14:30:49	203.492		2024-05-21	12:44:26	2024-05-21 12:44:26	256.094		2024-05-21	11:52:49	2024-05-21 11:52:49	4.996
2024-03-26 14:45:45	233.243		2024-03-26 14:31:19	214.424		2024-05-21	12:44:56	2024-05-21 12:44:56	256.002		2024-05-21	11:53:19	2024-05-21 11:53:19	4.849
2024-03-26 14:46:15	231.299		2024-03-26 14:31:49	210.391		2024-05-21	12:45:26	2024-05-21 12:45:26	254.94		2024-05-21	11:53:49	2024-05-21 11:53:49	4.763
2024-03-26 14:46:45	234.478		2024-03-26 14:32:19	213.152		2024-05-21	12:45:56	2024-05-21 12:45:56	255.579		2024-05-21	11:54:19	2024-05-21 11:54:19	4.655
2024-03-26 14:47:15	231.425		2024-03-26 14:32:49	216.195		2024-05-21	12:46:26	2024-05-21 12:46:26	251.005		2024-05-21	11:54:49	2024-05-21 11:54:49	4.542
2024-03-26 14:47:45	231.357		2024-03-26 14:33:19	212.681		2024-05-21	12:46:56	2024-05-21 12:46:56	254.516		2024-05-21	11:55:19	2024-05-21 11:55:19	4.467
2024-03-26 14:48:15	228.341		2024-03-26 14:33:49	212.264		2024-05-21	12:47:26	2024-05-21 12:47:26	254.234		2024-05-21	11:55:49	2024-05-21 11:55:49	4.434
2024-03-26 14:48:45	234.282		2024-03-26 14:34:19	212.185		2024-05-21	12:47:56	2024-05-21 12:47:56	252.739		2024-05-21	11:56:19	2024-05-21 11:56:19	4.525
2024-03-26 14:49:15	230.455		2024-03-26 14:34:49	211.8		2024-05-21	12:48:26	2024-05-21 12:48:26	248.067		2024-05-21	11:56:49	2024-05-21 11:56:49	4.638
2024-03-26 14:49:45	230.906		2024-03-26 14:35:19	208.855		2024-05-21	12:48:56	2024-05-21 12:48:56	252.203		2024-05-21	11:57:19	2024-05-21 11:57:19	4.604
2024-03-26 14:50:15	234.725		2024-03-26 14:35:49	204.98		2024-05-21	12:49:26	2024-05-21 12:49:26	251.514		2024-05-21	11:57:49	2024-05-21 11:57:49	4.972
2024-03-26 14:50:45	235.495		2024-03-26 14:36:19	213.471		2024-05-21	12:49:56	2024-05-21 12:49:56	251.212		2024-05-21	11:58:19	2024-05-21 11:58:19	5.677
2024-03-26 14:51:15	233.372		2024-03-26 14:36:49	199.856		2024-05-21	12:50:26	2024-05-21 12:50:26	255.75		2024-05-21	11:58:49	2024-05-21 11:58:49	6.088
2024-03-26 14:51:45	236.222		2024-03-26 14:37:19	198.672		2024-05-21	12:50:56	2024-05-21 12:50:56	255.942		2024-05-21	11:59:19	2024-05-21 11:59:19	6.719
2024-03-26 14:52:15	233.638		2024-03-26 14:37:49	209.558		2024-05-21	12:51:26	2024-05-21 12:51:26	253.394		2024-05-21	11:59:49	2024-05-21 11:59:49	7.223
2024-03-26 14:52:45	237.214		2024-03-26 14:38:19	204.523		2024-05-21	12:51:56	2024-05-21 12:51:56	248.383		2024-05-21	12:00:19	2024-05-21 12:00:19	7.26
2024-03-26 14:53:15	233.728		2024-03-26 14:38:49	201.147		2024-05-21	12:52:26	2024-05-21 12:52:26	253.921		2024-05-21	12:00:49	2024-05-21 12:00:49	7.043
2024-03-26 14:53:45	233.743		2024-03-26 14:39:19	202.745		2024-05-21	12:52:56	2024-05-21 12:52:56	255.836		2024-05-21	12:01:19	2024-05-21 12:01:19	6.76
2024-03-26 14:54:15	234.836		2024-03-26 14:39:49	198.696		2024-05-21	12:53:26	2024-05-21 12:53:26	255.645		2024-05-21	12:01:49	2024-05-21 12:01:49	6.431
2024-03-26 14:54:45	233.632		2024-03-26 14:40:19	181.378		2024-05-21	12:53:56	2024-05-21 12:53:56	254.447		2024-05-21	12:02:19	2024-05-21 12:02:19	6.495
2024-03-26 14:55:15	235.487		2024-03-26 14:40:49	194.594		2024-05-21	12:54:26	2024-05-21 12:54:26	249.94		2024-05-21	12:02:49	2024-05-21 12:02:49	6.714
2024-03-26 14:55:45	234.108		2024-03-26 14:41:19	232.428		2024-05-21	12:54:56	2024-05-21 12:54:56	256.269		2024-05-21	12:03:19	2024-05-21 12:03:19	7.317
2024-03-26 14:56:15	233.381		2024-03-26 14:41:49	249.421		2024-05-21	12:55:26	2024-05-21 12:55:26	253.916		2024-05-21	12:03:49	2024-05-21 12:03:49	7.701
2024-03-26 14:56:45	231.237		2024-03-26 14:42:19	228.993		2024-05-21	12:55:56	2024-05-21 12:55:56	256.035		2024-05-21	12:04:19	2024-05-21 12:04:19	7.786
2024-03-26 14:57:15	233.528		2024-03-26 14:42:49	211.442		2024-05-21	12:56:26	2024-05-21 12:56:26	255.841		2024-05-21	12:04:49	2024-05-21 12:04:49	7.652
2024-03-26 14:57:45	233.188		2024-03-26 14:43:19	205.182		2024-05-21	12:56:56	2024-05-21 12:56:56	255.831		2024-05-21	12:05:19	2024-05-21 12:05:19	7.543
2024-03-26 14:58:15	232.015		2024-03-26 14:43:49	194.617		2024-05-21	12:57:26	2024-05-21 12:57:26	256.663		2024-05-21	12:05:49	2024-05-21 12:05:49	7.692
2024-03-26 14:58:45	232.004		2024-03-26 14:44:19	190.683		2024-05-21	12:57:56	2024-05-21 12:57:56	255.851		2024-05-21	12:06:19	2024-05-21 12:06:19	7.748
2024-03-26 14:59:15	233.386		2024-03-26 14:44:49	183.36		2024-05-21	12:58:26	2024-05-21 12:58:26	255.063		2024-05-21	12:06:49	2024-05-21 12:06:49	7.739
2024-03-26 14:59:45	233.229		2024-03-26 14:45:19	180.577		2024-05-21	12:58:56	2024-05-21 12:58:56	254.724		2024-05-21	12:07:19	2024-05-21 12:07:19	7.798
2024-03-26 15:00:15	246.278		2024-03-26 14:45:49	187.64		2024-05-21	12:59:26	2024-05-21 12:59:26	254.565		2024-05-21	12:07:49	2024-05-21 12:07:49	8.145
2024-03-26 15:00:45	237.382		2024-03-26 14:46:19	174.606		2024-05-21	12:59:56	2024-05-21 12:59:56	255.176		2024-05-21	12:08:19	2024-05-21 12:08:19	8.392
2024-03-26 15:01:15	233.191		2024-03-26 14:46:49	161.811		2024-05-21	13:00:26	2024-05-21 13:00:26	247.449		2024-05-21	12:08:49	2024-05-21 12:08:49	8.962
2024-03-26 15:01:45	232.196		2024-03-26 14:47:19	161.711		2024-05-21	13:00:56	2024-05-21 13:00:56	244.732		2024-05-21	12:09:19	2024-05-21 12:09:19	9.902
2024-03-26 15:02:15	230.266		2024-03-26 14:47:49	164.183		2024-05-21	13:01:26	2024-05-21 13:01:26	246.159		2024-05-21	12:09:49	2024-05-21 12:09:49	10.092
2024-03-26 15:02:45	230.45		2024-03-26 14:48:19	167.989		2024-05-21	13:01:56	2024-05-21 13:01:56	245.076		2024-05-21	12:10:19	2024-05-21 12:10:19	9.982
2024-03-26 15:03:15	231.081		2024-03-26 14:48:49	167.116		2024-05-21	13:02:26	2024-05-21 13:02:26	245.544		2024-05-21	12:10:49	2024-05-21 12:10:49	9.837
2024-03-26 15:03:45	233.147		2024-03-26 14:49:19	176.374		2024-05-21	13:02:56	2024-05-21 13:02:56	244.76		2024-05-21	12:11:19	2024-05-21 12:11:19	9.707
2024-03-26 15:04:15	233.748		2024-03-26 14:49:49	178.344		2024-05-21	13:03:26	2024-05-21 13:03:26	245.652		2024-05-21	12:11:49	2024-05-21 12:11:49	9.351
2024-03-26 15:04:45	234.064		2024-03-26 14:50:19	161.209		2024-05-21	13:03:56	2024-05-21 13:03:56	246.632		2024-05-21	12:12:19	2024-05-21 12:12:19	9.42
2024-03-26 15:05:15	233.646		2024-03-26 14:50:49	150.665		2024-05-21	13:04:26	2024-05-21 13:04:26	245.295		2024-05-21	12:12:49	2024-05-21 12:12:49	9.328
2024-03-26 15:05:45	233.833		2024-03-26 14:51:19	159.736		2024-05-21	13:04:56	2024-05-21 13:04:56	248.796		2024-05-21	12:13:19	2024-05-21 12:13:19	9.23
2024-03-26 15:06:15	234.214		2024-03-26 14:51:49	161.107		2024-05-21	13:05:26	2024-05-21 13:05:26	247.219		2024-05-21	12:13:49	2024-05-21 12:13:49	9.43
2024-03-26 15:06:45	231.402		2024-03-26 14:52:19	167.565		2024-05-21	13:05:56	2024-05-21 13:05:56	248.863		2024-05-21	12:14:19	2024-05-21 12:14:19	9.333
2024-03-26 15:07:15	234.719		2024-03-26 14:52:49	179.812		2024-05-21	13:06:26	2024-05-21 13:06:26	245.73		2024-05-21	12:14:49	2024-05-21 12:14:49	8.954
2024-03-26 15:07:45	232.935		2024-03-26 14:53:19	185.912		2024-05-21	13:06:56	2024-05-21 13:06:56	251.84		2024-05-21	12:15:19	2024-05-21 12:15:19	8.507
2024-03-26 15:08:15	234.115		2024-03-26 14:53:49	184.028		2024-05-21	13:07:26	2024-05-21 13:07:26	250.131		2024-05-21	12:15:49	2024-05-21 12:15:49	8.286
2024-03-26 15:08:45	232.798		2024-03-26 14:54:19	182.653		2024-05-21	13:07:56	2024-05-21 13:07:56	250.674		2024-05-21	12:16:19	2024-05-21 12:16:19	8.024
2024-03-26 15:09:15	233.231		2024-03-26 14:54:49	166.81		2024-05-21	13:08:26	2024-05-21 13:08:26	252.179		2024-05-21	12:16:49	2024-05-21 12:16:49	7.704
2024-03-26 15:09:45	234.508		2024-03-26 14:55:19	165.384		2024-05-21	13:08:56	2024-05-21 13:08:56	251.06		2024-05-21	12:17:19	2024-05-21 12:17:19	7.711
2024-03-26 15:10:15	236.61		2024-03-26 14:55:49	166.4		2024-05-21	13:09:26	2024-05-21 13:09:26	249.055		2024-05-21	12:17:49	2024-05-21 12:17:49	7.735
2024-03-26 15:10:45	234.704		2024-03-26 14:56:19	163.178		2024-05-21	13:09:56	2024-05-21 13:09:56	250.278		2024-05-21	12:18:19	2024-05-21 12:18:19	7.803
2024-03-26 15:11:15	232.549		2024-03-26 14:56:49	154.922		2024-05-21	13:10:26	2024-05-21 13:10:26	252.503		2024-05-21	12:18:49	2024-05-21 12:18:49	7.716
2024-03-26 15:11:45	234.511		2024-03-26 14:57:19	151.371		2024-05-21	13:10:56	2024-05-21 13:10:56	247.496		2024-05-21	12:19:19	2024-05-21 12:19:19	7.918
2024-03-26 15:12:15	234.564		2024-03-26 14:57:49	139.093		2024-05-21	13:11:26	2024-05-21 13:11:26	252.874		2024-05-21	12:19:49	2024-05-21 12:19:49	8.23
2024-03-26 15:12:45	235.716		2024-03-26 14:58:19	136.433		2024-05-21	13:11:56	2024-05-21 13:11:56	254.198		2024-05-21	12:20:19	2024-05-21 12:20:19	8.501
2024-03-26 15:13:15	232.968		2024-03-26 14:58:49	136.538		2024-05-21	13:12:26	2024-05-21 13:12:26	253.462		2024-05-21	12:20:49	2024-05-21 12:20:49	8.558
2024-03-26 15:13:45	233.542		2024-03-26 14:59:19	135.432		2024-05-21	13:12:56	2024-05-21 13:12:56	252.382		2024-05-21	12:21:19	2024-05-21 12:21:19	8.495
2024-03-26 15:14:15	237.433		2024-03-26 14:59:49	138.857		2024-05-21	13:13:26	2024-05-21 13:13:26	250.221		2024-05-21	12:21:49	2024-05-21 12:21:49	8.202
2024-03-26 15:14:45	234.117		2024-03-26 15:00:19	138.669		2024-05-21	13:13:56	2024-05-21 13:13:56	245.53		2024-05-21	12:22:19	2024-05-21 12:22:19	7.968
2024-03-26 15:15:15	234.982		2024-03-26 15:00:49	139.333		2024-05-21	13:14:26	2024-05-21 13:14:26	249.941		2024-05-21	12:22:49	2024-05-21 12:22:49	7.761
2024-03-26 15:15:45	231.831		2024-03-26 15:01:19	140.193		2024-05-21	13:14:56	2024-05-21 13:14:56	248.69		2024-05-21	12:23:19	2024-05-21 12:23:19	7.501
2024-03-26 15:16:15	232.308		2024-03-26 15:01:49	137.611		2024-05-21	13:15:26	2024-05-21 13:15:26	247.667		2024-05-21	12:23:49	2024-05-21 12:23:49	7.133
2024-03-26 15:16:45	230.398		2024-03-26 15:02:19	137.635		2024-05-21	13:15:56	2024-05-21 13:15:56	248.634		2024-05-21	12:24:19	2024-05-21 12:24:19	6.773
2024-03-26 15:17:15	230.316		2024-03-26 15:02:49	139.855		2024-05-21	13:16:26	2024-05-21 13:16:26	243.995		2024-05-21	12:24:49	2024-05-21 12:24:49	6.657
2024-03-26 15:17:45	226.446		2024-03-26 15:03:19	142.562		2024-05-21	13:16:56	2024-05-21 13:16:56	248.402		2024-05-21	12:25:19	2024-05-21 12:25:19	6.562
2024-03-26 15:18:15	231.114		2024-03-26 15:03:49	150.537		2024-05-21	13:17:26	2024-05-21 13:17:26	247.696		2024-05-21	12:25:49	2024-05-21 12:25:49	6.405
2024-03-26 15:18:45	230.613		2024-03-26 15:04:19	153.878		2024-05-21	13:17:56	2024-05-21 13:17:56	250.027		2024-05-21	12:26:19	2024-05-21 12:26:19	6.204
2024-03-26 15:19:15	231.746		2024-03-26 15:04:49	141.204		2024-05-21	13:18:26	2024-05-21 13:18:26	249.211		2024-05-21	12:26:49	2024-05-21 12:26:49	6.023
2024-03-26 15:19:45	227.999		2024-03-26 15:05:19	143.06		2024-05-21	13:18:56	2024-05-21 13:18:56	248.547		2024-05-21	12:27:19	2024-05-21 12:27:19	5.812
2024-03-26 15:20:15	225.064		2024-03-26 15:05:49	144.225		2024-05-21	13:19:26	2024-05-21 13:19:26	242.503		2024-05-21	12:27:49	2024-05-21 12:27:49	5.528
2024-03-26 15:20:45	229.033		2024-03-26 15:06:19	146.749		2024-05-21	13:19:56	2024-05-21 13:19:56	249.055		2024-05-21	12:28:19	2024-05-21 12:28:19	5.204
2024-03-26 15:21:15	233.909		2024-03-26 15:06:49	147.108		2024-05-21	13:20:26	2024-05-21 13:20:26	247.125		2024-05-21	12:28:49	2024-05-21 12:28:49	4.917
2024-03-26 15:21:45	226.505		2024-03-26 15:07:19	147.61		2024-05-21	13:20:56	2024-05-21 13:20:56	246.422		2024-05-21	12:29:19	2024-05-21 12:29:19	4.764
2024-03-26 15:22:15	226.057		2024-03-26 15:07:49	149.068		2024-05-21	13:21:26	2024-05-21 13:21:26	246.127		2024-05-21	12:29:49	2024-05-21 12:29:49	4.702
2024-03-26 15:22:45	229.084		2024-03-26 15:08:19	152.887		2024-05-21	13:21:56	2024-05-21 13:21:56	247.672		2024-05-21	12:30:19	2024-05-21 12:30:19	4.583
2024-03-26 15:23:15	228.356		2024-03-26 15:08:49	153.759		2024-05-21	13:22:26	2024-05-21 13:22:26	249.88		2024-05-21	12:30:49	2024-05-21 12:30:49	4.459
2024-03-26 15:23:45	228.754		2024-03-26 15:09:19	149.718		2024-05-21	13:22:56	2024-05-21 13:22:56	252.396		2024-05-21	12:31:19	2024-05-21 12:31:19	4.298
2024-03-26 15:24:15	227.816		2024-03-26 15:09:49	143.36		2024-05-21	13:23:26	2024-05-21 13:23:26	248.222		2024-05-21	12:31:49	2024-05-21 12:31:49	4.115
2024-03-26 15:24:45	224.034		2024-03-26 15:10:19	139.46		2024-05-21	13:23:56	2024-05-21 13:23:56	253.186		2024-05-21	12:32:19	2024-05-21 12:32:19	4.042
2024-03-26 15:25:15	223.963		2024-03-26 15:10:49	141.706		2024-05-21	13:24:26	2024-05-21 13:24:26	252.23		2024-05-21	12:32:49	2024-05-21 12:32:49	3.946
2024-03-26 15:25:45	223.866		2024-03-26 15:11:19	141.915		2024-05-21	13:24:56	2024-05-21 13:24:56	253.022		2024-05-21	12:33:19	2024-05-21 12:33:19	3.9
2024-03-26 15:26:15	226.271		2024-03-26 15:11:49	139.702		2024-05-21	13:25:26	2024-05-21 13:25:26	253.481		2024-05-21	12:33:49	2024-05-21 12:33:49	3.912
2024-03-26 15:26:45	225.844		2024-03-26 15:12:19	136.812		2024-05-21	13:25:56	2024-05-21 13:25:56	250.499		2024-05-21	12:34:19	2024-05-21 12:34:19	3.983
2024-03-26 15:27:15	226.052		2024-03-26 15:12:49	133.946		2024-05-21	13:26:26	2024-05-21 13:26:26	252.467		2024-05-21	12:34:49	2024-05-21 12:34:49	4.2
2024-03-26 15:27:45	225.945		2024-03-26 15:13:19	133.327		2024-05-21	13:26:56	2024-05-21 13:26:56	250.4		2024-05-21	12:35:19	2024-05-21 12:35:19	4.998
2024-03-26 15:28:15	225.497		2024-03-26 15:13:49	133.827		2024-05-21	13:27:26	2024-05-21 13:27:26	248.498		2024-05-21	12:35:49	2024-05-21 12:35:49	6.134
2024-03-26 15:28:45	224.289		2024-03-26 15:14:19	138.805		2024-05-21	13:27:56	2024-05-21 13:27:56	247.019		2024-05-21	12:36:19	2024-05-21 12:36:19	7.029
2024-03-26 15:29:15	232.676		2024-03-26 15:14:49	139.605		2024-05-21	13:28:26	2024-05-21 13:28:26	248.234		2024-05-21	12:36:49	2024-05-21 12:36:49	8.27
2024-03-26 15:29:45	229.347		2024-03-26 15:15:19	132.709		2024-05-21	13:28:56	2024-05-21 13:28:56	246.713		2024-05-21	12:37:19	2024-05-21 12:37:19	10.372
2024-03-26 15:30:15	223.127		2024-03-26 15:15:49	128.831		2024-05-21	13:29:26	2024-05-21 13:29:26	251.36		2024-05-21	12:37:49	2024-05-21 12:37:49	11.181
2024-03-26 15:30:45	219.001		2024-03-26 15:16:19	124.557		2024-05-21	13:29:56	2024-05-21 13:29:56	250.651		2024-05-21	12:38:19	2024-05-21 12:38:19	11.215
2024-03-26 15:31:15	219.729		2024-03-26 15:16:49	127.872		2024-05-21	13:30:26	2024-05-21 13:30:26	249.147		2024-05-21	12:38:49	2024-05-21 12:38:49	10.87
2024-03-26 15:31:45	218.053		2024-03-26 15:17:19	126.736		2024-05-21	13:30:56	2024-05-21 13:30:56	248.778		2024-05-21	12:39:19	2024-05-21 12:39:19	10.583
2024-03-26 15:32:15	223.683		2024-03-26 15:17:49	122.45		2024-05-21	13:31:26	2024-05-21 13:31:26	243.582		2024-05-21	12:39:49	2024-05-21 12:39:49	10.096
2024-03-26 15:32:45	229.351		2024-03-26 15:18:19	120.909		2024-05-21	13:31:56	2024-05-21 13:31:56	251.673		2024-05-21	12:40:19	2024-05-21 12:40:19	10.378
2024-03-26 15:33:15	232.532		2024-03-26 15:18:49	124.95		2024-05-21	13:32:26	2024-05-21 13:32:26	250.095		2024-05-21	12:40:49	2024-05-21 12:40:49	10.384
2024-03-26 15:33:45	225.556		2024-03-26 15:19:19	124.008		2024-05-21	13:32:56	2024-05-21 13:32:56	251.762		2024-05-21	12:41:19	2024-05-21 12:41:19	9.682
2024-03-26 15:34:15	228.381		2024-03-26 15:19:49	119.635		2024-05-21	13:33:26	2024-05-21 13:33:26	253.599		2024-05-21	12:41:49	2024-05-21 12:41:49	8.978
2024-03-26 15:34:45	229.794		2024-03-26 15:20:19	117.135		2024-05-21	13:33:56	2024-05-21 13:33:56	254.752		2024-05-21	12:42:19	2024-05-21 12:42:19	8.681
2024-03-26 15:35:15	224.321		2024-03-26 15:20:49	123.642		2024-05-21	13:34:26	2024-05-21 13:34:26	252.362		2024-05-21	12:42:49	2024-05-21 12:42:49	8.569
2024-03-26 15:35:45	223.985		2024-03-26 15:21:19	130.333		2024-05-21	13:34:56	2024-05-21 13:34:56	254.158		2024-05-21	12:43:19	2024-05-21 12:43:19	8.487
2024-03-26 15:36:15	226.842		2024-03-26 15:21:49	131.753		2024-05-21	13:35:26	2024-05-21 13:35:26	253.088		2024-05-21	12:43:49	2024-05-21 12:43:49	8.437
2024-03-26 15:36:45	224.2		2024-03-26 15:22:19	148.069		2024-05-21	13:35:56	2024-05-21 13:35:56	256.128		2024-05-21	12:44:19	2024-05-21 12:44:19	8.968
2024-03-26 15:37:15	225.782		2024-03-26 15:22:49	159.174		2024-05-21	13:36:26	2024-05-21 13:36:26	257.718		2024-05-21	12:44:49	2024-05-21 12:44:49	9.938
2024-03-26 15:37:45	227.794		2024-03-26 15:23:19	156.743		2024-05-21	13:36:56	2024-05-21 13:36:56	258.557		2024-05-21	12:45:19	2024-05-21 12:45:19	10.422
2024-03-26 15:38:15	226.094		2024-03-26 15:23:49	156.007		2024-05-21	13:37:26	2024-05-21 13:37:26	259.518		2024-05-21	12:45:49	2024-05-21 12:45:49	10.404
2024-03-26 15:38:45	225.054		2024-03-26 15:24:19	153.718		2024-05-21	13:37:56	2024-05-21 13:37:56	260.851		2024-05-21	12:46:19	2024-05-21 12:46:19	10.536
2024-03-26 15:39:15	219.216		2024-03-26 15:24:49	143.174		2024-05-21	13:38:26	2024-05-21 13:38:26	260.334		2024-05-21	12:46:49	2024-05-21 12:46:49	10.546
2024-03-26 15:39:45	220.588		2024-03-26 15:25:19	145.502		2024-05-21	13:38:56	2024-05-21 13:38:56	256.534		2024-05-21	12:47:19	2024-05-21 12:47:19	10.319
2024-03-26 15:40:15	222.941		2024-03-26 15:25:49	146.246		2024-05-21	13:39:26	2024-05-21 13:39:26	258.133		2024-05-21	12:47:49	2024-05-21 12:47:49	9.907
2024-03-26 15:40:45	226.6		2024-03-26 15:26:19	149.67		2024-05-21	13:39:56	2024-05-21 13:39:56	260.79		2024-05-21	12:48:19	2024-05-21 12:48:19	9.394
2024-03-26 15:41:15	226.905		2024-03-26 15:26:49	164.97		2024-05-21	13:40:26	2024-05-21 13:40:26	258.12		2024-05-21	12:48:49	2024-05-21 12:48:49	8.845
2024-03-26 15:41:45	226.7		2024-03-26 15:27:19	186.527		2024-05-21	13:40:56	2024-05-21 13:40:56	259.262		2024-05-21	12:49:19	2024-05-21 12:49:19	8.198
2024-03-26 15:42:15	227.582		2024-03-26 15:27:49	194.402		2024-05-21	13:41:26	2024-05-21 13:41:26	250.329		2024-05-21	12:49:49	2024-05-21 12:49:49	7.738
2024-03-26 15:42:45	227.323		2024-03-26 15:28:19	186.415		2024-05-21	13:41:56	2024-05-21 13:41:56	251.022		2024-05-21	12:50:19	2024-05-21 12:50:19	7.453
2024-03-26 15:43:15	227.262		2024-03-26 15:28:49	183.084		2024-05-21	13:42:26	2024-05-21 13:42:26	254.208		2024-05-21	12:50:49	2024-05-21 12:50:49	7.669
2024-03-26 15:43:45	226.192		2024-03-26 15:29:19	181.065		2024-05-21	13:42:56	2024-05-21 13:42:56	253.47		2024-05-21	12:51:19	2024-05-21 12:51:19	8.181
2024-03-26 15:44:15	224.658		2024-03-26 15:29:49	161.437		2024-05-21	13:43:26	2024-05-21 13:43:26	252.363		2024-05-21	12:51:49	2024-05-21 12:51:49	8.369
2024-03-26 15:44:45	224.145		2024-03-26 15:30:19	144.642		2024-05-21	13:43:56	2024-05-21 13:43:56	257.034		2024-05-21	12:52:19	2024-05-21 12:52:19	8.25
2024-03-26 15:45:15	228.168		2024-03-26 15:30:49	130.285		2024-05-21	13:44:26	2024-05-21 13:44:26	251.854		2024-05-21	12:52:49	2024-05-21 12:52:49	8.114
2024-03-26 15:45:45	226.686		2024-03-26 15:31:19	140.888		2024-05-21	13:44:56	2024-05-21 13:44:56	254.936		2024-05-21	12:53:19	2024-05-21 12:53:19	7.859
2024-03-26 15:46:15	228.773		2024-03-26 15:31:49	138.972		2024-05-21	13:45:26	2024-05-21 13:45:26	257.135		2024-05-21	12:53:49	2024-05-21 12:53:49	7.763
2024-03-26 15:46:45	228.722		2024-03-26 15:32:19	140.876		2024-05-21	13:45:56	2024-05-21 13:45:56	257.596		2024-05-21	12:54:19	2024-05-21 12:54:19	7.977
2024-03-26 15:47:15	229.903		2024-03-26 15:32:49	143.656		2024-05-21	13:46:26	2024-05-21 13:46:26	256.824		2024-05-21	12:54:49	2024-05-21 12:54:49	8.158
2024-03-26 15:47:45	229.003		2024-03-26 15:33:19	163.811		2024-05-21	13:46:56	2024-05-21 13:46:56	256.871		2024-05-21	12:55:19	2024-05-21 12:55:19	8.602
2024-03-26 15:48:15	227.444		2024-03-26 15:33:49	128.005		2024-05-21	13:47:26	2024-05-21 13:47:26	254.02		2024-05-21	12:55:49	2024-05-21 12:55:49	8.932
2024-03-26 15:48:45	229.599		2024-03-26 15:34:19	124.431		2024-05-21	13:47:56	2024-05-21 13:47:56	254.55		2024-05-21	12:56:19	2024-05-21 12:56:19	9.018
2024-03-26 15:49:15	228.29		2024-03-26 15:34:49	132.85		2024-05-21	13:48:26	2024-05-21 13:48:26	255.184		2024-05-21	12:56:49	2024-05-21 12:56:49	9.036
2024-03-26 15:49:45	231.39		2024-03-26 15:35:19	135.702		2024-05-21	13:48:56	2024-05-21 13:48:56	257.359		2024-05-21	12:57:19	2024-05-21 12:57:19	8.742
2024-03-26 15:50:15	229.023		2024-03-26 15:35:49	149.381		2024-05-21	13:49:26	2024-05-21 13:49:26	258.102		2024-05-21	12:57:49	2024-05-21 12:57:49	8.437
2024-03-26 15:50:45	222.673		2024-03-26 15:36:19	151.373		2024-05-21	13:49:56	2024-05-21 13:49:56	256.931		2024-05-21	12:58:19	2024-05-21 12:58:19	8.145
2024-03-26 15:51:15	230.141		2024-03-26 15:36:49	154.701		2024-05-21	13:50:26	2024-05-21 13:50:26	256.954		2024-05-21	12:58:49	2024-05-21 12:58:49	7.98
2024-03-26 15:51:45	227.895		2024-03-26 15:37:19	147.996		2024-05-21	13:50:56	2024-05-21 13:50:56	255.62		2024-05-21	12:59:19	2024-05-21 12:59:19	8.055
2024-03-26 15:52:15	224.832		2024-03-26 15:37:49	152.495		2024-05-21	13:51:26	2024-05-21 13:51:26	255.196		2024-05-21	12:59:49	2024-05-21 12:59:49	8.072
2024-03-26 15:52:45	218.176		2024-03-26 15:38:19	155.966		2024-05-21	13:51:56	2024-05-21 13:51:56	255.157		2024-05-21	13:00:19	2024-05-21 13:00:19	8.033
2024-03-26 15:53:15	224.245		2024-03-26 15:38:49	162.136		2024-05-21	13:52:26	2024-05-21 13:52:26	253.762		2024-05-21	13:00:49	2024-05-21 13:00:49	8.13
2024-03-26 15:53:45	225.91		2024-03-26 15:39:19	168.536		2024-05-21	13:52:56	2024-05-21 13:52:56	251.267		2024-05-21	13:01:19	2024-05-21 13:01:19	8.675
2024-03-26 15:54:15	227.395		2024-03-26 15:39:49	184.05		2024-05-21	13:53:26	2024-05-21 13:53:26	251.237		2024-05-21	13:01:49	2024-05-21 13:01:49	10.405
2024-03-26 15:54:45	228.311		2024-03-26 15:40:19	187.053		2024-05-21	13:53:56	2024-05-21 13:53:56	249.82		2024-05-21	13:02:19	2024-05-21 13:02:19	11.231
2024-03-26 15:55:15	223.114		2024-03-26 15:40:49	185.585		2024-05-21	13:54:26	2024-05-21 13:54:26	251.889		2024-05-21	13:02:49	2024-05-21 13:02:49	11.013
2024-03-26 15:55:45	228.915		2024-03-26 15:41:19	187.561		2024-05-21	13:54:56	2024-05-21 13:54:56	252.302		2024-05-21	13:03:19	2024-05-21 13:03:19	10.458
2024-03-26 15:56:15	230.693		2024-03-26 15:41:49	185.088		2024-05-21	13:55:26	2024-05-21 13:55:26	252.364		2024-05-21	13:03:49	2024-05-21 13:03:49	9.959
2024-03-26 15:56:45	227.857		2024-03-26 15:42:19	183.08		2024-05-21	13:55:56	2024-05-21 13:55:56	253.451		2024-05-21	13:04:19	2024-05-21 13:04:19	9.51
2024-03-26 15:57:15	227.739		2024-03-26 15:42:49	190.162		2024-05-21	13:56:26	2024-05-21 13:56:26	254.295		2024-05-21	13:04:49	2024-05-21 13:04:49	9.501
2024-03-26 15:57:45	227.273		2024-03-26 15:43:19	181.235		2024-05-21	13:56:56	2024-05-21 13:56:56	253.946		2024-05-21	13:05:19	2024-05-21 13:05:19	9.206
2024-03-26 15:58:15	227.096		2024-03-26 15:43:49	180.185		2024-05-21	13:57:26	2024-05-21 13:57:26	253.117		2024-05-21	13:05:49	2024-05-21 13:05:49	8.585
2024-03-26 15:58:45	228.25		2024-03-26 15:44:19	176.709		2024-05-21	13:57:56	2024-05-21 13:57:56	253.94		2024-05-21	13:06:19	2024-05-21 13:06:19	7.969
2024-03-26 15:59:15	229.767		2024-03-26 15:44:49	163.245		2024-05-21	13:58:26	2024-05-21 13:58:26	253.596		2024-05-21	13:06:49	2024-05-21 13:06:49	7.441
2024-03-26 15:59:45	228.696		2024-03-26 15:45:19	165.195		2024-05-21	13:58:56	2024-05-21 13:58:56	253.459		2024-05-21	13:07:19	2024-05-21 13:07:19	7.131
2024-03-26 16:00:15	227.777		2024-03-26 15:45:49	170.808		2024-05-21	13:59:26	2024-05-21 13:59:26	254.532		2024-05-21	13:07:49	2024-05-21 13:07:49	6.84
2024-03-26 16:00:45	230.489		2024-03-26 15:46:19	154.932		2024-05-21	13:59:56	2024-05-21 13:59:56	254.191		2024-05-21	13:08:19	2024-05-21 13:08:19	6.596
2024-03-26 16:01:15	231.433		2024-03-26 15:46:49	167.413		2024-05-21	14:00:26	2024-05-21 14:00:26	252.519		2024-05-21	13:08:49	2024-05-21 13:08:49	6.374
2024-03-26 16:01:45	228.925		2024-03-26 15:47:19	166.882		2024-05-21	14:00:56	2024-05-21 14:00:56	250.426		2024-05-21	13:09:19	2024-05-21 13:09:19	6.13
2024-03-26 16:02:15	230.498		2024-03-26 15:47:49	172.451		2024-05-21	14:01:26	2024-05-21 14:01:26	249.098		2024-05-21	13:09:49	2024-05-21 13:09:49	5.8
2024-03-26 16:02:45	232.618		2024-03-26 15:48:19	171.544		2024-05-21	14:01:56	2024-05-21 14:01:56	250.701		2024-05-21	13:10:19	2024-05-21 13:10:19	5.828
2024-03-26 16:03:15	230.239		2024-03-26 15:48:49	166.474		2024-05-21	14:02:26	2024-05-21 14:02:26	252.08		2024-05-21	13:10:49	2024-05-21 13:10:49	5.854
2024-03-26 16:03:45	228.577		2024-03-26 15:49:19	168.305		2024-05-21	14:02:56	2024-05-21 14:02:56	251.287		2024-05-21	13:11:19	2024-05-21 13:11:19	5.828
2024-03-26 16:04:15	230.955		2024-03-26 15:49:49	177.09		2024-05-21	14:03:26	2024-05-21 14:03:26	251.011		2024-05-21	13:11:49	2024-05-21 13:11:49	6.065
2024-03-26 16:04:45	228.849		2024-03-26 15:50:19	178.64		2024-05-21	14:03:56	2024-05-21 14:03:56	250.785		2024-05-21	13:12:19	2024-05-21 13:12:19	6.831
2024-03-26 16:05:15	232.057		2024-03-26 15:50:49	177.081		2024-05-21	14:04:26	2024-05-21 14:04:26	251.441		2024-05-21	13:12:49	2024-05-21 13:12:49	7.635
2024-03-26 16:05:45	231.337		2024-03-26 15:51:19	169.096		2024-05-21	14:04:56	2024-05-21 14:04:56	251.976		2024-05-21	13:13:19	2024-05-21 13:13:19	8.017
2024-03-26 16:06:15	230.685		2024-03-26 15:51:49	171.373		2024-05-21	14:05:26	2024-05-21 14:05:26	251.196		2024-05-21	13:13:49	2024-05-21 13:13:49	8.066
2024-03-26 16:06:45	230.702		2024-03-26 15:52:19	170.778		2024-05-21	14:05:56	2024-05-21 14:05:56	252.503		2024-05-21	13:14:19	2024-05-21 13:14:19	8.147
2024-03-26 16:07:15	231.7		2024-03-26 15:52:49	171.15		2024-05-21	14:06:26	2024-05-21 14:06:26	252.103		2024-05-21	13:14:49	2024-05-21 13:14:49	8.067
2024-03-26 16:07:45	232.111		2024-03-26 15:53:19	165.838		2024-05-21	14:06:56	2024-05-21 14:06:56	251.974		2024-05-21	13:15:19	2024-05-21 13:15:19	7.696
2024-03-26 16:08:15	227.383		2024-03-26 15:53:49	165.051		2024-05-21	14:07:26	2024-05-21 14:07:26	252.092		2024-05-21	13:15:49	2024-05-21 13:15:49	7.239
2024-03-26 16:08:45	242.519		2024-03-26 15:54:19	165.372		2024-05-21	14:07:56	2024-05-21 14:07:56	252.657		2024-05-21	13:16:19	2024-05-21 13:16:19	6.737
2024-03-26 16:09:15	235.865		2024-03-26 15:54:49	169.483		2024-05-21	14:08:26	2024-05-21 14:08:26	253.659		2024-05-21	13:16:49	2024-05-21 13:16:49	6.363
2024-03-26 16:09:45	231.565		2024-03-26 15:55:19	169.271		2024-05-21	14:08:56	2024-05-21 14:08:56	254.187		2024-05-21	13:17:19	2024-05-21 13:17:19	6.096
2024-03-26 16:10:15	229.874		2024-03-26 15:55:49	172.914		2024-05-21	14:09:26	2024-05-21 14:09:26	250.784		2024-05-21	13:17:49	2024-05-21 13:17:49	5.769
2024-03-26 16:10:45	227.406		2024-03-26 15:56:19	179.57		2024-05-21	14:09:56	2024-05-21 14:09:56	248.142		2024-05-21	13:18:19	2024-05-21 13:18:19	5.545
2024-03-26 16:11:15	230.033		2024-03-26 15:56:49	181.605		2024-05-21	14:10:26	2024-05-21 14:10:26	249.368		2024-05-21	13:18:49	2024-05-21 13:18:49	5.474
2024-03-26 16:11:45	231.206		2024-03-26 15:57:19	180.994		2024-05-21	14:10:56	2024-05-21 14:10:56	249.289		2024-05-21	13:19:19	2024-05-21 13:19:19	5.233
2024-03-26 16:12:15	230.596		2024-03-26 15:57:49	177.342		2024-05-21	14:11:26	2024-05-21 14:11:26	250.511		2024-05-21	13:19:49	2024-05-21 13:19:49	5.112
2024-03-26 16:12:45	231.946		2024-03-26 15:58:19	162.781		2024-05-21	14:11:56	2024-05-21 14:11:56	249.287		2024-05-21	13:20:19	2024-05-21 13:20:19	5.707
2024-03-26 16:13:15	230.808		2024-03-26 15:58:49	162.125		2024-05-21	14:12:26	2024-05-21 14:12:26	251.278		2024-05-21	13:20:49	2024-05-21 13:20:49	5.974
2024-03-26 16:13:45	229.005		2024-03-26 15:59:19	188.508		2024-05-21	14:12:56	2024-05-21 14:12:56	252.57		2024-05-21	13:21:19	2024-05-21 13:21:19	5.682
2024-03-26 16:14:15	227.999		2024-03-26 15:59:49	188.31		2024-05-21	14:13:26	2024-05-21 14:13:26	252.472		2024-05-21	13:21:49	2024-05-21 13:21:49	5.252
2024-03-26 16:14:45	228.078		2024-03-26 16:00:19	170.267		2024-05-21	14:13:56	2024-05-21 14:13:56	251.413		2024-05-21	13:22:19	2024-05-21 13:22:19	5.108
2024-03-26 16:15:15	228.569		2024-03-26 16:00:49	162.9		2024-05-21	14:14:26	2024-05-21 14:14:26	252.074		2024-05-21	13:22:49	2024-05-21 13:22:49	5.061
2024-03-26 16:15:45	227.969		2024-03-26 16:01:19	186.566		2024-05-21	14:14:56	2024-05-21 14:14:56	252.71		2024-05-21	13:23:19	2024-05-21 13:23:19	4.797
2024-03-26 16:16:15	228.778		2024-03-26 16:01:49	206.172		2024-05-21	14:15:26	2024-05-21 14:15:26	251.918		2024-05-21	13:23:49	2024-05-21 13:23:49	4.447
2024-03-26 16:16:45	227.926		2024-03-26 16:02:19	207.639		2024-05-21	14:15:56	2024-05-21 14:15:56	252.542		2024-05-21	13:24:19	2024-05-21 13:24:19	4.078
2024-03-26 16:17:15	229.053		2024-03-26 16:02:49	204.853		2024-05-21	14:16:26	2024-05-21 14:16:26	251.719		2024-05-21	13:24:49	2024-05-21 13:24:49	3.889
2024-03-26 16:17:45	232.049		2024-03-26 16:03:19	192.616		2024-05-21	14:16:56	2024-05-21 14:16:56	252.621		2024-05-21	13:25:19	2024-05-21 13:25:19	3.934
2024-03-26 16:18:15	229.767		2024-03-26 16:03:49	186.603		2024-05-21	14:17:26	2024-05-21 14:17:26	252.525		2024-05-21	13:25:49	2024-05-21 13:25:49	4.138
2024-03-26 16:18:45	228.422		2024-03-26 16:04:19	185.618		2024-05-21	14:17:56	2024-05-21 14:17:56	253.005		2024-05-21	13:26:19	2024-05-21 13:26:19	4.362
2024-03-26 16:19:15	231.775		2024-03-26 16:04:49	176.396		2024-05-21	14:18:26	2024-05-21 14:18:26	249.634		2024-05-21	13:26:49	2024-05-21 13:26:49	4.34
2024-03-26 16:19:45	232.797		2024-03-26 16:05:19	179.603		2024-05-21	14:18:56	2024-05-21 14:18:56	252.006		2024-05-21	13:27:19	2024-05-21 13:27:19	4.311
2024-03-26 16:20:15	228.171		2024-03-26 16:05:49	190.943		2024-05-21	14:19:26	2024-05-21 14:19:26	252.933		2024-05-21	13:27:49	2024-05-21 13:27:49	4.135
2024-03-26 16:20:45	230.046		2024-03-26 16:06:19	201.27		2024-05-21	14:19:56	2024-05-21 14:19:56	248.183		2024-05-21	13:28:19	2024-05-21 13:28:19	3.947
2024-03-26 16:21:15	231.499		2024-03-26 16:06:49	209.946		2024-05-21	14:20:26	2024-05-21 14:20:26	249.606		2024-05-21	13:28:49	2024-05-21 13:28:49	3.722
2024-03-26 16:21:45	230.299		2024-03-26 16:07:19	211.905		2024-05-21	14:20:56	2024-05-21 14:20:56	250.465		2024-05-21	13:29:19	2024-05-21 13:29:19	3.732
2024-03-26 16:22:15	233.409		2024-03-26 16:07:49	212.099		2024-05-21	14:21:26	2024-05-21 14:21:26	249.435		2024-05-21	13:29:49	2024-05-21 13:29:49	3.914
2024-03-26 16:22:45	230.046		2024-03-26 16:08:19	209.634		2024-05-21	14:21:56	2024-05-21 14:21:56	250.295		2024-05-21	13:30:19	2024-05-21 13:30:19	3.982
2024-03-26 16:23:15	229.528		2024-03-26 16:08:49	200.919		2024-05-21	14:22:26	2024-05-21 14:22:26	251.381		2024-05-21	13:30:49	2024-05-21 13:30:49	3.86
2024-03-26 16:23:45	231.939		2024-03-26 16:09:19	178.908		2024-05-21	14:22:56	2024-05-21 14:22:56	250.899		2024-05-21	13:31:19	2024-05-21 13:31:19	3.649
2024-03-26 16:24:15	230.866		2024-03-26 16:09:49	179.853		2024-05-21	14:23:26	2024-05-21 14:23:26	251.481		2024-05-21	13:31:49	2024-05-21 13:31:49	3.517
2024-03-26 16:24:45	229.941		2024-03-26 16:10:19	180.303		2024-05-21	14:23:56	2024-05-21 14:23:56	254.401		2024-05-21	13:32:19	2024-05-21 13:32:19	3.572
2024-03-26 16:25:15	230.691		2024-03-26 16:10:49	190.164		2024-05-21	14:24:26	2024-05-21 14:24:26	252.054		2024-05-21	13:32:49	2024-05-21 13:32:49	3.742
2024-03-26 16:25:45	229.361		2024-03-26 16:11:19	197.432		2024-05-21	14:24:56	2024-05-21 14:24:56	250.245		2024-05-21	13:33:19	2024-05-21 13:33:19	3.873
2024-03-26 16:26:15	230.709		2024-03-26 16:11:49	198.776		2024-05-21	14:25:26	2024-05-21 14:25:26	247.998		2024-05-21	13:33:49	2024-05-21 13:33:49	3.742
2024-03-26 16:26:45	230.148		2024-03-26 16:12:19	199.086		2024-05-21	14:25:56	2024-05-21 14:25:56	247.932		2024-05-21	13:34:19	2024-05-21 13:34:19	3.564
2024-03-26 16:27:15	230.349		2024-03-26 16:12:49	200.29		2024-05-21	14:26:26	2024-05-21 14:26:26	246.904		2024-05-21	13:34:49	2024-05-21 13:34:49	3.367
2024-03-26 16:27:45	230.01		2024-03-26 16:13:19	202.312		2024-05-21	14:26:56	2024-05-21 14:26:56	247.27		2024-05-21	13:35:19	2024-05-21 13:35:19	3.233
2024-03-26 16:28:15	230.013		2024-03-26 16:13:49	202.5		2024-05-21	14:27:26	2024-05-21 14:27:26	246.656		2024-05-21	13:35:49	2024-05-21 13:35:49	3.013
2024-03-26 16:28:45	228.173		2024-03-26 16:14:19	200.142		2024-05-21	14:27:56	2024-05-21 14:27:56	246.625		2024-05-21	13:36:19	2024-05-21 13:36:19	3.021
2024-03-26 16:29:15	228.129		2024-03-26 16:14:49	199.514		2024-05-21	14:28:26	2024-05-21 14:28:26	248.063		2024-05-21	13:36:49	2024-05-21 13:36:49	3.077
2024-03-26 16:29:45	230.816		2024-03-26 16:15:19	196.547		2024-05-21	14:28:56	2024-05-21 14:28:56	248.222		2024-05-21	13:37:19	2024-05-21 13:37:19	3.094
2024-03-26 16:30:15	233.02		2024-03-26 16:15:49	181.713		2024-05-21	14:29:26	2024-05-21 14:29:26	247.948		2024-05-21	13:37:49	2024-05-21 13:37:49	3.049
2024-03-26 16:30:45	232.579		2024-03-26 16:16:19	174.294		2024-05-21	14:29:56	2024-05-21 14:29:56	248.019		2024-05-21	13:38:19	2024-05-21 13:38:19	2.997
2024-03-26 16:31:15	228.605		2024-03-26 16:16:49	167.767		2024-05-21	14:30:26	2024-05-21 14:30:26	249.348		2024-05-21	13:38:49	2024-05-21 13:38:49	2.907
2024-03-26 16:31:45	228.029		2024-03-26 16:17:19	174.322		2024-05-21	14:30:56	2024-05-21 14:30:56	249.615		2024-05-21	13:39:19	2024-05-21 13:39:19	3.089
2024-03-26 16:32:15	227.703		2024-03-26 16:17:49	157.867		2024-05-21	14:31:26	2024-05-21 14:31:26	250.289		2024-05-21	13:39:49	2024-05-21 13:39:49	2.821
2024-03-26 16:32:45	231.533		2024-03-26 16:18:19	189.492		2024-05-21	14:31:56	2024-05-21 14:31:56	248.506		2024-05-21	13:40:19	2024-05-21 13:40:19	2.803
2024-03-26 16:33:15	229.961		2024-03-26 16:18:49	193.138		2024-05-21	14:32:26	2024-05-21 14:32:26	251.389		2024-05-21	13:40:49	2024-05-21 13:40:49	2.93
2024-03-26 16:33:45	228.2		2024-03-26 16:19:19	195.472		2024-05-21	14:32:56	2024-05-21 14:32:56	251.073		2024-05-21	13:41:19	2024-05-21 13:41:19	2.959
2024-03-26 16:34:15	229.862		2024-03-26 16:19:49	196.228		2024-05-21	14:33:26	2024-05-21 14:33:26	250.98		2024-05-21	13:41:49	2024-05-21 13:41:49	2.94
2024-03-26 16:34:45	230.391		2024-03-26 16:20:19	182.965		2024-05-21	14:33:56	2024-05-21 14:33:56	250.325		2024-05-21	13:42:19	2024-05-21 13:42:19	2.661
2024-03-26 16:35:15	230.499		2024-03-26 16:20:49	190.419		2024-05-21	14:34:26	2024-05-21 14:34:26	251.062		2024-05-21	13:42:49	2024-05-21 13:42:49	2.42
2024-03-26 16:35:45	230.011		2024-03-26 16:21:19	194.386		2024-05-21	14:34:56	2024-05-21 14:34:56	249.545		2024-05-21	13:43:19	2024-05-21 13:43:19	2.484
2024-03-26 16:36:15	230.336		2024-03-26 16:21:49	200.053		2024-05-21	14:35:26	2024-05-21 14:35:26	249.596		2024-05-21	13:43:49	2024-05-21 13:43:49	2.569
2024-03-26 16:36:45	232.969		2024-03-26 16:22:19	200.574		2024-05-21	14:35:56	2024-05-21 14:35:56	250.488		2024-05-21	13:44:19	2024-05-21 13:44:19	2.522
2024-03-26 16:37:15	233.974		2024-03-26 16:22:49	200.509		2024-05-21	14:36:26	2024-05-21 14:36:26	250.763		2024-05-21	13:44:49	2024-05-21 13:44:49	2.63
2024-03-26 16:37:45	233.025		2024-03-26 16:23:19	199.791		2024-05-21	14:36:56	2024-05-21 14:36:56	249.494		2024-05-21	13:45:19	2024-05-21 13:45:19	2.667
2024-03-26 16:38:15	232.95		2024-03-26 16:23:49	202.801		2024-05-21	14:37:26	2024-05-21 14:37:26	251.07		2024-05-21	13:45:49	2024-05-21 13:45:49	2.402
2024-03-26 16:38:45	232.355		2024-03-26 16:24:19	206.005		2024-05-21	14:37:56	2024-05-21 14:37:56	251.639		2024-05-21	13:46:19	2024-05-21 13:46:19	2.206
2024-03-26 16:39:15	232.161		2024-03-26 16:24:49	202.783		2024-05-21	14:38:26	2024-05-21 14:38:26	253.17		2024-05-21	13:46:49	2024-05-21 13:46:49	2.021
2024-03-26 16:39:45	231.564		2024-03-26 16:25:19	205.531		2024-05-21	14:38:56	2024-05-21 14:38:56	252.754		2024-05-21	13:47:19	2024-05-21 13:47:19	2.026
2024-03-26 16:40:15	233.433		2024-03-26 16:25:49	209.606		2024-05-21	14:39:26	2024-05-21 14:39:26	253.929		2024-05-21	13:47:49	2024-05-21 13:47:49	2.027
2024-03-26 16:40:45	234.095		2024-03-26 16:26:19	204.71		2024-05-21	14:39:56	2024-05-21 14:39:56	254.378		2024-05-21	13:48:19	2024-05-21 13:48:19	1.774
2024-03-26 16:41:15	233.891		2024-03-26 16:26:49	205.45		2024-05-21	14:40:26	2024-05-21 14:40:26	253.871		2024-05-21	13:48:49	2024-05-21 13:48:49	1.614
2024-03-26 16:41:45	233.668		2024-03-26 16:27:19	201.923		2024-05-21	14:40:56	2024-05-21 14:40:56	252.665		2024-05-21	13:49:19	2024-05-21 13:49:19	1.529
2024-03-26 16:42:15	233.59		2024-03-26 16:27:49	203.407		2024-05-21	14:41:26	2024-05-21 14:41:26	251.977		2024-05-21	13:49:49	2024-05-21 13:49:49	1.785
2024-03-26 16:42:45	233.304		2024-03-26 16:28:19	202.715		2024-05-21	14:41:56	2024-05-21 14:41:56	252.037		2024-05-21	13:50:19	2024-05-21 13:50:19	2.133
2024-03-26 16:43:15	232.119		2024-03-26 16:28:49	200.773		2024-05-21	14:42:26	2024-05-21 14:42:26	252.243		2024-05-21	13:50:49	2024-05-21 13:50:49	2.639
2024-03-26 16:43:45	232.42		2024-03-26 16:29:19	201.631		2024-05-21	14:42:56	2024-05-21 14:42:56	252.195		2024-05-21	13:51:19	2024-05-21 13:51:19	3.007
2024-03-26 16:44:15	231.437		2024-03-26 16:29:49	198.748		2024-05-21	14:43:26	2024-05-21 14:43:26	252.036		2024-05-21	13:51:49	2024-05-21 13:51:49	2.904
2024-03-26 16:44:45	232.208		2024-03-26 16:30:19	207.146		2024-05-21	14:43:56	2024-05-21 14:43:56	252.79		2024-05-21	13:52:19	2024-05-21 13:52:19	2.59
2024-03-26 16:45:15	231.142		2024-03-26 16:30:49	206.834		2024-05-21	14:44:26	2024-05-21 14:44:26	252.109		2024-05-21	13:52:49	2024-05-21 13:52:49	2.134
2024-03-26 16:45:45	231.248		2024-03-26 16:31:19	207.322		2024-05-21	14:44:56	2024-05-21 14:44:56	253.788		2024-05-21	13:53:19	2024-05-21 13:53:19	1.686
2024-03-26 16:46:15	230.519		2024-03-26 16:31:49	207.702		2024-05-21	14:45:26	2024-05-21 14:45:26	254.678		2024-05-21	13:53:49	2024-05-21 13:53:49	1.409
2024-03-26 16:46:45	230.146		2024-03-26 16:32:19	206.077		2024-05-21	14:45:56	2024-05-21 14:45:56	253.972		2024-05-21	13:54:19	2024-05-21 13:54:19	1.211
2024-03-26 16:47:15	230.204		2024-03-26 16:32:49	205.278		2024-05-21	14:46:26	2024-05-21 14:46:26	252.945		2024-05-21	13:54:49	2024-05-21 13:54:49	1.061
2024-03-26 16:47:45	230.331		2024-03-26 16:33:19	201.437		2024-05-21	14:46:56	2024-05-21 14:46:56	250.807		2024-05-21	13:55:19	2024-05-21 13:55:19	1.065
2024-03-26 16:48:15	229.976		2024-03-26 16:33:49	198.181		2024-05-21	14:47:26	2024-05-21 14:47:26	250.919		2024-05-21	13:55:49	2024-05-21 13:55:49	1.19
2024-03-26 16:48:45	228.82		2024-03-26 16:34:19	200.109		2024-05-21	14:47:56	2024-05-21 14:47:56	250.526		2024-05-21	13:56:19	2024-05-21 13:56:19	1.477
2024-03-26 16:49:15	227.998		2024-03-26 16:34:49	203.91		2024-05-21	14:48:26	2024-05-21 14:48:26	251.006		2024-05-21	13:56:49	2024-05-21 13:56:49	1.822
2024-03-26 16:49:45	228.997		2024-03-26 16:35:19	200.836		2024-05-21	14:48:56	2024-05-21 14:48:56	247.978		2024-05-21	13:57:19	2024-05-21 13:57:19	2.089
2024-03-26 16:50:15	228.374		2024-03-26 16:35:49	198.26		2024-05-21	14:49:26	2024-05-21 14:49:26	249.348		2024-05-21	13:57:49	2024-05-21 13:57:49	2.242
2024-03-26 16:50:45	227.357		2024-03-26 16:36:19	204.842		2024-05-21	14:49:56	2024-05-21 14:49:56	249.392		2024-05-21	13:58:19	2024-05-21 13:58:19	2.336
2024-03-26 16:51:15	229.265		2024-03-26 16:36:49	201.879		2024-05-21	14:50:26	2024-05-21 14:50:26	249.681		2024-05-21	13:58:49	2024-05-21 13:58:49	2.38
2024-03-26 16:51:45	227.584		2024-03-26 16:37:19	209.001		2024-05-21	14:50:56	2024-05-21 14:50:56	250.507		2024-05-21	13:59:19	2024-05-21 13:59:19	2.473
2024-03-26 16:52:15	229.167		2024-03-26 16:37:49	209.973		2024-05-21	14:51:26	2024-05-21 14:51:26	249.345		2024-05-21	13:59:49	2024-05-21 13:59:49	2.527
2024-03-26 16:52:45	227.838		2024-03-26 16:38:19	205.157		2024-05-21	14:51:56	2024-05-21 14:51:56	249.308		2024-05-21	14:00:19	2024-05-21 14:00:19	2.433
2024-03-26 16:53:15	227.83		2024-03-26 16:38:49	206.373		2024-05-21	14:52:26	2024-05-21 14:52:26	251.581		2024-05-21	14:00:49	2024-05-21 14:00:49	2.499
2024-03-26 16:53:45	228.5		2024-03-26 16:39:19	202		2024-05-21	14:52:56	2024-05-21 14:52:56	248.438		2024-05-21	14:01:19	2024-05-21 14:01:19	2.566
2024-03-26 16:54:15	227.836		2024-03-26 16:39:49	197.225		2024-05-21	14:53:26	2024-05-21 14:53:26	249.278		2024-05-21	14:01:49	2024-05-21 14:01:49	2.567
2024-03-26 16:54:45	228.373		2024-03-26 16:40:19	201.745		2024-05-21	14:53:56	2024-05-21 14:53:56	247.219		2024-05-21	14:02:19	2024-05-21 14:02:19	2.65
2024-03-26 16:55:15	228.233		2024-03-26 16:40:49	207.638		2024-05-21	14:54:26	2024-05-21 14:54:26	250.458		2024-05-21	14:02:49	2024-05-21 14:02:49	2.599
2024-03-26 16:55:45	227.328		2024-03-26 16:41:19	202.534		2024-05-21	14:54:56	2024-05-21 14:54:56	252.252		2024-05-21	14:03:19	2024-05-21 14:03:19	2.777
2024-03-26 16:56:15	227.623		2024-03-26 16:41:49	196.989		2024-05-21	14:55:26	2024-05-21 14:55:26	250.919		2024-05-21	14:03:49	2024-05-21 14:03:49	2.911
2024-03-26 16:56:45	226.793		2024-03-26 16:42:19	193.833		2024-05-21	14:55:56	2024-05-21 14:55:56	249.285		2024-05-21	14:04:19	2024-05-21 14:04:19	3.004
2024-03-26 16:57:15	227.268		2024-03-26 16:42:49	191.04		2024-05-21	14:56:26	2024-05-21 14:56:26	250.519		2024-05-21	14:04:49	2024-05-21 14:04:49	3.234
2024-03-26 16:57:45	226.963		2024-03-26 16:43:19	190.222		2024-05-21	14:56:56	2024-05-21 14:56:56	253.166		2024-05-21	14:05:19	2024-05-21 14:05:19	3.383
2024-03-26 16:58:15	225.285		2024-03-26 16:43:49	183.527		2024-05-21	14:57:26	2024-05-21 14:57:26	251.147		2024-05-21	14:05:49	2024-05-21 14:05:49	3.275
2024-03-26 16:58:45	226.66		2024-03-26 16:44:19	192.121		2024-05-21	14:57:56	2024-05-21 14:57:56	250.046		2024-05-21	14:06:19	2024-05-21 14:06:19	3.122
2024-03-26 16:59:15	227.354		2024-03-26 16:44:49	191.816		2024-05-21	14:58:26	2024-05-21 14:58:26	251.665		2024-05-21	14:06:49	2024-05-21 14:06:49	2.896
2024-03-26 16:59:45	226.973		2024-03-26 16:45:19	188.071		2024-05-21	14:58:56	2024-05-21 14:58:56	252.078		2024-05-21	14:07:19	2024-05-21 14:07:19	2.769
2024-03-26 17:00:15	227.217		2024-03-26 16:45:49	182.57		2024-05-21	14:59:26	2024-05-21 14:59:26	250.468		2024-05-21	14:07:49	2024-05-21 14:07:49	2.761
2024-03-26 17:00:45	227.071		2024-03-26 16:46:19	180.883		2024-05-21	14:59:56	2024-05-21 14:59:56	251.294		2024-05-21	14:08:19	2024-05-21 14:08:19	2.842
2024-03-26 17:01:15	225.201		2024-03-26 16:46:49	178.669		2024-05-21	15:00:26	2024-05-21 15:00:26	252.432		2024-05-21	14:08:49	2024-05-21 14:08:49	3.673
2024-03-26 17:01:45	226.144		2024-03-26 16:47:19	197.377		2024-05-21	15:00:56	2024-05-21 15:00:56	252.973		2024-05-21	14:09:19	2024-05-21 14:09:19	4.09
2024-03-26 17:02:15	226.195		2024-03-26 16:47:49	202.865		2024-05-21	15:01:26	2024-05-21 15:01:26	251.638		2024-05-21	14:09:49	2024-05-21 14:09:49	4.254
2024-03-26 17:02:45	226.38		2024-03-26 16:48:19	203.008		2024-05-21	15:01:56	2024-05-21 15:01:56	252.176		2024-05-21	14:10:19	2024-05-21 14:10:19	4.603
2024-03-26 17:03:15	226.521		2024-03-26 16:48:49	197.952		2024-05-21	15:02:26	2024-05-21 15:02:26	253.445		2024-05-21	14:10:49	2024-05-21 14:10:49	4.886
2024-03-26 17:03:45	226.433		2024-03-26 16:49:19	199.082		2024-05-21	15:02:56	2024-05-21 15:02:56	253.292		2024-05-21	14:11:19	2024-05-21 14:11:19	4.938
2024-03-26 17:04:15	226.497		2024-03-26 16:49:49	197.183		2024-05-21	15:03:26	2024-05-21 15:03:26	253.665		2024-05-21	14:11:49	2024-05-21 14:11:49	4.616
2024-03-26 17:04:45	226.293		2024-03-26 16:50:19	195.982		2024-05-21	15:03:56	2024-05-21 15:03:56	251.099		2024-05-21	14:12:19	2024-05-21 14:12:19	4.444
2024-03-26 17:05:15	225.914		2024-03-26 16:50:49	194.383		2024-05-21	15:04:26	2024-05-21 15:04:26	253.387		2024-05-21	14:12:49	2024-05-21 14:12:49	4.483
2024-03-26 17:05:45	226.038		2024-03-26 16:51:19	198.486		2024-05-21	15:04:56	2024-05-21 15:04:56	253.458		2024-05-21	14:13:19	2024-05-21 14:13:19	4.667
2024-03-26 17:06:15	225.719		2024-03-26 16:51:49	198.441		2024-05-21	15:05:26	2024-05-21 15:05:26	253.989		2024-05-21	14:13:49	2024-05-21 14:13:49	4.717
2024-03-26 17:06:45	225.347		2024-03-26 16:52:19	198.213		2024-05-21	15:05:56	2024-05-21 15:05:56	253.981		2024-05-21	14:14:19	2024-05-21 14:14:19	4.517
2024-03-26 17:07:15	224.745		2024-03-26 16:52:49	197.847		2024-05-21	15:06:26	2024-05-21 15:06:26	253.452		2024-05-21	14:14:49	2024-05-21 14:14:49	4.765
2024-03-26 17:07:45	224.903		2024-03-26 16:53:19	188.954		2024-05-21	15:06:56	2024-05-21 15:06:56	252.864		2024-05-21	14:15:19	2024-05-21 14:15:19	4.836
2024-03-26 17:08:15	225.303		2024-03-26 16:53:49	192.087		2024-05-21	15:07:26	2024-05-21 15:07:26	253.082		2024-05-21	14:15:49	2024-05-21 14:15:49	4.986
2024-03-26 17:08:45	225.259		2024-03-26 16:54:19	198.546		2024-05-21	15:07:56	2024-05-21 15:07:56	253.385		2024-05-21	14:16:19	2024-05-21 14:16:19	5.118
2024-03-26 17:09:15	225.144		2024-03-26 16:54:49	190.395		2024-05-21	15:08:26	2024-05-21 15:08:26	252.513		2024-05-21	14:16:49	2024-05-21 14:16:49	5.074
2024-03-26 17:09:45	224.597		2024-03-26 16:55:19	183.077		2024-05-21	15:08:56	2024-05-21 15:08:56	253.597		2024-05-21	14:17:19	2024-05-21 14:17:19	4.927
2024-03-26 17:10:15	224.923		2024-03-26 16:55:49	187.607		2024-05-21	15:09:26	2024-05-21 15:09:26	253.062		2024-05-21	14:17:49	2024-05-21 14:17:49	4.76
2024-03-26 17:10:45	224.682		2024-03-26 16:56:19	187.98		2024-05-21	15:09:56	2024-05-21 15:09:56	253.059		2024-05-21	14:18:19	2024-05-21 14:18:19	4.374
2024-03-26 17:11:15	224.416		2024-03-26 16:56:49	189.058		2024-05-21	15:10:26	2024-05-21 15:10:26	244.545		2024-05-21	14:18:49	2024-05-21 14:18:49	4.353
2024-03-26 17:11:45	224.201		2024-03-26 16:57:19	187.91		2024-05-21	15:10:56	2024-05-21 15:10:56	250.43		2024-05-21	14:19:19	2024-05-21 14:19:19	4.407
2024-03-26 17:12:15	223.648		2024-03-26 16:57:49	186.545		2024-05-21	15:11:26	2024-05-21 15:11:26	251.549		2024-05-21	14:19:49	2024-05-21 14:19:49	4.543
2024-03-26 17:12:45	224.01		2024-03-26 16:58:19	192.155		2024-05-21	15:11:56	2024-05-21 15:11:56	251.887		2024-05-21	14:20:19	2024-05-21 14:20:19	4.458
2024-03-26 17:13:15	223.798		2024-03-26 16:58:49	190.27		2024-05-21	15:12:26	2024-05-21 15:12:26	253.485		2024-05-21	14:20:49	2024-05-21 14:20:49	4.219
2024-03-26 17:13:45	223.371		2024-03-26 16:59:19	184.246		2024-05-21	15:12:56	2024-05-21 15:12:56	248.494		2024-05-21	14:21:19	2024-05-21 14:21:19	4.029
2024-03-26 17:14:15	222.321		2024-03-26 16:59:49	181.265		2024-05-21	15:13:26	2024-05-21 15:13:26	251.571		2024-05-21	14:21:49	2024-05-21 14:21:49	3.915
2024-03-26 17:14:45	223.096		2024-03-26 17:00:19	190.763		2024-05-21	15:13:56	2024-05-21 15:13:56	252.908		2024-05-21	14:22:19	2024-05-21 14:22:19	3.733
2024-03-26 17:15:15	221.003		2024-03-26 17:00:49	189.973		2024-05-21	15:14:26	2024-05-21 15:14:26	254.222		2024-05-21	14:22:49	2024-05-21 14:22:49	3.656
2024-03-26 17:15:45	222.593		2024-03-26 17:01:19	175.765		2024-05-21	15:14:56	2024-05-21 15:14:56	253.888		2024-05-21	14:23:19	2024-05-21 14:23:19	3.599
2024-03-26 17:16:15	222.491		2024-03-26 17:01:49	190.001		2024-05-21	15:15:26	2024-05-21 15:15:26	253.04		2024-05-21	14:23:49	2024-05-21 14:23:49	3.516
2024-03-26 17:16:45	222.112		2024-03-26 17:02:19	189.728		2024-05-21	15:15:56	2024-05-21 15:15:56	251.856		2024-05-21	14:24:19	2024-05-21 14:24:19	3.347
2024-03-26 17:17:15	222.437		2024-03-26 17:02:49	186.558		2024-05-21	15:16:26	2024-05-21 15:16:26	252.515		2024-05-21	14:24:49	2024-05-21 14:24:49	3.184
2024-03-26 17:17:45	222.307		2024-03-26 17:03:19	193.891		2024-05-21	15:16:56	2024-05-21 15:16:56	251.311		2024-05-21	14:25:19	2024-05-21 14:25:19	3.172
2024-03-26 17:18:15	220.962		2024-03-26 17:03:49	193.449		2024-05-21	15:17:26	2024-05-21 15:17:26	249.847		2024-05-21	14:25:49	2024-05-21 14:25:49	3.506
2024-03-26 17:18:45	219.134		2024-03-26 17:04:19	195.446		2024-05-21	15:17:56	2024-05-21 15:17:56	250.079		2024-05-21	14:26:19	2024-05-21 14:26:19	3.946
2024-03-26 17:19:15	218.966		2024-03-26 17:04:49	193.951		2024-05-21	15:18:26	2024-05-21 15:18:26	249.919		2024-05-21	14:26:49	2024-05-21 14:26:49	4.431
2024-03-26 17:19:45	218.649		2024-03-26 17:05:19	190.473		2024-05-21	15:18:56	2024-05-21 15:18:56	249.583		2024-05-21	14:27:19	2024-05-21 14:27:19	4.857
2024-03-26 17:20:15	218.79		2024-03-26 17:05:49	183.047		2024-05-21	15:19:26	2024-05-21 15:19:26	244.703		2024-05-21	14:27:49	2024-05-21 14:27:49	4.81
2024-03-26 17:20:45	218.795		2024-03-26 17:06:19	185.756		2024-05-21	15:19:56	2024-05-21 15:19:56	247.31		2024-05-21	14:28:19	2024-05-21 14:28:19	4.616
2024-03-26 17:21:15	217.633		2024-03-26 17:06:49	189.025		2024-05-21	15:20:26	2024-05-21 15:20:26	248.916		2024-05-21	14:28:49	2024-05-21 14:28:49	4.417
2024-03-26 17:21:45	217.423		2024-03-26 17:07:19	174.426		2024-05-21	15:20:56	2024-05-21 15:20:56	251.684		2024-05-21	14:29:19	2024-05-21 14:29:19	4.507
2024-03-26 17:22:15	215.856		2024-03-26 17:07:49	172.204		2024-05-21	15:21:26	2024-05-21 15:21:26	251.274		2024-05-21	14:29:49	2024-05-21 14:29:49	4.48
2024-03-26 17:22:45	215.606		2024-03-26 17:08:19	169.583		2024-05-21	15:21:56	2024-05-21 15:21:56	250.64		2024-05-21	14:30:19	2024-05-21 14:30:19	4.474
2024-03-26 17:23:15	216.147		2024-03-26 17:08:49	176.596		2024-05-21	15:22:26	2024-05-21 15:22:26	251.464		2024-05-21	14:30:49	2024-05-21 14:30:49	4.613
2024-03-26 17:23:45	217.024		2024-03-26 17:09:19	188.62		2024-05-21	15:22:56	2024-05-21 15:22:56	252.493		2024-05-21	14:31:19	2024-05-21 14:31:19	4.454
2024-03-26 17:24:15	218.01		2024-03-26 17:09:49	186.811		2024-05-21	15:23:26	2024-05-21 15:23:26	251.982		2024-05-21	14:31:49	2024-05-21 14:31:49	4.157
2024-03-26 17:24:45	217.709		2024-03-26 17:10:19	177.61		2024-05-21	15:23:56	2024-05-21 15:23:56	252.804		2024-05-21	14:32:19	2024-05-21 14:32:19	3.768
2024-03-26 17:25:15	216.922		2024-03-26 17:10:49	180.158		2024-05-21	15:24:26	2024-05-21 15:24:26	252.054		2024-05-21	14:32:49	2024-05-21 14:32:49	3.502
2024-03-26 17:25:45	216.975		2024-03-26 17:11:19	176.23		2024-05-21	15:24:56	2024-05-21 15:24:56	252.333		2024-05-21	14:33:19	2024-05-21 14:33:19	3.211
2024-03-26 17:26:15	216.791		2024-03-26 17:11:49	172.702		2024-05-21	15:25:26	2024-05-21 15:25:26	251.672		2024-05-21	14:33:49	2024-05-21 14:33:49	3.139
2024-03-26 17:26:45	215.711		2024-03-26 17:12:19	187.108		2024-05-21	15:25:56	2024-05-21 15:25:56	252.393		2024-05-21	14:34:19	2024-05-21 14:34:19	3.313
2024-03-26 17:27:15	215.159		2024-03-26 17:12:49	189.44		2024-05-21	15:26:26	2024-05-21 15:26:26	251.633		2024-05-21	14:34:49	2024-05-21 14:34:49	3.499
2024-03-26 17:27:45	216.116		2024-03-26 17:13:19	190.613		2024-05-21	15:26:56	2024-05-21 15:26:56	250.202		2024-05-21	14:35:19	2024-05-21 14:35:19	3.701
2024-03-26 17:28:15	215.762		2024-03-26 17:13:49	189.339		2024-05-21	15:27:26	2024-05-21 15:27:26	251.798		2024-05-21	14:35:49	2024-05-21 14:35:49	3.848
2024-03-26 17:28:45	215.23		2024-03-26 17:14:19	187.753		2024-05-21	15:27:56	2024-05-21 15:27:56	252.145		2024-05-21	14:36:19	2024-05-21 14:36:19	4.101
2024-03-26 17:29:15	214.999		2024-03-26 17:14:49	185.958		2024-05-21	15:28:26	2024-05-21 15:28:26	252.492		2024-05-21	14:36:49	2024-05-21 14:36:49	4.332
2024-03-26 17:29:45	214.287		2024-03-26 17:15:19	180.444		2024-05-21	15:28:56	2024-05-21 15:28:56	252.024		2024-05-21	14:37:19	2024-05-21 14:37:19	4.766
2024-03-26 17:30:15	213.347		2024-03-26 17:15:49	177.446		2024-05-21	15:29:26	2024-05-21 15:29:26	252.271		2024-05-21	14:37:49	2024-05-21 14:37:49	4.945
2024-03-26 17:30:45	213.991		2024-03-26 17:16:19	177.463		2024-05-21	15:29:56	2024-05-21 15:29:56	251.47		2024-05-21	14:38:19	2024-05-21 14:38:19	4.984
2024-03-26 17:31:15	213.94		2024-03-26 17:16:49	176.473		2024-05-21	15:30:26	2024-05-21 15:30:26	251.479		2024-05-21	14:38:49	2024-05-21 14:38:49	4.904
2024-03-26 17:31:45	214.869		2024-03-26 17:17:19	169.237		2024-05-21	15:30:56	2024-05-21 15:30:56	250.213		2024-05-21	14:39:19	2024-05-21 14:39:19	4.725
2024-03-26 17:32:15	214.357		2024-03-26 17:17:49	167.326		2024-05-21	15:31:26	2024-05-21 15:31:26	251.797		2024-05-21	14:39:49	2024-05-21 14:39:49	4.467
2024-03-26 17:32:45	214.083		2024-03-26 17:18:19	160.128		2024-05-21	15:31:56	2024-05-21 15:31:56	252.538		2024-05-21	14:40:19	2024-05-21 14:40:19	4.23
2024-03-26 17:33:15	210.652		2024-03-26 17:18:49	153.707		2024-05-21	15:32:26	2024-05-21 15:32:26	251.741		2024-05-21	14:40:49	2024-05-21 14:40:49	3.929
2024-03-26 17:33:45	211.396		2024-03-26 17:19:19	153.445		2024-05-21	15:32:56	2024-05-21 15:32:56	252.327		2024-05-21	14:41:19	2024-05-21 14:41:19	3.687
2024-03-26 17:34:15	211.787		2024-03-26 17:19:49	154.224		2024-05-21	15:33:26	2024-05-21 15:33:26	252.991		2024-05-21	14:41:49	2024-05-21 14:41:49	3.549
2024-03-26 17:34:45	210.796		2024-03-26 17:20:19	156.305		2024-05-21	15:33:56	2024-05-21 15:33:56	252.196		2024-05-21	14:42:19	2024-05-21 14:42:19	3.272
2024-03-26 17:35:15	211.812		2024-03-26 17:20:49	160.051		2024-05-21	15:34:26	2024-05-21 15:34:26	252.04		2024-05-21	14:42:49	2024-05-21 14:42:49	3.02
2024-03-26 17:35:45	212.463		2024-03-26 17:21:19	155.855		2024-05-21	15:34:56	2024-05-21 15:34:56	251.817		2024-05-21	14:43:19	2024-05-21 14:43:19	2.742
2024-03-26 17:36:15	210.001		2024-03-26 17:21:49	154.389		2024-05-21	15:35:26	2024-05-21 15:35:26	246.17		2024-05-21	14:43:49	2024-05-21 14:43:49	2.553
2024-03-26 17:36:45	210.433		2024-03-26 17:22:19	151.764		2024-05-21	15:35:56	2024-05-21 15:35:56	250.548		2024-05-21	14:44:19	2024-05-21 14:44:19	2.389
2024-03-26 17:37:15	211.752		2024-03-26 17:22:49	148.184		2024-05-21	15:36:26	2024-05-21 15:36:26	251.436		2024-05-21	14:44:49	2024-05-21 14:44:49	2.52
2024-03-26 17:37:45	211.877		2024-03-26 17:23:19	144.388		2024-05-21	15:36:56	2024-05-21 15:36:56	250.142		2024-05-21	14:45:19	2024-05-21 14:45:19	2.615
2024-03-26 17:38:15	211.991		2024-03-26 17:23:49	141.719		2024-05-21	15:37:26	2024-05-21 15:37:26	251.405		2024-05-21	14:45:49	2024-05-21 14:45:49	2.569
2024-03-26 17:38:45	210.687		2024-03-26 17:24:19	144.151		2024-05-21	15:37:56	2024-05-21 15:37:56	251.164		2024-05-21	14:46:19	2024-05-21 14:46:19	2.443
2024-03-26 17:39:15	210.541		2024-03-26 17:24:49	156.791		2024-05-21	15:38:26	2024-05-21 15:38:26	252.096		2024-05-21	14:46:49	2024-05-21 14:46:49	2.255
2024-03-26 17:39:45	212.544		2024-03-26 17:25:19	174.845		2024-05-21	15:38:56	2024-05-21 15:38:56	251.808		2024-05-21	14:47:19	2024-05-21 14:47:19	2.193
2024-03-26 17:40:15	210.76		2024-03-26 17:25:49	174.039		2024-05-21	15:39:26	2024-05-21 15:39:26	251.181		2024-05-21	14:47:49	2024-05-21 14:47:49	2.163
2024-03-26 17:40:45	209.257		2024-03-26 17:26:19	182.112		2024-05-21	15:39:56	2024-05-21 15:39:56	250.93		2024-05-21	14:48:19	2024-05-21 14:48:19	2.043
2024-03-26 17:41:15	209.904		2024-03-26 17:26:49	185.978		2024-05-21	15:40:26	2024-05-21 15:40:26	251.437		2024-05-21	14:48:49	2024-05-21 14:48:49	1.85
2024-03-26 17:41:45	210.624		2024-03-26 17:27:19	182.828		2024-05-21	15:40:56	2024-05-21 15:40:56	251.027		2024-05-21	14:49:19	2024-05-21 14:49:19	1.737
2024-03-26 17:42:15	210.151		2024-03-26 17:27:49	175.77		2024-05-21	15:41:26	2024-05-21 15:41:26	251.155		2024-05-21	14:49:49	2024-05-21 14:49:49	1.716
2024-03-26 17:42:45	211.321		2024-03-26 17:28:19	170.282		2024-05-21	15:41:56	2024-05-21 15:41:56	250.808		2024-05-21	14:50:19	2024-05-21 14:50:19	1.987
2024-03-26 17:43:15	210.892		2024-03-26 17:28:49	168.38		2024-05-21	15:42:26	2024-05-21 15:42:26	251.362		2024-05-21	14:50:49	2024-05-21 14:50:49	2.518
2024-03-26 17:43:45	211.893		2024-03-26 17:29:19	167.483		2024-05-21	15:42:56	2024-05-21 15:42:56	251.745		2024-05-21	14:51:19	2024-05-21 14:51:19	2.765
2024-03-26 17:44:15	211.395		2024-03-26 17:29:49	171.726		2024-05-21	15:43:26	2024-05-21 15:43:26	252.165		2024-05-21	14:51:49	2024-05-21 14:51:49	2.738
2024-03-26 17:44:45	211.066		2024-03-26 17:30:19	171.687		2024-05-21	15:43:56	2024-05-21 15:43:56	252.165		2024-05-21	14:52:19	2024-05-21 14:52:19	2.591
2024-03-26 17:45:15	210.527		2024-03-26 17:30:49	155.027		2024-05-21	15:44:26	2024-05-21 15:44:26	252.456		2024-05-21	14:52:49	2024-05-21 14:52:49	2.438
2024-03-26 17:45:45	211.08		2024-03-26 17:31:19	160.12		2024-05-21	15:44:56	2024-05-21 15:44:56	253.427		2024-05-21	14:53:19	2024-05-21 14:53:19	2.418
2024-03-26 17:46:15	212.385		2024-03-26 17:31:49	159.569		2024-05-21	15:45:26	2024-05-21 15:45:26	250.518		2024-05-21	14:53:49	2024-05-21 14:53:49	2.35
2024-03-26 17:46:45	209.835		2024-03-26 17:32:19	158.053		2024-05-21	15:45:56	2024-05-21 15:45:56	252.757		2024-05-21	14:54:19	2024-05-21 14:54:19	2.25
2024-03-26 17:47:15	208.449		2024-03-26 17:32:49	148.435		2024-05-21	15:46:26	2024-05-21 15:46:26	251.706		2024-05-21	14:54:49	2024-05-21 14:54:49	2.376
2024-03-26 17:47:45	207.748		2024-03-26 17:33:19	157.649		2024-05-21	15:46:56	2024-05-21 15:46:56	250.595		2024-05-21	14:55:19	2024-05-21 14:55:19	2.358
2024-03-26 17:48:15	210.358		2024-03-26 17:33:49	155.375		2024-05-21	15:47:26	2024-05-21 15:47:26	250.918		2024-05-21	14:55:49	2024-05-21 14:55:49	2.198
2024-03-26 17:48:45	210.174		2024-03-26 17:34:19	155.453		2024-05-21	15:47:56	2024-05-21 15:47:56	250.743		2024-05-21	14:56:19	2024-05-21 14:56:19	2.164
2024-03-26 17:49:15	209.821		2024-03-26 17:34:49	152.791		2024-05-21	15:48:26	2024-05-21 15:48:26	249.817		2024-05-21	14:56:49	2024-05-21 14:56:49	2.206
2024-03-26 17:49:45	209.312		2024-03-26 17:35:19	146.894		2024-05-21	15:48:56	2024-05-21 15:48:56	249.845		2024-05-21	14:57:19	2024-05-21 14:57:19	2.257
2024-03-26 17:50:15	207.803		2024-03-26 17:35:49	143.536		2024-05-21	15:49:26	2024-05-21 15:49:26	249.863		2024-05-21	14:57:49	2024-05-21 14:57:49	2.194
2024-03-26 17:50:45	208.876		2024-03-26 17:36:19	140.706		2024-05-21	15:49:56	2024-05-21 15:49:56	249.242		2024-05-21	14:58:19	2024-05-21 14:58:19	2.089
2024-03-26 17:51:15	208.639		2024-03-26 17:36:49	139.578		2024-05-21	15:50:26	2024-05-21 15:50:26	249.51		2024-05-21	14:58:49	2024-05-21 14:58:49	1.98
2024-03-26 17:51:45	209.22		2024-03-26 17:37:19	137.356		2024-05-21	15:50:56	2024-05-21 15:50:56	249.167		2024-05-21	14:59:19	2024-05-21 14:59:19	1.887
2024-03-26 17:52:15	208.899		2024-03-26 17:37:49	138.943		2024-05-21	15:51:26	2024-05-21 15:51:26	248.304		2024-05-21	14:59:49	2024-05-21 14:59:49	1.823
2024-03-26 17:52:45	210.517		2024-03-26 17:38:19	140.98		2024-05-21	15:51:56	2024-05-21 15:51:56	246.747		2024-05-21	15:00:19	2024-05-21 15:00:19	1.653
2024-03-26 17:53:15	209.575		2024-03-26 17:38:49	142.491		2024-05-21	15:52:26	2024-05-21 15:52:26	247.112		2024-05-21	15:00:49	2024-05-21 15:00:49	1.581
2024-03-26 17:53:45	209.624		2024-03-26 17:39:19	142.102		2024-05-21	15:52:56	2024-05-21 15:52:56	246.455		2024-05-21	15:01:19	2024-05-21 15:01:19	1.624
2024-03-26 17:54:15	207.753		2024-03-26 17:39:49	134.628		2024-05-21	15:53:26	2024-05-21 15:53:26	246.319		2024-05-21	15:01:49	2024-05-21 15:01:49	1.657
2024-03-26 17:54:45	206.681		2024-03-26 17:40:19	131.548		2024-05-21	15:53:56	2024-05-21 15:53:56	245.719		2024-05-21	15:02:19	2024-05-21 15:02:19	1.579
2024-03-26 17:55:15	208.805		2024-03-26 17:40:49	130.538		2024-05-21	15:54:26	2024-05-21 15:54:26	245.52		2024-05-21	15:02:49	2024-05-21 15:02:49	1.599
2024-03-26 17:55:45	210.065		2024-03-26 17:41:19	119.221		2024-05-21	15:54:56	2024-05-21 15:54:56	246.756		2024-05-21	15:03:19	2024-05-21 15:03:19	1.556
2024-03-26 17:56:15	206.237		2024-03-26 17:41:49	112.22		2024-05-21	15:55:26	2024-05-21 15:55:26	246.196		2024-05-21	15:03:49	2024-05-21 15:03:49	1.541
2024-03-26 17:56:45	206.309		2024-03-26 17:42:19	107.756		2024-05-21	15:55:56	2024-05-21 15:55:56	246.237		2024-05-21	15:04:19	2024-05-21 15:04:19	1.511
2024-03-26 17:57:15	207.392		2024-03-26 17:42:49	106.546		2024-05-21	15:56:26	2024-05-21 15:56:26	241.721		2024-05-21	15:04:49	2024-05-21 15:04:49	1.463
2024-03-26 17:57:45	202.29		2024-03-26 17:43:19	106.601		2024-05-21	15:56:56	2024-05-21 15:56:56	246.33		2024-05-21	15:05:19	2024-05-21 15:05:19	1.391
2024-03-26 17:58:15	208.349		2024-03-26 17:43:49	91.907		2024-05-21	15:57:26	2024-05-21 15:57:26	247.636		2024-05-21	15:05:49	2024-05-21 15:05:49	1.351
2024-03-26 17:58:45	206.127		2024-03-26 17:44:19	95.374		2024-05-21	15:57:56	2024-05-21 15:57:56	246.887		2024-05-21	15:06:19	2024-05-21 15:06:19	1.232
2024-03-26 17:59:15	205.961		2024-03-26 17:44:49	100.843		2024-05-21	15:58:26	2024-05-21 15:58:26	246.292		2024-05-21	15:06:49	2024-05-21 15:06:49	1.184
2024-03-26 17:59:45	204.244		2024-03-26 17:45:19	117.603		2024-05-21	15:58:56	2024-05-21 15:58:56	246.862		2024-05-21	15:07:19	2024-05-21 15:07:19	1.169
2024-03-26 18:00:15	207.346		2024-03-26 17:45:49	112.634		2024-05-21	15:59:26	2024-05-21 15:59:26	245.73		2024-05-21	15:07:49	2024-05-21 15:07:49	1.349
2024-03-26 18:00:45	204.235		2024-03-26 17:46:19	111.214		2024-05-21	15:59:56	2024-05-21 15:59:56	247.929		2024-05-21	15:08:19	2024-05-21 15:08:19	1.887
2024-03-26 18:01:15	202.602		2024-03-26 17:46:49	113.105		2024-05-21	16:00:26	2024-05-21 16:00:26	244.039		2024-05-21	15:08:49	2024-05-21 15:08:49	2.198
2024-03-26 18:01:45	202.294		2024-03-26 17:47:19	115.588		2024-05-21	16:00:56	2024-05-21 16:00:56	247.164		2024-05-21	15:09:19	2024-05-21 15:09:19	2.225
2024-03-26 18:02:15	201.5		2024-03-26 17:47:49	116.608		2024-05-21	16:01:26	2024-05-21 16:01:26	247.185		2024-05-21	15:09:49	2024-05-21 15:09:49	2.228
2024-03-26 18:02:45	203.197		2024-03-26 17:48:19	121.789		2024-05-21	16:01:56	2024-05-21 16:01:56	246.097		2024-05-21	15:10:19	2024-05-21 15:10:19	2.292
2024-03-26 18:03:15	204.825		2024-03-26 17:48:49	125.965		2024-05-21	16:02:26	2024-05-21 16:02:26	247.745		2024-05-21	15:10:49	2024-05-21 15:10:49	2.267
2024-03-26 18:03:45	200.637		2024-03-26 17:49:19	126.373		2024-05-21	16:02:56	2024-05-21 16:02:56	245.691		2024-05-21	15:11:19	2024-05-21 15:11:19	2.256
2024-03-26 18:04:15	202.646		2024-03-26 17:49:49	128.749		2024-05-21	16:03:26	2024-05-21 16:03:26	247.182		2024-05-21	15:11:49	2024-05-21 15:11:49	2.216
2024-03-26 18:04:45	201.781		2024-03-26 17:50:19	129.397		2024-05-21	16:03:56	2024-05-21 16:03:56	246.522		2024-05-21	15:12:19	2024-05-21 15:12:19	2.298
2024-03-26 18:05:15	201.282		2024-03-26 17:50:49	128.426		2024-05-21	16:04:26	2024-05-21 16:04:26	247.686		2024-05-21	15:12:49	2024-05-21 15:12:49	2.312
2024-03-26 18:05:45	204.894		2024-03-26 17:51:19	129.336		2024-05-21	16:04:56	2024-05-21 16:04:56	246.794		2024-05-21	15:13:19	2024-05-21 15:13:19	2.338
2024-03-26 18:06:15	207.043		2024-03-26 17:51:49	126.445		2024-05-21	16:05:26	2024-05-21 16:05:26	245.054		2024-05-21	15:13:49	2024-05-21 15:13:49	2.672
2024-03-26 18:06:45	209.38		2024-03-26 17:52:19	114.861		2024-05-21	16:05:56	2024-05-21 16:05:56	246.502		2024-05-21	15:14:19	2024-05-21 15:14:19	3.025
2024-03-26 18:07:15	207.711		2024-03-26 17:52:49	98.902		2024-05-21	16:06:26	2024-05-21 16:06:26	247.359		2024-05-21	15:14:49	2024-05-21 15:14:49	3.277
2024-03-26 18:07:45	205.963		2024-03-26 17:53:19	93.682		2024-05-21	16:06:56	2024-05-21 16:06:56	245.202		2024-05-21	15:15:19	2024-05-21 15:15:19	3.552
2024-03-26 18:08:15	205.209		2024-03-26 17:53:49	90.195		2024-05-21	16:07:26	2024-05-21 16:07:26	243.709		2024-05-21	15:15:49	2024-05-21 15:15:49	3.39
2024-03-26 18:08:45	205.013		2024-03-26 17:54:19	85.463		2024-05-21	16:07:56	2024-05-21 16:07:56	246.938		2024-05-21	15:16:19	2024-05-21 15:16:19	3.101
2024-03-26 18:09:15	206.767		2024-03-26 17:54:49	81.274		2024-05-21	16:08:26	2024-05-21 16:08:26	245.849		2024-05-21	15:16:49	2024-05-21 15:16:49	2.908
2024-03-26 18:09:45	205.592		2024-03-26 17:55:19	75.846		2024-05-21	16:08:56	2024-05-21 16:08:56	244.961		2024-05-21	15:17:19	2024-05-21 15:17:19	2.705
2024-03-26 18:10:15	203.244		2024-03-26 17:55:49	88.203		2024-05-21	16:09:26	2024-05-21 16:09:26	246.933		2024-05-21	15:17:49	2024-05-21 15:17:49	2.63
2024-03-26 18:10:45	202.395		2024-03-26 17:56:19	98.183		2024-05-21	16:09:56	2024-05-21 16:09:56	248.181		2024-05-21	15:18:19	2024-05-21 15:18:19	2.507
2024-03-26 18:11:15	203.392		2024-03-26 17:56:49	98.39		2024-05-21	16:10:26	2024-05-21 16:10:26	246.496		2024-05-21	15:18:49	2024-05-21 15:18:49	2.349
2024-03-26 18:11:45	204.241		2024-03-26 17:57:19	107.659		2024-05-21	16:10:56	2024-05-21 16:10:56	244.461		2024-05-21	15:19:19	2024-05-21 15:19:19	2.105
2024-03-26 18:12:15	203.937		2024-03-26 17:57:49	107.013		2024-05-21	16:11:26	2024-05-21 16:11:26	244.891		2024-05-21	15:19:49	2024-05-21 15:19:49	1.89
2024-03-26 18:12:45	202.692		2024-03-26 17:58:19	107.637		2024-05-21	16:11:56	2024-05-21 16:11:56	247.957		2024-05-21	15:20:19	2024-05-21 15:20:19	1.77
2024-03-26 18:13:15	202.217		2024-03-26 17:58:49	110.331		2024-05-21	16:12:26	2024-05-21 16:12:26	246.917		2024-05-21	15:20:49	2024-05-21 15:20:49	1.653
2024-03-26 18:13:45	202.712		2024-03-26 17:59:19	116.574		2024-05-21	16:12:56	2024-05-21 16:12:56	247.352		2024-05-21	15:21:19	2024-05-21 15:21:19	1.56
2024-03-26 18:14:15	201.866		2024-03-26 17:59:49	106.817		2024-05-21	16:13:26	2024-05-21 16:13:26	247.277		2024-05-21	15:21:49	2024-05-21 15:21:49	1.511
2024-03-26 18:14:45	204.411		2024-03-26 18:00:19	94.877		2024-05-21	16:13:56	2024-05-21 16:13:56	248.19		2024-05-21	15:22:19	2024-05-21 15:22:19	1.565
2024-03-26 18:15:15	203.213		2024-03-26 18:00:49	88.82		2024-05-21	16:14:26	2024-05-21 16:14:26	249.634		2024-05-21	15:22:49	2024-05-21 15:22:49	1.653
2024-03-26 18:15:45	206.156		2024-03-26 18:01:19	98.256		2024-05-21	16:14:56	2024-05-21 16:14:56	248.58		2024-05-21	15:23:19	2024-05-21 15:23:19	1.673
2024-03-26 18:16:15	203.492		2024-03-26 18:01:49	102.444		2024-05-21	16:15:26	2024-05-21 16:15:26	246.775		2024-05-21	15:23:49	2024-05-21 15:23:49	1.657
2024-03-26 18:16:45	204.796		2024-03-26 18:02:19	102.534		2024-05-21	16:15:56	2024-05-21 16:15:56	247.612		2024-05-21	15:24:19	2024-05-21 15:24:19	1.597
2024-03-26 18:17:15	208.977		2024-03-26 18:02:49	104.206		2024-05-21	16:16:26	2024-05-21 16:16:26	247.508		2024-05-21	15:24:49	2024-05-21 15:24:49	1.594
2024-03-26 18:17:45	211.392		2024-03-26 18:03:19	107.794		2024-05-21	16:16:56	2024-05-21 16:16:56	247.061		2024-05-21	15:25:19	2024-05-21 15:25:19	1.595
2024-03-26 18:18:15	206.853		2024-03-26 18:03:49	104.919		2024-05-21	16:17:26	2024-05-21 16:17:26	246.419		2024-05-21	15:25:49	2024-05-21 15:25:49	1.558
2024-03-26 18:18:45	204.319		2024-03-26 18:04:19	120.618		2024-05-21	16:17:56	2024-05-21 16:17:56	247.127		2024-05-21	15:26:19	2024-05-21 15:26:19	1.544
2024-03-26 18:19:15	206.471		2024-03-26 18:04:49	121.526		2024-05-21	16:18:26	2024-05-21 16:18:26	246.329		2024-05-21	15:26:49	2024-05-21 15:26:49	1.562
2024-03-26 18:19:45	209.895		2024-03-26 18:05:19	133.835		2024-05-21	16:18:56	2024-05-21 16:18:56	247.236		2024-05-21	15:27:19	2024-05-21 15:27:19	1.638
2024-03-26 18:20:15	208.599		2024-03-26 18:05:49	132.04		2024-05-21	16:19:26	2024-05-21 16:19:26	248.191		2024-05-21	15:27:49	2024-05-21 15:27:49	1.775
2024-03-26 18:20:45	209.151		2024-03-26 18:06:19	125.378		2024-05-21	16:19:56	2024-05-21 16:19:56	248.523		2024-05-21	15:28:19	2024-05-21 15:28:19	1.914
2024-03-26 18:21:15	205.053		2024-03-26 18:06:49	124.022		2024-05-21	16:20:26	2024-05-21 16:20:26	247.635		2024-05-21	15:28:49	2024-05-21 15:28:49	1.973
2024-03-26 18:21:45	206.309		2024-03-26 18:07:19	126.409		2024-05-21	16:20:56	2024-05-21 16:20:56	247.764		2024-05-21	15:29:19	2024-05-21 15:29:19	1.939
2024-03-26 18:22:15	201.531		2024-03-26 18:07:49	127.658		2024-05-21	16:21:26	2024-05-21 16:21:26	248.329		2024-05-21	15:29:49	2024-05-21 15:29:49	1.828
2024-03-26 18:22:45	201.118		2024-03-26 18:08:19	125.871		2024-05-21	16:21:56	2024-05-21 16:21:56	249.287		2024-05-21	15:30:19	2024-05-21 15:30:19	1.625
2024-03-26 18:23:15	200.942		2024-03-26 18:08:49	121.446		2024-05-21	16:22:26	2024-05-21 16:22:26	249.157		2024-05-21	15:30:49	2024-05-21 15:30:49	1.513
2024-03-26 18:23:45	203.277		2024-03-26 18:09:19	107.772		2024-05-21	16:22:56	2024-05-21 16:22:56	248.648		2024-05-21	15:31:19	2024-05-21 15:31:19	1.471
2024-03-26 18:24:15	201.457		2024-03-26 18:09:49	109.551		2024-05-21	16:23:26	2024-05-21 16:23:26	246.396		2024-05-21	15:31:49	2024-05-21 15:31:49	1.511
2024-03-26 18:24:45	203.213		2024-03-26 18:10:19	110.225		2024-05-21	16:23:56	2024-05-21 16:23:56	247.458		2024-05-21	15:32:19	2024-05-21 15:32:19	1.617
2024-03-26 18:25:15	206.873		2024-03-26 18:10:49	110.017		2024-05-21	16:24:26	2024-05-21 16:24:26	249.505		2024-05-21	15:32:49	2024-05-21 15:32:49	1.659
2024-03-26 18:25:45	204.847		2024-03-26 18:11:19	106.613		2024-05-21	16:24:56	2024-05-21 16:24:56	245.558		2024-05-21	15:33:19	2024-05-21 15:33:19	1.72
2024-03-26 18:26:15	203.842		2024-03-26 18:11:49	99.526		2024-05-21	16:25:26	2024-05-21 16:25:26	246.856		2024-05-21	15:33:49	2024-05-21 15:33:49	1.768
2024-03-26 18:26:45	206.235		2024-03-26 18:12:19	100.131		2024-05-21	16:25:56	2024-05-21 16:25:56	247.112		2024-05-21	15:34:19	2024-05-21 15:34:19	1.638
2024-03-26 18:27:15	211.012		2024-03-26 18:12:49	99.593		2024-05-21	16:26:26	2024-05-21 16:26:26	247.947		2024-05-21	15:34:49	2024-05-21 15:34:49	1.477
2024-03-26 18:27:45	206.995		2024-03-26 18:13:19	100.5		2024-05-21	16:26:56	2024-05-21 16:26:56	247.889		2024-05-21	15:35:19	2024-05-21 15:35:19	1.368
2024-03-26 18:28:15	208.422		2024-03-26 18:13:49	97.459		2024-05-21	16:27:26	2024-05-21 16:27:26	246.92		2024-05-21	15:35:49	2024-05-21 15:35:49	1.321
2024-03-26 18:28:45	209.58		2024-03-26 18:14:19	92.05		2024-05-21	16:27:56	2024-05-21 16:27:56	246.635		2024-05-21	15:36:19	2024-05-21 15:36:19	1.258
2024-03-26 18:29:15	209.637		2024-03-26 18:14:49	84.986		2024-05-21	16:28:26	2024-05-21 16:28:26	246.765		2024-05-21	15:36:49	2024-05-21 15:36:49	1.186
2024-03-26 18:29:45	209.261		2024-03-26 18:15:19	78.826		2024-05-21	16:28:56	2024-05-21 16:28:56	247.622		2024-05-21	15:37:19	2024-05-21 15:37:19	1.111
2024-03-26 18:30:15	205.279		2024-03-26 18:15:49	78.112		2024-05-21	16:29:26	2024-05-21 16:29:26	247.74		2024-05-21	15:37:49	2024-05-21 15:37:49	1.045
2024-03-26 18:30:45	205.839		2024-03-26 18:16:19	74.468		2024-05-21	16:29:56	2024-05-21 16:29:56	246.904		2024-05-21	15:38:19	2024-05-21 15:38:19	1.028
2024-03-26 18:31:15	204.455		2024-03-26 18:16:49	71.56		2024-05-21	16:30:26	2024-05-21 16:30:26	247.784		2024-05-21	15:38:49	2024-05-21 15:38:49	0.969
2024-03-26 18:31:45	208.631		2024-03-26 18:17:19	72.083		2024-05-21	16:30:56	2024-05-21 16:30:56	246.225		2024-05-21	15:39:19	2024-05-21 15:39:19	0.941
2024-03-26 18:32:15	203.492		2024-03-26 18:17:49	71.747		2024-05-21	16:31:26	2024-05-21 16:31:26	246.634		2024-05-21	15:39:49	2024-05-21 15:39:49	0.893
2024-03-26 18:32:45	204.872		2024-03-26 18:18:19	72.798		2024-05-21	16:31:56	2024-05-21 16:31:56	247.106		2024-05-21	15:40:19	2024-05-21 15:40:19	0.918
2024-03-26 18:33:15	202.364		2024-03-26 18:18:49	73.758		2024-05-21	16:32:26	2024-05-21 16:32:26	246.051		2024-05-21	15:40:49	2024-05-21 15:40:49	0.964
2024-03-26 18:33:45	206.167		2024-03-26 18:19:19	73.82		2024-05-21	16:32:56	2024-05-21 16:32:56	246.717		2024-05-21	15:41:19	2024-05-21 15:41:19	1.036
2024-03-26 18:34:15	197.527		2024-03-26 18:19:49	73.293		2024-05-21	16:33:26	2024-05-21 16:33:26	246.863		2024-05-21	15:41:49	2024-05-21 15:41:49	1.075
2024-03-26 18:34:45	196.948		2024-03-26 18:20:19	71.328		2024-05-21	16:33:56	2024-05-21 16:33:56	248.86		2024-05-21	15:42:19	2024-05-21 15:42:19	1.055
2024-03-26 18:35:15	197.508		2024-03-26 18:20:49	70.495		2024-05-21	16:34:26	2024-05-21 16:34:26	249.18		2024-05-21	15:42:49	2024-05-21 15:42:49	1.053
2024-03-26 18:35:45	196.093		2024-03-26 18:21:19	66.417		2024-05-21	16:34:56	2024-05-21 16:34:56	248.396		2024-05-21	15:43:19	2024-05-21 15:43:19	1.041
2024-03-26 18:36:15	198.896		2024-03-26 18:21:49	71.323		2024-05-21	16:35:26	2024-05-21 16:35:26	249.772		2024-05-21	15:43:49	2024-05-21 15:43:49	1.078
2024-03-26 18:36:45	199.614		2024-03-26 18:22:19	72.583		2024-05-21	16:35:56	2024-05-21 16:35:56	250.285		2024-05-21	15:44:19	2024-05-21 15:44:19	1.058
2024-03-26 18:37:15	199.614		2024-03-26 18:22:49	76.783		2024-05-21	16:36:26	2024-05-21 16:36:26	249.714		2024-05-21	15:44:49	2024-05-21 15:44:49	1.061
2024-03-26 18:37:45	197.546		2024-03-26 18:23:19	75.734		2024-05-21	16:36:56	2024-05-21 16:36:56	250.614		2024-05-21	15:45:19	2024-05-21 15:45:19	1.017
2024-03-26 18:38:15	196.055		2024-03-26 18:23:49	80.044		2024-05-21	16:37:26	2024-05-21 16:37:26	249.355		2024-05-21	15:45:49	2024-05-21 15:45:49	0.973
2024-03-26 18:38:45	193.583		2024-03-26 18:24:19	82.694		2024-05-21	16:37:56	2024-05-21 16:37:56	246.776		2024-05-21	15:46:19	2024-05-21 15:46:19	0.954
2024-03-26 18:39:15	188.775		2024-03-26 18:24:49	84.053		2024-05-21	16:38:26	2024-05-21 16:38:26	248.329		2024-05-21	15:46:49	2024-05-21 15:46:49	0.957
2024-03-26 18:39:45	194.654		2024-03-26 18:25:19	85.495		2024-05-21	16:38:56	2024-05-21 16:38:56	247.726		2024-05-21	15:47:19	2024-05-21 15:47:19	1.125
2024-03-26 18:40:15	194.79		2024-03-26 18:25:49	86.077		2024-05-21	16:39:26	2024-05-21 16:39:26	247.557		2024-05-21	15:47:49	2024-05-21 15:47:49	1.472
2024-03-26 18:40:45	192.319		2024-03-26 18:26:19	85.61		2024-05-21	16:39:56	2024-05-21 16:39:56	247.706		2024-05-21	15:48:19	2024-05-21 15:48:19	2.127
2024-03-26 18:41:15	189.408		2024-03-26 18:26:49	85.239		2024-05-21	16:40:26	2024-05-21 16:40:26	246.783		2024-05-21	15:48:49	2024-05-21 15:48:49	2.462
2024-03-26 18:41:45	189.058		2024-03-26 18:27:19	80.558		2024-05-21	16:40:56	2024-05-21 16:40:56	247.513		2024-05-21	15:49:19	2024-05-21 15:49:19	3.363
2024-03-26 18:42:15	192.664		2024-03-26 18:27:49	76.146		2024-05-21	16:41:26	2024-05-21 16:41:26	248.567		2024-05-21	15:49:49	2024-05-21 15:49:49	3.674
2024-03-26 18:42:45	188.499		2024-03-26 18:28:19	78.3		2024-05-21	16:41:56	2024-05-21 16:41:56	247.257		2024-05-21	15:50:19	2024-05-21 15:50:19	3.82
2024-03-26 18:43:15	195.671		2024-03-26 18:28:49	76.267		2024-05-21	16:42:26	2024-05-21 16:42:26	248.877		2024-05-21	15:50:49	2024-05-21 15:50:49	4.101
2024-03-26 18:43:45	195.623		2024-03-26 18:29:19	77.497		2024-05-21	16:42:56	2024-05-21 16:42:56	247.368		2024-05-21	15:51:19	2024-05-21 15:51:19	4.294
2024-03-26 18:44:15	195.216		2024-03-26 18:29:49	73.92		2024-05-21	16:43:26	2024-05-21 16:43:26	246.409		2024-05-21	15:51:49	2024-05-21 15:51:49	4.655
2024-03-26 18:44:45	195.292		2024-03-26 18:30:19	75.806		2024-05-21	16:43:56	2024-05-21 16:43:56	246.69		2024-05-21	15:52:19	2024-05-21 15:52:19	5.305
2024-03-26 18:45:15	201.134		2024-03-26 18:30:49	75.93		2024-05-21	16:44:26	2024-05-21 16:44:26	247.511		2024-05-21	15:52:49	2024-05-21 15:52:49	6.232
2024-03-26 18:45:45	197.911		2024-03-26 18:31:19	70.038		2024-05-21	16:44:56	2024-05-21 16:44:56	248.377		2024-05-21	15:53:19	2024-05-21 15:53:19	6.707
2024-03-26 18:46:15	193.396		2024-03-26 18:31:49	66.216		2024-05-21	16:45:26	2024-05-21 16:45:26	247.393		2024-05-21	15:53:49	2024-05-21 15:53:49	6.814
2024-03-26 18:46:45	190.34		2024-03-26 18:32:19	67.412		2024-05-21	16:45:56	2024-05-21 16:45:56	242.945		2024-05-21	15:54:19	2024-05-21 15:54:19	6.63
2024-03-26 18:47:15	190.501		2024-03-26 18:32:49	67.025		2024-05-21	16:46:26	2024-05-21 16:46:26	246.493		2024-05-21	15:54:49	2024-05-21 15:54:49	6.427
2024-03-26 18:47:45	187.339		2024-03-26 18:33:19	70.37		2024-05-21	16:46:56	2024-05-21 16:46:56	247.559		2024-05-21	15:55:19	2024-05-21 15:55:19	6.131
2024-03-26 18:48:15	187.07		2024-03-26 18:33:49	72.384		2024-05-21	16:47:26	2024-05-21 16:47:26	248.689		2024-05-21	15:55:49	2024-05-21 15:55:49	5.935
2024-03-26 18:48:45	183.149		2024-03-26 18:34:19	68.885		2024-05-21	16:47:56	2024-05-21 16:47:56	248.404		2024-05-21	15:56:19	2024-05-21 15:56:19	5.728
2024-03-26 18:49:15	184.453		2024-03-26 18:34:49	66.064		2024-05-21	16:48:26	2024-05-21 16:48:26	248.195		2024-05-21	15:56:49	2024-05-21 15:56:49	5.474
2024-03-26 18:49:45	188.517		2024-03-26 18:35:19	68.913		2024-05-21	16:48:56	2024-05-21 16:48:56	243.789		2024-05-21	15:57:19	2024-05-21 15:57:19	5.403
2024-03-26 18:50:15	189.312		2024-03-26 18:35:49	70.751		2024-05-21	16:49:26	2024-05-21 16:49:26	246.402		2024-05-21	15:57:49	2024-05-21 15:57:49	5.626
2024-03-26 18:50:45	186.086		2024-03-26 18:36:19	68.609		2024-05-21	16:49:56	2024-05-21 16:49:56	246.663		2024-05-21	15:58:19	2024-05-21 15:58:19	5.652
2024-03-26 18:51:15	190.244		2024-03-26 18:36:49	62.545		2024-05-21	16:50:26	2024-05-21 16:50:26	244.883		2024-05-21	15:58:49	2024-05-21 15:58:49	5.569
2024-03-26 18:51:45	185.051		2024-03-26 18:37:19	62.219		2024-05-21	16:50:56	2024-05-21 16:50:56	245.393		2024-05-21	15:59:19	2024-05-21 15:59:19	5.364
2024-03-26 18:52:15	181.881		2024-03-26 18:37:49	62.884		2024-05-21	16:51:26	2024-05-21 16:51:26	245.298		2024-05-21	15:59:49	2024-05-21 15:59:49	5.321
2024-03-26 18:52:45	184.546		2024-03-26 18:38:19	60.071		2024-05-21	16:51:56	2024-05-21 16:51:56	243.445		2024-05-21	16:00:19	2024-05-21 16:00:19	5.199
2024-03-26 18:53:15	190.006		2024-03-26 18:38:49	58.365		2024-05-21	16:52:26	2024-05-21 16:52:26	241.525		2024-05-21	16:00:49	2024-05-21 16:00:49	5
2024-03-26 18:53:45	190.106		2024-03-26 18:39:19	58.096		2024-05-21	16:52:56	2024-05-21 16:52:56	243.478		2024-05-21	16:01:19	2024-05-21 16:01:19	4.804
2024-03-26 18:54:15	184.052		2024-03-26 18:39:49	59.131		2024-05-21	16:53:26	2024-05-21 16:53:26	243.179		2024-05-21	16:01:49	2024-05-21 16:01:49	4.631
2024-03-26 18:54:45	186.34		2024-03-26 18:40:19	58.917		2024-05-21	16:53:56	2024-05-21 16:53:56	242.81		2024-05-21	16:02:19	2024-05-21 16:02:19	4.397
2024-03-26 18:55:15	191.607		2024-03-26 18:40:49	59.05		2024-05-21	16:54:26	2024-05-21 16:54:26	242.684		2024-05-21	16:02:49	2024-05-21 16:02:49	4.217
2024-03-26 18:55:45	196.665		2024-03-26 18:41:19	55.278		2024-05-21	16:54:56	2024-05-21 16:54:56	242.361		2024-05-21	16:03:19	2024-05-21 16:03:19	4.008
2024-03-26 18:56:15	199.804		2024-03-26 18:41:49	60.968		2024-05-21	16:55:26	2024-05-21 16:55:26	240.534		2024-05-21	16:03:49	2024-05-21 16:03:49	3.797
2024-03-26 18:56:45	197.124		2024-03-26 18:42:19	56.56		2024-05-21	16:55:56	2024-05-21 16:55:56	243.81		2024-05-21	16:04:19	2024-05-21 16:04:19	3.602
2024-03-26 18:57:15	192.422		2024-03-26 18:42:49	57.913		2024-05-21	16:56:26	2024-05-21 16:56:26	243.239		2024-05-21	16:04:49	2024-05-21 16:04:49	3.432
2024-03-26 18:57:45	191.371		2024-03-26 18:43:19	59.171		2024-05-21	16:56:56	2024-05-21 16:56:56	240.365		2024-05-21	16:05:19	2024-05-21 16:05:19	3.331
2024-03-26 18:58:15	193.616		2024-03-26 18:43:49	59.135		2024-05-21	16:57:26	2024-05-21 16:57:26	243.853		2024-05-21	16:05:49	2024-05-21 16:05:49	3.324
2024-03-26 18:58:45	192.999		2024-03-26 18:44:19	60.317		2024-05-21	16:57:56	2024-05-21 16:57:56	245.277		2024-05-21	16:06:19	2024-05-21 16:06:19	3.201
2024-03-26 18:59:15	195.103		2024-03-26 18:44:49	57.642		2024-05-21	16:58:26	2024-05-21 16:58:26	244.749		2024-05-21	16:06:49	2024-05-21 16:06:49	3.168
2024-03-26 18:59:45	191.644		2024-03-26 18:45:19	57.323		2024-05-21	16:58:56	2024-05-21 16:58:56	245.231		2024-05-21	16:07:19	2024-05-21 16:07:19	3.224
2024-03-26 19:00:15	193.066		2024-03-26 18:45:49	59.159		2024-05-21	16:59:26	2024-05-21 16:59:26	244.709		2024-05-21	16:07:49	2024-05-21 16:07:49	3.274
2024-03-26 19:00:45	199.236		2024-03-26 18:46:19	62.69		2024-05-21	16:59:56	2024-05-21 16:59:56	245.409		2024-05-21	16:08:19	2024-05-21 16:08:19	3.05
2024-03-26 19:01:15	193.598		2024-03-26 18:46:49	64.763		2024-05-21	17:00:26	2024-05-21 17:00:26	246.152		2024-05-21	16:08:49	2024-05-21 16:08:49	2.869
2024-03-26 19:01:45	189.276		2024-03-26 18:47:19	63.258		2024-05-21	17:00:56	2024-05-21 17:00:56	246.417		2024-05-21	16:09:19	2024-05-21 16:09:19	2.751
2024-03-26 19:02:15	189.112		2024-03-26 18:47:49	58.044		2024-05-21	17:01:26	2024-05-21 17:01:26	247.584		2024-05-21	16:09:49	2024-05-21 16:09:49	2.585
2024-03-26 19:02:45	185.019		2024-03-26 18:48:19	56.094		2024-05-21	17:01:56	2024-05-21 17:01:56	246.239		2024-05-21	16:10:19	2024-05-21 16:10:19	2.417
2024-03-26 19:03:15	183.087		2024-03-26 18:48:49	56.263		2024-05-21	17:02:26	2024-05-21 17:02:26	246.755		2024-05-21	16:10:49	2024-05-21 16:10:49	2.385
2024-03-26 19:03:45	187.098		2024-03-26 18:49:19	52.568		2024-05-21	17:02:56	2024-05-21 17:02:56	245.964		2024-05-21	16:11:19	2024-05-21 16:11:19	2.338
2024-03-26 19:04:15	188.731		2024-03-26 18:49:49	51.216		2024-05-21	17:03:26	2024-05-21 17:03:26	244.497		2024-05-21	16:11:49	2024-05-21 16:11:49	2.316
2024-03-26 19:04:45	183.815		2024-03-26 18:50:19	52.188		2024-05-21	17:03:56	2024-05-21 17:03:56	246.545		2024-05-21	16:12:19	2024-05-21 16:12:19	2.247
2024-03-26 19:05:15	182.887		2024-03-26 18:50:49	53.702		2024-05-21	17:04:26	2024-05-21 17:04:26	245.785		2024-05-21	16:12:49	2024-05-21 16:12:49	2.138
2024-03-26 19:05:45	187.214		2024-03-26 18:51:19	61.75		2024-05-21	17:04:56	2024-05-21 17:04:56	245.869		2024-05-21	16:13:19	2024-05-21 16:13:19	2.009
2024-03-26 19:06:15	185.939		2024-03-26 18:51:49	61.977		2024-05-21	17:05:26	2024-05-21 17:05:26	246.384		2024-05-21	16:13:49	2024-05-21 16:13:49	1.895
2024-03-26 19:06:45	187.898		2024-03-26 18:52:19	61.625		2024-05-21	17:05:56	2024-05-21 17:05:56	247.127		2024-05-21	16:14:19	2024-05-21 16:14:19	1.724
2024-03-26 19:07:15	188.876		2024-03-26 18:52:49	58.165		2024-05-21	17:06:26	2024-05-21 17:06:26	247.061		2024-05-21	16:14:49	2024-05-21 16:14:49	1.581
2024-03-26 19:07:45	192.162		2024-03-26 18:53:19	58.399		2024-05-21	17:06:56	2024-05-21 17:06:56	247.215		2024-05-21	16:15:19	2024-05-21 16:15:19	1.529
2024-03-26 19:08:15	191.847		2024-03-26 18:53:49	59.552		2024-05-21	17:07:26	2024-05-21 17:07:26	247.314		2024-05-21	16:15:49	2024-05-21 16:15:49	1.511
2024-03-26 19:08:45	196.948		2024-03-26 18:54:19	61.423		2024-05-21	17:07:56	2024-05-21 17:07:56	246.215		2024-05-21	16:16:19	2024-05-21 16:16:19	1.456
2024-03-26 19:09:15	195.444		2024-03-26 18:54:49	61.725		2024-05-21	17:08:26	2024-05-21 17:08:26	246.343		2024-05-21	16:16:49	2024-05-21 16:16:49	1.358
2024-03-26 19:09:45	191.444		2024-03-26 18:55:19	62.104		2024-05-21	17:08:56	2024-05-21 17:08:56	247.6		2024-05-21	16:17:19	2024-05-21 16:17:19	1.24
2024-03-26 19:10:15	187.988		2024-03-26 18:55:49	62.378		2024-05-21	17:09:26	2024-05-21 17:09:26	247.006		2024-05-21	16:17:49	2024-05-21 16:17:49	1.149
2024-03-26 19:10:45	189.116		2024-03-26 18:56:19	61.702		2024-05-21	17:09:56	2024-05-21 17:09:56	247.621		2024-05-21	16:18:19	2024-05-21 16:18:19	1.081
2024-03-26 19:11:15	194.65		2024-03-26 18:56:49	48.231		2024-05-21	17:10:26	2024-05-21 17:10:26	246.898		2024-05-21	16:18:49	2024-05-21 16:18:49	1.032
2024-03-26 19:11:45	195.372		2024-03-26 18:57:19	53.349		2024-05-21	17:10:56	2024-05-21 17:10:56	247.391		2024-05-21	16:19:19	2024-05-21 16:19:19	0.969
2024-03-26 19:12:15	191.053		2024-03-26 18:57:49	58.278		2024-05-21	17:11:26	2024-05-21 17:11:26	247.166		2024-05-21	16:19:49	2024-05-21 16:19:49	0.877
2024-03-26 19:12:45	189.923		2024-03-26 18:58:19	53.296		2024-05-21	17:11:56	2024-05-21 17:11:56	248.023		2024-05-21	16:20:19	2024-05-21 16:20:19	0.806
2024-03-26 19:13:15	191.656		2024-03-26 18:58:49	48.939		2024-05-21	17:12:26	2024-05-21 17:12:26	248.697		2024-05-21	16:20:49	2024-05-21 16:20:49	0.811
2024-03-26 19:13:45	193.75		2024-03-26 18:59:19	52.351		2024-05-21	17:12:56	2024-05-21 17:12:56	248.108		2024-05-21	16:21:19	2024-05-21 16:21:19	0.766
2024-03-26 19:14:15	193.614		2024-03-26 18:59:49	58.943		2024-05-21	17:13:26	2024-05-21 17:13:26	248.763		2024-05-21	16:21:49	2024-05-21 16:21:49	0.707
2024-03-26 19:14:45	193.952		2024-03-26 19:00:19	59.539		2024-05-21	17:13:56	2024-05-21 17:13:56	246.813		2024-05-21	16:22:19	2024-05-21 16:22:19	0.71
2024-03-26 19:15:15	189.771		2024-03-26 19:00:49	61.228		2024-05-21	17:14:26	2024-05-21 17:14:26	247.812		2024-05-21	16:22:49	2024-05-21 16:22:49	0.691
2024-03-26 19:15:45	191.18		2024-03-26 19:01:19	59.539		2024-05-21	17:14:56	2024-05-21 17:14:56	246.886		2024-05-21	16:23:19	2024-05-21 16:23:19	0.68
2024-03-26 19:16:15	191.402		2024-03-26 19:01:49	58.995		2024-05-21	17:15:26	2024-05-21 17:15:26	246.846		2024-05-21	16:23:49	2024-05-21 16:23:49	0.656
2024-03-26 19:16:45	194.148		2024-03-26 19:02:19	55.176		2024-05-21	17:15:56	2024-05-21 17:15:56	248.052		2024-05-21	16:24:19	2024-05-21 16:24:19	0.66
2024-03-26 19:17:15	192.95		2024-03-26 19:02:49	56.486		2024-05-21	17:16:26	2024-05-21 17:16:26	248.584		2024-05-21	16:24:49	2024-05-21 16:24:49	0.633
2024-03-26 19:17:45	195.17		2024-03-26 19:03:19	56.172		2024-05-21	17:16:56	2024-05-21 17:16:56	247.595		2024-05-21	16:25:19	2024-05-21 16:25:19	0.643
2024-03-26 19:18:15	197.779		2024-03-26 19:03:49	56.239		2024-05-21	17:17:26	2024-05-21 17:17:26	246.784		2024-05-21	16:25:49	2024-05-21 16:25:49	0.643
2024-03-26 19:18:45	199.15		2024-03-26 19:04:19	56.195		2024-05-21	17:17:56	2024-05-21 17:17:56	247.019		2024-05-21	16:26:19	2024-05-21 16:26:19	0.611
2024-03-26 19:19:15	198.864		2024-03-26 19:04:49	58.244		2024-05-21	17:18:26	2024-05-21 17:18:26	246.98		2024-05-21	16:26:49	2024-05-21 16:26:49	0.602
2024-03-26 19:19:45	198.419		2024-03-26 19:05:19	56.285		2024-05-21	17:18:56	2024-05-21 17:18:56	246.735		2024-05-21	16:27:19	2024-05-21 16:27:19	0.629
2024-03-26 19:20:15	197.491		2024-03-26 19:05:49	51.835		2024-05-21	17:19:26	2024-05-21 17:19:26	246.131		2024-05-21	16:27:49	2024-05-21 16:27:49	0.622
2024-03-26 19:20:45	198.087		2024-03-26 19:06:19	51.711		2024-05-21	17:19:56	2024-05-21 17:19:56	244.803		2024-05-21	16:28:19	2024-05-21 16:28:19	0.62
2024-03-26 19:21:15	196.481		2024-03-26 19:06:49	50.568		2024-05-21	17:20:26	2024-05-21 17:20:26	244.632		2024-05-21	16:28:49	2024-05-21 16:28:49	0.593
2024-03-26 19:21:45	196.271		2024-03-26 19:07:19	48.844		2024-05-21	17:20:56	2024-05-21 17:20:56	244.616		2024-05-21	16:29:19	2024-05-21 16:29:19	0.644
2024-03-26 19:22:15	202.818		2024-03-26 19:07:49	48.381		2024-05-21	17:21:26	2024-05-21 17:21:26	244.986		2024-05-21	16:29:49	2024-05-21 16:29:49	0.67
2024-03-26 19:22:45	201.581		2024-03-26 19:08:19	47.877		2024-05-21	17:21:56	2024-05-21 17:21:56	244.311		2024-05-21	16:30:19	2024-05-21 16:30:19	0.655
2024-03-26 19:23:15	205.474		2024-03-26 19:08:49	48.372		2024-05-21	17:22:26	2024-05-21 17:22:26	244.982		2024-05-21	16:30:49	2024-05-21 16:30:49	0.662
2024-03-26 19:23:45	209.852		2024-03-26 19:09:19	52.006		2024-05-21	17:22:56	2024-05-21 17:22:56	245.518		2024-05-21	16:31:19	2024-05-21 16:31:19	0.655
2024-03-26 19:24:15	207.807		2024-03-26 19:09:49	55.482		2024-05-21	17:23:26	2024-05-21 17:23:26	245.378		2024-05-21	16:31:49	2024-05-21 16:31:49	0.655
2024-03-26 19:24:45	204.486		2024-03-26 19:10:19	56.657		2024-05-21	17:23:56	2024-05-21 17:23:56	245.972		2024-05-21	16:32:19	2024-05-21 16:32:19	0.648
2024-03-26 19:25:15	201.599		2024-03-26 19:10:49	59.969		2024-05-21	17:24:26	2024-05-21 17:24:26	244.019		2024-05-21	16:32:49	2024-05-21 16:32:49	0.626
2024-03-26 19:25:45	200.774		2024-03-26 19:11:19	63.218		2024-05-21	17:24:56	2024-05-21 17:24:56	244.84		2024-05-21	16:33:19	2024-05-21 16:33:19	0.653
2024-03-26 19:26:15	207.463		2024-03-26 19:11:49	59.938		2024-05-21	17:25:26	2024-05-21 17:25:26	244.298		2024-05-21	16:33:49	2024-05-21 16:33:49	0.628
2024-03-26 19:26:45	207.433		2024-03-26 19:12:19	58.244		2024-05-21	17:25:56	2024-05-21 17:25:56	244.015		2024-05-21	16:34:19	2024-05-21 16:34:19	0.614
2024-03-26 19:27:15	206.071		2024-03-26 19:12:49	39.655		2024-05-21	17:26:26	2024-05-21 17:26:26	243.1		2024-05-21	16:34:49	2024-05-21 16:34:49	0.621
2024-03-26 19:27:45	206.276		2024-03-26 19:13:19	38.582		2024-05-21	17:26:56	2024-05-21 17:26:56	242.987		2024-05-21	16:35:19	2024-05-21 16:35:19	0.628
2024-03-26 19:28:15	209.002		2024-03-26 19:13:49	113.715		2024-05-21	17:27:26	2024-05-21 17:27:26	244.187		2024-05-21	16:35:49	2024-05-21 16:35:49	0.597
2024-03-26 19:28:45	210.83		2024-03-26 19:14:19	121.397		2024-05-21	17:27:56	2024-05-21 17:27:56	244.286		2024-05-21	16:36:19	2024-05-21 16:36:19	0.609
2024-03-26 19:29:15	208.408		2024-03-26 19:14:49	128.512		2024-05-21	17:28:26	2024-05-21 17:28:26	244.896		2024-05-21	16:36:49	2024-05-21 16:36:49	0.636
2024-03-26 19:29:45	208.507		2024-03-26 19:15:19	125.661		2024-05-21	17:28:56	2024-05-21 17:28:56	245.294		2024-05-21	16:37:19	2024-05-21 16:37:19	0.622
2024-03-26 19:30:15	209.087		2024-03-26 19:15:49	135.612		2024-05-21	17:29:26	2024-05-21 17:29:26	245.09		2024-05-21	16:37:49	2024-05-21 16:37:49	0.615
2024-03-26 19:30:45	208.692		2024-03-26 19:16:19	132.054		2024-05-21	17:29:56	2024-05-21 17:29:56	245.284		2024-05-21	16:38:19	2024-05-21 16:38:19	0.629
2024-03-26 19:31:15	206.412		2024-03-26 19:16:49	129.004		2024-05-21	17:30:26	2024-05-21 17:30:26	244.083		2024-05-21	16:38:49	2024-05-21 16:38:49	0.641
2024-03-26 19:31:45	205.47		2024-03-26 19:17:19	133.749		2024-05-21	17:30:56	2024-05-21 17:30:56	242.06		2024-05-21	16:39:19	2024-05-21 16:39:19	0.666
2024-03-26 19:32:15	207.693		2024-03-26 19:17:49	130.753		2024-05-21	17:31:26	2024-05-21 17:31:26	244.328		2024-05-21	16:39:49	2024-05-21 16:39:49	0.673
2024-03-26 19:32:45	207.391		2024-03-26 19:18:19	122.52		2024-05-21	17:31:56	2024-05-21 17:31:56	241.936		2024-05-21	16:40:19	2024-05-21 16:40:19	0.695
2024-03-26 19:33:15	208.582		2024-03-26 19:18:49	117.436		2024-05-21	17:32:26	2024-05-21 17:32:26	244.387		2024-05-21	16:40:49	2024-05-21 16:40:49	0.658
2024-03-26 19:33:45	208.635		2024-03-26 19:19:19	116.186		2024-05-21	17:32:56	2024-05-21 17:32:56	245.013		2024-05-21	16:41:19	2024-05-21 16:41:19	0.671
2024-03-26 19:34:15	210.38		2024-03-26 19:19:49	113.013		2024-05-21	17:33:26	2024-05-21 17:33:26	243.767		2024-05-21	16:41:49	2024-05-21 16:41:49	0.678
2024-03-26 19:34:45	209.205		2024-03-26 19:20:19	109.943		2024-05-21	17:33:56	2024-05-21 17:33:56	244.749		2024-05-21	16:42:19	2024-05-21 16:42:19	0.693
2024-03-26 19:35:15	209.56		2024-03-26 19:20:49	108.268		2024-05-21	17:34:26	2024-05-21 17:34:26	244.212		2024-05-21	16:42:49	2024-05-21 16:42:49	0.673
2024-03-26 19:35:45	209.308		2024-03-26 19:21:19	107.588		2024-05-21	17:34:56	2024-05-21 17:34:56	244.242		2024-05-21	16:43:19	2024-05-21 16:43:19	0.702
2024-03-26 19:36:15	209.308		2024-03-26 19:21:49	107.446		2024-05-21	17:35:26	2024-05-21 17:35:26	243.577		2024-05-21	16:43:49	2024-05-21 16:43:49	0.716
2024-03-26 19:36:45	212.068		2024-03-26 19:22:19	104.588		2024-05-21	17:35:56	2024-05-21 17:35:56	245.881		2024-05-21	16:44:19	2024-05-21 16:44:19	0.705
2024-03-26 19:37:15	213		2024-03-26 19:22:49	101.807		2024-05-21	17:36:26	2024-05-21 17:36:26	245.966		2024-05-21	16:44:49	2024-05-21 16:44:49	0.68
2024-03-26 19:37:45	213.796		2024-03-26 19:23:19	100.632		2024-05-21	17:36:56	2024-05-21 17:36:56	245.272		2024-05-21	16:45:19	2024-05-21 16:45:19	0.668
2024-03-26 19:38:15	212.046		2024-03-26 19:23:49	98.918		2024-05-21	17:37:26	2024-05-21 17:37:26	245.065		2024-05-21	16:45:49	2024-05-21 16:45:49	0.661
2024-03-26 19:38:45	210.615		2024-03-26 19:24:19	97.484		2024-05-21	17:37:56	2024-05-21 17:37:56	245.64		2024-05-21	16:46:19	2024-05-21 16:46:19	0.643
2024-03-26 19:39:15	210.633		2024-03-26 19:24:49	94.627		2024-05-21	17:38:26	2024-05-21 17:38:26	245.061		2024-05-21	16:46:49	2024-05-21 16:46:49	0.67
2024-03-26 19:39:45	209.495		2024-03-26 19:25:19	91.118		2024-05-21	17:38:56	2024-05-21 17:38:56	242.922		2024-05-21	16:47:19	2024-05-21 16:47:19	0.646
2024-03-26 19:40:15	208.531		2024-03-26 19:25:49	89.971		2024-05-21	17:39:26	2024-05-21 17:39:26	244.356		2024-05-21	16:47:49	2024-05-21 16:47:49	0.649
2024-03-26 19:40:45	210.49		2024-03-26 19:26:19	87.428		2024-05-21	17:39:56	2024-05-21 17:39:56	243.807		2024-05-21	16:48:19	2024-05-21 16:48:19	0.658
2024-03-26 19:41:15	210.352		2024-03-26 19:26:49	84.306		2024-05-21	17:40:26	2024-05-21 17:40:26	241.918		2024-05-21	16:48:49	2024-05-21 16:48:49	0.628
2024-03-26 19:41:45	210.086		2024-03-26 19:27:19	81.958		2024-05-21	17:40:56	2024-05-21 17:40:56	241.664		2024-05-21	16:49:19	2024-05-21 16:49:19	0.645
2024-03-26 19:42:15	210.169		2024-03-26 19:27:49	79.295		2024-05-21	17:41:26	2024-05-21 17:41:26	242.853		2024-05-21	16:49:49	2024-05-21 16:49:49	0.636
2024-03-26 19:42:45	207.084		2024-03-26 19:28:19	76.286		2024-05-21	17:41:56	2024-05-21 17:41:56	244.271		2024-05-21	16:50:19	2024-05-21 16:50:19	0.619
2024-03-26 19:43:15	208.02		2024-03-26 19:28:49	72.807		2024-05-21	17:42:26	2024-05-21 17:42:26	243.26		2024-05-21	16:50:49	2024-05-21 16:50:49	0.638
2024-03-26 19:43:45	207.672		2024-03-26 19:29:19	75.248		2024-05-21	17:42:56	2024-05-21 17:42:56	243.241		2024-05-21	16:51:19	2024-05-21 16:51:19	0.643
2024-03-26 19:44:15	208.408		2024-03-26 19:29:49	74.405		2024-05-21	17:43:26	2024-05-21 17:43:26	243.49		2024-05-21	16:51:49	2024-05-21 16:51:49	0.641
2024-03-26 19:44:45	208.957		2024-03-26 19:30:19	73.718		2024-05-21	17:43:56	2024-05-21 17:43:56	242.512		2024-05-21	16:52:19	2024-05-21 16:52:19	0.641
2024-03-26 19:45:15	210.029		2024-03-26 19:30:49	72.271		2024-05-21	17:44:26	2024-05-21 17:44:26	240.517		2024-05-21	16:52:49	2024-05-21 16:52:49	0.636
2024-03-26 19:45:45	210.02		2024-03-26 19:31:19	70.378		2024-05-21	17:44:56	2024-05-21 17:44:56	243.356		2024-05-21	16:53:19	2024-05-21 16:53:19	0.621
2024-03-26 19:46:15	209.627		2024-03-26 19:31:49	69.999		2024-05-21	17:45:26	2024-05-21 17:45:26	244.712		2024-05-21	16:53:49	2024-05-21 16:53:49	0.613
2024-03-26 19:46:45	212.128		2024-03-26 19:32:19	70.764		2024-05-21	17:45:56	2024-05-21 17:45:56	244.398		2024-05-21	16:54:19	2024-05-21 16:54:19	0.606
2024-03-26 19:47:15	207.47		2024-03-26 19:32:49	71.29		2024-05-21	17:46:26	2024-05-21 17:46:26	237.583		2024-05-21	16:54:49	2024-05-21 16:54:49	0.618
2024-03-26 19:47:45	210.776		2024-03-26 19:33:19	71.588		2024-05-21	17:46:56	2024-05-21 17:46:56	239.95		2024-05-21	16:55:19	2024-05-21 16:55:19	0.596
2024-03-26 19:48:15	210.572		2024-03-26 19:33:49	71.992		2024-05-21	17:47:26	2024-05-21 17:47:26	241.758		2024-05-21	16:55:49	2024-05-21 16:55:49	0.623
2024-03-26 19:48:45	210.774		2024-03-26 19:34:19	70.601		2024-05-21	17:47:56	2024-05-21 17:47:56	242.544		2024-05-21	16:56:19	2024-05-21 16:56:19	0.601
2024-03-26 19:49:15	211.351		2024-03-26 19:34:49	68.877		2024-05-21	17:48:26	2024-05-21 17:48:26	242.053		2024-05-21	16:56:49	2024-05-21 16:56:49	0.632
2024-03-26 19:49:45	209.902		2024-03-26 19:35:19	67.019		2024-05-21	17:48:56	2024-05-21 17:48:56	242.263		2024-05-21	16:57:19	2024-05-21 16:57:19	0.661
2024-03-26 19:50:15	206.404		2024-03-26 19:35:49	65.743		2024-05-21	17:49:26	2024-05-21 17:49:26	241.886		2024-05-21	16:57:49	2024-05-21 16:57:49	0.663
2024-03-26 19:50:45	208.521		2024-03-26 19:36:19	64.92		2024-05-21	17:49:56	2024-05-21 17:49:56	241.716		2024-05-21	16:58:19	2024-05-21 16:58:19	0.64
2024-03-26 19:51:15	210.334		2024-03-26 19:36:49	68.546		2024-05-21	17:50:26	2024-05-21 17:50:26	241.808		2024-05-21	16:58:49	2024-05-21 16:58:49	0.633
2024-03-26 19:51:45	210.156		2024-03-26 19:37:19	73.069		2024-05-21	17:50:56	2024-05-21 17:50:56	242.781		2024-05-21	16:59:19	2024-05-21 16:59:19	0.626
2024-03-26 19:52:15	206.962		2024-03-26 19:37:49	85.314		2024-05-21	17:51:26	2024-05-21 17:51:26	242.528		2024-05-21	16:59:49	2024-05-21 16:59:49	0.591
2024-03-26 19:52:45	207.738		2024-03-26 19:38:19	91.78		2024-05-21	17:51:56	2024-05-21 17:51:56	237.716		2024-05-21	17:00:19	2024-05-21 17:00:19	0.63
2024-03-26 19:53:15	208.604		2024-03-26 19:38:49	91.708		2024-05-21	17:52:26	2024-05-21 17:52:26	240.03		2024-05-21	17:00:49	2024-05-21 17:00:49	0.608
2024-03-26 19:53:45	209.355		2024-03-26 19:39:19	88.288		2024-05-21	17:52:56	2024-05-21 17:52:56	240.291		2024-05-21	17:01:19	2024-05-21 17:01:19	0.602
2024-03-26 19:54:15	210.493		2024-03-26 19:39:49	88.678		2024-05-21	17:53:26	2024-05-21 17:53:26	240.081		2024-05-21	17:01:49	2024-05-21 17:01:49	0.629
2024-03-26 19:54:45	211.144		2024-03-26 19:40:19	88.444		2024-05-21	17:53:56	2024-05-21 17:53:56	241.516		2024-05-21	17:02:19	2024-05-21 17:02:19	0.599
2024-03-26 19:55:15	205.652		2024-03-26 19:40:49	88.544		2024-05-21	17:54:26	2024-05-21 17:54:26	242.237		2024-05-21	17:02:49	2024-05-21 17:02:49	0.601
2024-03-26 19:55:45	208.608		2024-03-26 19:41:19	89.99		2024-05-21	17:54:56	2024-05-21 17:54:56	243.222		2024-05-21	17:03:19	2024-05-21 17:03:19	0.594
2024-03-26 19:56:15	210.371		2024-03-26 19:41:49	91.215		2024-05-21	17:55:26	2024-05-21 17:55:26	243.201		2024-05-21	17:03:49	2024-05-21 17:03:49	0.624
2024-03-26 19:56:45	210.833		2024-03-26 19:42:19	90.473		2024-05-21	17:55:56	2024-05-21 17:55:56	243.1		2024-05-21	17:04:19	2024-05-21 17:04:19	0.581
2024-03-26 19:57:15	209.58		2024-03-26 19:42:49	90.165		2024-05-21	17:56:26	2024-05-21 17:56:26	243.029		2024-05-21	17:04:49	2024-05-21 17:04:49	0.629
2024-03-26 19:57:45	209.601		2024-03-26 19:43:19	96.531		2024-05-21	17:56:56	2024-05-21 17:56:56	242.44		2024-05-21	17:05:19	2024-05-21 17:05:19	0.606
2024-03-26 19:58:15	209.034		2024-03-26 19:43:49	108.609		2024-05-21	17:57:26	2024-05-21 17:57:26	243.207		2024-05-21	17:05:49	2024-05-21 17:05:49	0.601
2024-03-26 19:58:45	206.555		2024-03-26 19:44:19	113.782		2024-05-21	17:57:56	2024-05-21 17:57:56	242.97		2024-05-21	17:06:19	2024-05-21 17:06:19	0.591
2024-03-26 19:59:15	207.835		2024-03-26 19:44:49	123.669		2024-05-21	17:58:26	2024-05-21 17:58:26	241.893		2024-05-21	17:06:49	2024-05-21 17:06:49	0.61
2024-03-26 19:59:45	209.24		2024-03-26 19:45:19	123.53		2024-05-21	17:58:56	2024-05-21 17:58:56	242.408		2024-05-21	17:07:19	2024-05-21 17:07:19	0.622
2024-03-26 20:00:15	209.13		2024-03-26 19:45:49	127.126		2024-05-21	17:59:26	2024-05-21 17:59:26	241.774		2024-05-21	17:07:49	2024-05-21 17:07:49	0.617
2024-03-26 20:00:45	208.553		2024-03-26 19:46:19	136.974		2024-05-21	17:59:56	2024-05-21 17:59:56	242.214		2024-05-21	17:08:19	2024-05-21 17:08:19	0.621
2024-03-26 20:01:15	208.846		2024-03-26 19:46:49	134.835		2024-05-21	18:00:26	2024-05-21 18:00:26	242.715		2024-05-21	17:08:49	2024-05-21 17:08:49	0.623
2024-03-26 20:01:45	207.774		2024-03-26 19:47:19	134.269		2024-05-21	18:00:56	2024-05-21 18:00:56	242.65		2024-05-21	17:09:19	2024-05-21 17:09:19	0.632
2024-03-26 20:02:15	207.177		2024-03-26 19:47:49	137.317		2024-05-21	18:01:26	2024-05-21 18:01:26	241.652		2024-05-21	17:09:49	2024-05-21 17:09:49	0.628
2024-03-26 20:02:45	207.528		2024-03-26 19:48:19	139.114		2024-05-21	18:01:56	2024-05-21 18:01:56	241.839		2024-05-21	17:10:19	2024-05-21 17:10:19	0.643
2024-03-26 20:03:15	208.273		2024-03-26 19:48:49	138.437		2024-05-21	18:02:26	2024-05-21 18:02:26	242.409		2024-05-21	17:10:49	2024-05-21 17:10:49	0.606
2024-03-26 20:03:45	208.448		2024-03-26 19:49:19	137.297		2024-05-21	18:02:56	2024-05-21 18:02:56	243.063		2024-05-21	17:11:19	2024-05-21 17:11:19	0.611
2024-03-26 20:04:15	207.701		2024-03-26 19:49:49	136.794		2024-05-21	18:03:26	2024-05-21 18:03:26	242.148		2024-05-21	17:11:49	2024-05-21 17:11:49	0.628
2024-03-26 20:04:45	207.1		2024-03-26 19:50:19	137.761		2024-05-21	18:03:56	2024-05-21 18:03:56	242.464		2024-05-21	17:12:19	2024-05-21 17:12:19	0.611
2024-03-26 20:05:15	208.102		2024-03-26 19:50:49	133.382		2024-05-21	18:04:26	2024-05-21 18:04:26	242.392		2024-05-21	17:12:49	2024-05-21 17:12:49	0.635
2024-03-26 20:05:45	207.822		2024-03-26 19:51:19	131.368		2024-05-21	18:04:56	2024-05-21 18:04:56	241.836		2024-05-21	17:13:19	2024-05-21 17:13:19	0.598
2024-03-26 20:06:15	209.629		2024-03-26 19:51:49	133.069		2024-05-21	18:05:26	2024-05-21 18:05:26	241.966		2024-05-21	17:13:49	2024-05-21 17:13:49	0.615
2024-03-26 20:06:45	210.18		2024-03-26 19:52:19	128.579		2024-05-21	18:05:56	2024-05-21 18:05:56	241.649		2024-05-21	17:14:19	2024-05-21 17:14:19	0.62
2024-03-26 20:07:15	210.175		2024-03-26 19:52:49	124.011		2024-05-21	18:06:26	2024-05-21 18:06:26	242.566		2024-05-21	17:14:49	2024-05-21 17:14:49	0.6
2024-03-26 20:07:45	210.665		2024-03-26 19:53:19	129.086		2024-05-21	18:06:56	2024-05-21 18:06:56	242.425		2024-05-21	17:15:19	2024-05-21 17:15:19	0.62
2024-03-26 20:08:15	210.436		2024-03-26 19:53:49	129.903		2024-05-21	18:07:26	2024-05-21 18:07:26	242.349		2024-05-21	17:15:49	2024-05-21 17:15:49	0.603
2024-03-26 20:08:45	209.878		2024-03-26 19:54:19	125.58		2024-05-21	18:07:56	2024-05-21 18:07:56	242.583		2024-05-21	17:16:19	2024-05-21 17:16:19	0.626
2024-03-26 20:09:15	209.45		2024-03-26 19:54:49	122.781		2024-05-21	18:08:26	2024-05-21 18:08:26	241.678		2024-05-21	17:16:49	2024-05-21 17:16:49	0.638
2024-03-26 20:09:45	209.982		2024-03-26 19:55:19	120.162		2024-05-21	18:08:56	2024-05-21 18:08:56	241.238		2024-05-21	17:17:19	2024-05-21 17:17:19	0.62
2024-03-26 20:10:15	209.666		2024-03-26 19:55:49	119.305		2024-05-21	18:09:26	2024-05-21 18:09:26	241.662		2024-05-21	17:17:49	2024-05-21 17:17:49	0.645
2024-03-26 20:10:45	206.967		2024-03-26 19:56:19	118.641		2024-05-21	18:09:56	2024-05-21 18:09:56	242.5		2024-05-21	17:18:19	2024-05-21 17:18:19	0.615
2024-03-26 20:11:15	210.259		2024-03-26 19:56:49	118.682		2024-05-21	18:10:26	2024-05-21 18:10:26	242.445		2024-05-21	17:18:49	2024-05-21 17:18:49	0.633
2024-03-26 20:11:45	210.754		2024-03-26 19:57:19	116.523		2024-05-21	18:10:56	2024-05-21 18:10:56	240.861		2024-05-21	17:19:19	2024-05-21 17:19:19	0.633
2024-03-26 20:12:15	210.109		2024-03-26 19:57:49	111.906		2024-05-21	18:11:26	2024-05-21 18:11:26	241.268		2024-05-21	17:19:49	2024-05-21 17:19:49	0.619
2024-03-26 20:12:45	206.721		2024-03-26 19:58:19	105.756		2024-05-21	18:11:56	2024-05-21 18:11:56	239.818		2024-05-21	17:20:19	2024-05-21 17:20:19	0.628
2024-03-26 20:13:15	205.995		2024-03-26 19:58:49	98.765		2024-05-21	18:12:26	2024-05-21 18:12:26	240.634		2024-05-21	17:20:49	2024-05-21 17:20:49	0.623
2024-03-26 20:13:45	207.178		2024-03-26 19:59:19	92.977		2024-05-21	18:12:56	2024-05-21 18:12:56	240.894		2024-05-21	17:21:19	2024-05-21 17:21:19	0.623
2024-03-26 20:14:15	209.237		2024-03-26 19:59:49	95.359		2024-05-21	18:13:26	2024-05-21 18:13:26	241.748		2024-05-21	17:21:49	2024-05-21 17:21:49	0.638
2024-03-26 20:14:45	209.927		2024-03-26 20:00:19	107.605		2024-05-21	18:13:56	2024-05-21 18:13:56	240.186		2024-05-21	17:22:19	2024-05-21 17:22:19	0.611
2024-03-26 20:15:15	207.759		2024-03-26 20:00:49	119.52		2024-05-21	18:14:26	2024-05-21 18:14:26	240.803		2024-05-21	17:22:49	2024-05-21 17:22:49	0.608
2024-03-26 20:15:45	208.336		2024-03-26 20:01:19	124.811		2024-05-21	18:14:56	2024-05-21 18:14:56	241.541		2024-05-21	17:23:19	2024-05-21 17:23:19	0.638
2024-03-26 20:16:15	207.748		2024-03-26 20:01:49	125.512		2024-05-21	18:15:26	2024-05-21 18:15:26	241.061		2024-05-21	17:23:49	2024-05-21 17:23:49	0.645
2024-03-26 20:16:45	210.602		2024-03-26 20:02:19	128.045		2024-05-21	18:15:56	2024-05-21 18:15:56	241.816		2024-05-21	17:24:19	2024-05-21 17:24:19	0.63
2024-03-26 20:17:15	209.969		2024-03-26 20:02:49	133.448		2024-05-21	18:16:26	2024-05-21 18:16:26	241.53		2024-05-21	17:24:49	2024-05-21 17:24:49	0.616
2024-03-26 20:17:45	209.286		2024-03-26 20:03:19	139.643		2024-05-21	18:16:56	2024-05-21 18:16:56	241.74		2024-05-21	17:25:19	2024-05-21 17:25:19	0.611
2024-03-26 20:18:15	209.24		2024-03-26 20:03:49	143.595		2024-05-21	18:17:26	2024-05-21 18:17:26	241.58		2024-05-21	17:25:49	2024-05-21 17:25:49	0.63
2024-03-26 20:18:45	208.608		2024-03-26 20:04:19	147.392		2024-05-21	18:17:56	2024-05-21 18:17:56	241.083		2024-05-21	17:26:19	2024-05-21 17:26:19	0.64
2024-03-26 20:19:15	207.849		2024-03-26 20:04:49	151.602		2024-05-21	18:18:26	2024-05-21 18:18:26	240.649		2024-05-21	17:26:49	2024-05-21 17:26:49	0.618
2024-03-26 20:19:45	208.213		2024-03-26 20:05:19	154.288		2024-05-21	18:18:56	2024-05-21 18:18:56	241.022		2024-05-21	17:27:19	2024-05-21 17:27:19	0.63
2024-03-26 20:20:15	209.425		2024-03-26 20:05:49	154.317		2024-05-21	18:19:26	2024-05-21 18:19:26	239.502		2024-05-21	17:27:49	2024-05-21 17:27:49	0.635
2024-03-26 20:20:45	208.769		2024-03-26 20:06:19	156.499		2024-05-21	18:19:56	2024-05-21 18:19:56	238.91		2024-05-21	17:28:19	2024-05-21 17:28:19	0.627
2024-03-26 20:21:15	209.17		2024-03-26 20:06:49	154.884		2024-05-21	18:20:26	2024-05-21 18:20:26	237.273		2024-05-21	17:28:49	2024-05-21 17:28:49	0.642
2024-03-26 20:21:45	207.902		2024-03-26 20:07:19	151.011		2024-05-21	18:20:56	2024-05-21 18:20:56	238.49		2024-05-21	17:29:19	2024-05-21 17:29:19	0.617
2024-03-26 20:22:15	207.247		2024-03-26 20:07:49	145.906		2024-05-21	18:21:26	2024-05-21 18:21:26	237.091		2024-05-21	17:29:49	2024-05-21 17:29:49	0.627
2024-03-26 20:22:45	208.111		2024-03-26 20:08:19	140.434		2024-05-21	18:21:56	2024-05-21 18:21:56	237.21		2024-05-21	17:30:19	2024-05-21 17:30:19	0.637
2024-03-26 20:23:15	208.072		2024-03-26 20:08:49	133.983		2024-05-21	18:22:26	2024-05-21 18:22:26	238.243		2024-05-21	17:30:49	2024-05-21 17:30:49	0.651
2024-03-26 20:23:45	207.617		2024-03-26 20:09:19	127.774		2024-05-21	18:22:56	2024-05-21 18:22:56	237.917		2024-05-21	17:31:19	2024-05-21 17:31:19	0.622
2024-03-26 20:24:15	208.077		2024-03-26 20:09:49	122.473		2024-05-21	18:23:26	2024-05-21 18:23:26	238.18		2024-05-21	17:31:49	2024-05-21 17:31:49	0.639
2024-03-26 20:24:45	208.061		2024-03-26 20:10:19	119.498		2024-05-21	18:23:56	2024-05-21 18:23:56	237.527		2024-05-21	17:32:19	2024-05-21 17:32:19	0.624
2024-03-26 20:25:15	208.015		2024-03-26 20:10:49	115.345		2024-05-21	18:24:26	2024-05-21 18:24:26	238.544		2024-05-21	17:32:49	2024-05-21 17:32:49	0.625
2024-03-26 20:25:45	208.456		2024-03-26 20:11:19	111.224		2024-05-21	18:24:56	2024-05-21 18:24:56	236.757		2024-05-21	17:33:19	2024-05-21 17:33:19	0.629
2024-03-26 20:26:15	208.394		2024-03-26 20:11:49	108.448		2024-05-21	18:25:26	2024-05-21 18:25:26	237.805		2024-05-21	17:33:49	2024-05-21 17:33:49	0.629
2024-03-26 20:26:45	209.012		2024-03-26 20:12:19	105.074		2024-05-21	18:25:56	2024-05-21 18:25:56	233.489		2024-05-21	17:34:19	2024-05-21 17:34:19	0.62
2024-03-26 20:27:15	208.513		2024-03-26 20:12:49	99.468		2024-05-21	18:26:26	2024-05-21 18:26:26	235.178		2024-05-21	17:34:49	2024-05-21 17:34:49	0.634
2024-03-26 20:27:45	206.726		2024-03-26 20:13:19	94.053		2024-05-21	18:26:56	2024-05-21 18:26:56	233.807		2024-05-21	17:35:19	2024-05-21 17:35:19	0.639
2024-03-26 20:28:15	207.106		2024-03-26 20:13:49	93.626		2024-05-21	18:27:26	2024-05-21 18:27:26	235.77		2024-05-21	17:35:49	2024-05-21 17:35:49	0.634
2024-03-26 20:28:45	206.232		2024-03-26 20:14:19	95.336		2024-05-21	18:27:56	2024-05-21 18:27:56	234.306		2024-05-21	17:36:19	2024-05-21 17:36:19	0.661
2024-03-26 20:29:15	208.492		2024-03-26 20:14:49	100.456		2024-05-21	18:28:26	2024-05-21 18:28:26	234.895		2024-05-21	17:36:49	2024-05-21 17:36:49	0.641
2024-03-26 20:29:45	206.611		2024-03-26 20:15:19	104.141		2024-05-21	18:28:56	2024-05-21 18:28:56	234.151		2024-05-21	17:37:19	2024-05-21 17:37:19	0.619
2024-03-26 20:30:15	207.063		2024-03-26 20:15:49	104.861		2024-05-21	18:29:26	2024-05-21 18:29:26	233.157		2024-05-21	17:37:49	2024-05-21 17:37:49	0.637
2024-03-26 20:30:45	208.517		2024-03-26 20:16:19	104.872		2024-05-21	18:29:56	2024-05-21 18:29:56	233.552		2024-05-21	17:38:19	2024-05-21 17:38:19	0.634
2024-03-26 20:31:15	207.671		2024-03-26 20:16:49	107.336		2024-05-21	18:30:26	2024-05-21 18:30:26	231.032		2024-05-21	17:38:49	2024-05-21 17:38:49	0.637
2024-03-26 20:31:45	207.39		2024-03-26 20:17:19	111.941		2024-05-21	18:30:56	2024-05-21 18:30:56	232.807		2024-05-21	17:39:19	2024-05-21 17:39:19	0.634
2024-03-26 20:32:15	209.036		2024-03-26 20:17:49	116.873		2024-05-21	18:31:26	2024-05-21 18:31:26	232.353		2024-05-21	17:39:49	2024-05-21 17:39:49	0.627
2024-03-26 20:32:45	209.445		2024-03-26 20:18:19	121.899		2024-05-21	18:31:56	2024-05-21 18:31:56	232.03		2024-05-21	17:40:19	2024-05-21 17:40:19	0.642
2024-03-26 20:33:15	208.213		2024-03-26 20:18:49	122.909		2024-05-21	18:32:26	2024-05-21 18:32:26	231.727		2024-05-21	17:40:49	2024-05-21 17:40:49	0.627
2024-03-26 20:33:45	206.88		2024-03-26 20:19:19	120.253		2024-05-21	18:32:56	2024-05-21 18:32:56	222.313		2024-05-21	17:41:19	2024-05-21 17:41:19	0.639
2024-03-26 20:34:15	206.697		2024-03-26 20:19:49	114.414		2024-05-21	18:33:26	2024-05-21 18:33:26	226.273		2024-05-21	17:41:49	2024-05-21 17:41:49	0.632
2024-03-26 20:34:45	206.717		2024-03-26 20:20:19	112.198		2024-05-21	18:33:56	2024-05-21 18:33:56	226.063		2024-05-21	17:42:19	2024-05-21 17:42:19	0.629
2024-03-26 20:35:15	204.954		2024-03-26 20:20:49	111.959		2024-05-21	18:34:26	2024-05-21 18:34:26	234.091		2024-05-21	17:42:49	2024-05-21 17:42:49	0.618
2024-03-26 20:35:45	200.712		2024-03-26 20:21:19	117.993		2024-05-21	18:34:56	2024-05-21 18:34:56	234.557		2024-05-21	17:43:19	2024-05-21 17:43:19	0.642
2024-03-26 20:36:15	197.145		2024-03-26 20:21:49	122.545		2024-05-21	18:35:26	2024-05-21 18:35:26	233.685		2024-05-21	17:43:49	2024-05-21 17:43:49	0.653
2024-03-26 20:36:45	200.619		2024-03-26 20:22:19	127.882		2024-05-21	18:35:56	2024-05-21 18:35:56	226.297		2024-05-21	17:44:19	2024-05-21 17:44:19	0.619
2024-03-26 20:37:15	198.637		2024-03-26 20:22:49	131.512		2024-05-21	18:36:26	2024-05-21 18:36:26	232.091		2024-05-21	17:44:49	2024-05-21 17:44:49	0.619
2024-03-26 20:37:45	195.593		2024-03-26 20:23:19	134.507		2024-05-21	18:36:56	2024-05-21 18:36:56	234.304		2024-05-21	17:45:19	2024-05-21 17:45:19	0.634
2024-03-26 20:38:15	196.756		2024-03-26 20:23:49	137.105		2024-05-21	18:37:26	2024-05-21 18:37:26	234.373		2024-05-21	17:45:49	2024-05-21 17:45:49	0.651
2024-03-26 20:38:45	197.724		2024-03-26 20:24:19	138.549		2024-05-21	18:37:56	2024-05-21 18:37:56	234.034		2024-05-21	17:46:19	2024-05-21 17:46:19	0.639
2024-03-26 20:39:15	200.436		2024-03-26 20:24:49	140.617		2024-05-21	18:38:26	2024-05-21 18:38:26	232.668		2024-05-21	17:46:49	2024-05-21 17:46:49	0.649
2024-03-26 20:39:45	200.593		2024-03-26 20:25:19	142.364		2024-05-21	18:38:56	2024-05-21 18:38:56	232.444		2024-05-21	17:47:19	2024-05-21 17:47:19	0.624
2024-03-26 20:40:15	198.658		2024-03-26 20:25:49	142.755		2024-05-21	18:39:26	2024-05-21 18:39:26	233.235		2024-05-21	17:47:49	2024-05-21 17:47:49	0.651
2024-03-26 20:40:45	200.375		2024-03-26 20:26:19	141.516		2024-05-21	18:39:56	2024-05-21 18:39:56	234.109		2024-05-21	17:48:19	2024-05-21 17:48:19	0.661
2024-03-26 20:41:15	201.046		2024-03-26 20:26:49	140.328		2024-05-21	18:40:26	2024-05-21 18:40:26	234.062		2024-05-21	17:48:49	2024-05-21 17:48:49	0.656
2024-03-26 20:41:45	201.7		2024-03-26 20:27:19	139.228		2024-05-21	18:40:56	2024-05-21 18:40:56	233.62		2024-05-21	17:49:19	2024-05-21 17:49:19	0.632
2024-03-26 20:42:15	203.027		2024-03-26 20:27:49	137.819		2024-05-21	18:41:26	2024-05-21 18:41:26	232.921		2024-05-21	17:49:49	2024-05-21 17:49:49	0.644
2024-03-26 20:42:45	202.073		2024-03-26 20:28:19	135.138		2024-05-21	18:41:56	2024-05-21 18:41:56	233.709		2024-05-21	17:50:19	2024-05-21 17:50:19	0.627
2024-03-26 20:43:15	200.915		2024-03-26 20:28:49	130.502		2024-05-21	18:42:26	2024-05-21 18:42:26	233.178		2024-05-21	17:50:49	2024-05-21 17:50:49	0.646
2024-03-26 20:43:45	201.343		2024-03-26 20:29:19	123.963		2024-05-21	18:42:56	2024-05-21 18:42:56	233.806		2024-05-21	17:51:19	2024-05-21 17:51:19	0.641
2024-03-26 20:44:15	202.152		2024-03-26 20:29:49	120.617		2024-05-21	18:43:26	2024-05-21 18:43:26	232.88		2024-05-21	17:51:49	2024-05-21 17:51:49	0.648
2024-03-26 20:44:45	203.798		2024-03-26 20:30:19	117.946		2024-05-21	18:43:56	2024-05-21 18:43:56	231.305		2024-05-21	17:52:19	2024-05-21 17:52:19	0.651
2024-03-26 20:45:15	203.109		2024-03-26 20:30:49	115.586		2024-05-21	18:44:26	2024-05-21 18:44:26	231.367		2024-05-21	17:52:49	2024-05-21 17:52:49	0.619
2024-03-26 20:45:45	201.79		2024-03-26 20:31:19	112.699		2024-05-21	18:44:56	2024-05-21 18:44:56	232.438		2024-05-21	17:53:19	2024-05-21 17:53:19	0.633
2024-03-26 20:46:15	202.987		2024-03-26 20:31:49	109.107		2024-05-21	18:45:26	2024-05-21 18:45:26	232.862		2024-05-21	17:53:49	2024-05-21 17:53:49	0.64
2024-03-26 20:46:45	202.793		2024-03-26 20:32:19	107.224		2024-05-21	18:45:56	2024-05-21 18:45:56	227.912		2024-05-21	17:54:19	2024-05-21 17:54:19	0.633
2024-03-26 20:47:15	202.535		2024-03-26 20:32:49	107.041		2024-05-21	18:46:26	2024-05-21 18:46:26	227.911		2024-05-21	17:54:49	2024-05-21 17:54:49	0.631
2024-03-26 20:47:45	202.667		2024-03-26 20:33:19	108.626		2024-05-21	18:46:56	2024-05-21 18:46:56	230.866		2024-05-21	17:55:19	2024-05-21 17:55:19	0.633
2024-03-26 20:48:15	202.515		2024-03-26 20:33:49	109.443		2024-05-21	18:47:26	2024-05-21 18:47:26	229.962		2024-05-21	17:55:49	2024-05-21 17:55:49	0.642
2024-03-26 20:48:45	202.658		2024-03-26 20:34:19	108.965		2024-05-21	18:47:56	2024-05-21 18:47:56	231.137		2024-05-21	17:56:19	2024-05-21 17:56:19	0.652
2024-03-26 20:49:15	202.337		2024-03-26 20:34:49	89.274		2024-05-21	18:48:26	2024-05-21 18:48:26	231.159		2024-05-21	17:56:49	2024-05-21 17:56:49	0.635
2024-03-26 20:49:45	200.377		2024-03-26 20:35:19	111.198		2024-05-21	18:48:56	2024-05-21 18:48:56	231.921		2024-05-21	17:57:19	2024-05-21 17:57:19	0.645
2024-03-26 20:50:15	200.049		2024-03-26 20:35:49	128.734		2024-05-21	18:49:26	2024-05-21 18:49:26	230.915		2024-05-21	17:57:49	2024-05-21 17:57:49	0.652
2024-03-26 20:50:45	200.052		2024-03-26 20:36:19	126.078		2024-05-21	18:49:56	2024-05-21 18:49:56	230.676		2024-05-21	17:58:19	2024-05-21 17:58:19	0.657
2024-03-26 20:51:15	201.952		2024-03-26 20:36:49	126.541		2024-05-21	18:50:26	2024-05-21 18:50:26	232.116		2024-05-21	17:58:49	2024-05-21 17:58:49	0.642
2024-03-26 20:51:45	200.434		2024-03-26 20:37:19	122.169		2024-05-21	18:50:56	2024-05-21 18:50:56	231.764		2024-05-21	17:59:19	2024-05-21 17:59:19	0.647
2024-03-26 20:52:15	199.807		2024-03-26 20:37:49	110.33		2024-05-21	18:51:26	2024-05-21 18:51:26	231.693		2024-05-21	17:59:49	2024-05-21 17:59:49	0.647
2024-03-26 20:52:45	200.732		2024-03-26 20:38:19	104.494		2024-05-21	18:51:56	2024-05-21 18:51:56	232.238		2024-05-21	18:00:19	2024-05-21 18:00:19	0.63
2024-03-26 20:53:15	200.134		2024-03-26 20:38:49	108.962		2024-05-21	18:52:26	2024-05-21 18:52:26	232.721		2024-05-21	18:00:49	2024-05-21 18:00:49	0.647
2024-03-26 20:53:45	199.491		2024-03-26 20:39:19	112.289		2024-05-21	18:52:56	2024-05-21 18:52:56	232.732		2024-05-21	18:01:19	2024-05-21 18:01:19	0.647
2024-03-26 20:54:15	199.551		2024-03-26 20:39:49	118.57		2024-05-21	18:53:26	2024-05-21 18:53:26	231.336		2024-05-21	18:01:49	2024-05-21 18:01:49	0.635
2024-03-26 20:54:45	199.543		2024-03-26 20:40:19	125.277		2024-05-21	18:53:56	2024-05-21 18:53:56	231.711		2024-05-21	18:02:19	2024-05-21 18:02:19	0.662
2024-03-26 20:55:15	199.275		2024-03-26 20:40:49	126.826		2024-05-21	18:54:26	2024-05-21 18:54:26	231.667		2024-05-21	18:02:49	2024-05-21 18:02:49	0.64
2024-03-26 20:55:45	198.388		2024-03-26 20:41:19	123.687		2024-05-21	18:54:56	2024-05-21 18:54:56	231.581		2024-05-21	18:03:19	2024-05-21 18:03:19	0.652
2024-03-26 20:56:15	197.433		2024-03-26 20:41:49	121.49		2024-05-21	18:55:26	2024-05-21 18:55:26	231.354		2024-05-21	18:03:49	2024-05-21 18:03:49	0.645
2024-03-26 20:56:45	198.74		2024-03-26 20:42:19	126.003		2024-05-21	18:55:56	2024-05-21 18:55:56	232.538		2024-05-21	18:04:19	2024-05-21 18:04:19	0.664
2024-03-26 20:57:15	195.813		2024-03-26 20:42:49	130.828		2024-05-21	18:56:26	2024-05-21 18:56:26	233		2024-05-21	18:04:49	2024-05-21 18:04:49	0.657
2024-03-26 20:57:45	197.145		2024-03-26 20:43:19	132.464		2024-05-21	18:56:56	2024-05-21 18:56:56	233.187		2024-05-21	18:05:19	2024-05-21 18:05:19	0.661
2024-03-26 20:58:15	199.186		2024-03-26 20:43:49	131.894		2024-05-21	18:57:26	2024-05-21 18:57:26	231.386		2024-05-21	18:05:49	2024-05-21 18:05:49	0.634
2024-03-26 20:58:45	197.595		2024-03-26 20:44:19	129.054		2024-05-21	18:57:56	2024-05-21 18:57:56	231.424		2024-05-21	18:06:19	2024-05-21 18:06:19	0.654
2024-03-26 20:59:15	199.273		2024-03-26 20:44:49	125.305		2024-05-21	18:58:26	2024-05-21 18:58:26	230.858		2024-05-21	18:06:49	2024-05-21 18:06:49	0.647
2024-03-26 20:59:45	197.533		2024-03-26 20:45:19	122.997		2024-05-21	18:58:56	2024-05-21 18:58:56	230.777		2024-05-21	18:07:19	2024-05-21 18:07:19	0.63
2024-03-26 21:00:15	198.42		2024-03-26 20:45:49	122.088		2024-05-21	18:59:26	2024-05-21 18:59:26	230.581		2024-05-21	18:07:49	2024-05-21 18:07:49	0.64
2024-03-26 21:00:45	197.224		2024-03-26 20:46:19	121.879		2024-05-21	18:59:56	2024-05-21 18:59:56	230.563		2024-05-21	18:08:19	2024-05-21 18:08:19	0.654
2024-03-26 21:01:15	198.635		2024-03-26 20:46:49	121.134		2024-05-21	19:00:26	2024-05-21 19:00:26	231.641		2024-05-21	18:08:49	2024-05-21 18:08:49	0.65
2024-03-26 21:01:45	198.489		2024-03-26 20:47:19	120.657		2024-05-21	19:00:56	2024-05-21 19:00:56	230.592		2024-05-21	18:09:19	2024-05-21 18:09:19	0.63
2024-03-26 21:02:15	199.171		2024-03-26 20:47:49	121.27		2024-05-21	19:01:26	2024-05-21 19:01:26	231.504		2024-05-21	18:09:49	2024-05-21 18:09:49	0.655
2024-03-26 21:02:45	199.352		2024-03-26 20:48:19	122.162		2024-05-21	19:01:56	2024-05-21 19:01:56	231.297		2024-05-21	18:10:19	2024-05-21 18:10:19	0.632
2024-03-26 21:03:15	199.833		2024-03-26 20:48:49	122.106		2024-05-21	19:02:26	2024-05-21 19:02:26	231.592		2024-05-21	18:10:49	2024-05-21 18:10:49	0.645
2024-03-26 21:03:45	199.497		2024-03-26 20:49:19	120.85		2024-05-21	19:02:56	2024-05-21 19:02:56	232.145		2024-05-21	18:11:19	2024-05-21 18:11:19	0.652
2024-03-26 21:04:15	198.693		2024-03-26 20:49:49	118.384		2024-05-21	19:03:26	2024-05-21 19:03:26	232.078		2024-05-21	18:11:49	2024-05-21 18:11:49	0.669
2024-03-26 21:04:45	200.577		2024-03-26 20:50:19	115.65		2024-05-21	19:03:56	2024-05-21 19:03:56	232.089		2024-05-21	18:12:19	2024-05-21 18:12:19	0.649
2024-03-26 21:05:15	199.1		2024-03-26 20:50:49	112.929		2024-05-21	19:04:26	2024-05-21 19:04:26	228.994		2024-05-21	18:12:49	2024-05-21 18:12:49	0.671
2024-03-26 21:05:45	198.837		2024-03-26 20:51:19	110.024		2024-05-21	19:04:56	2024-05-21 19:04:56	228.659		2024-05-21	18:13:19	2024-05-21 18:13:19	0.662
2024-03-26 21:06:15	199.247		2024-03-26 20:51:49	107.539		2024-05-21	19:05:26	2024-05-21 19:05:26	227.258		2024-05-21	18:13:49	2024-05-21 18:13:49	0.652
2024-03-26 21:06:45	200.201		2024-03-26 20:52:19	106.622		2024-05-21	19:05:56	2024-05-21 19:05:56	227.158		2024-05-21	18:14:19	2024-05-21 18:14:19	0.647
2024-03-26 21:07:15	199.599		2024-03-26 20:52:49	107.257		2024-05-21	19:06:26	2024-05-21 19:06:26	228.979		2024-05-21	18:14:49	2024-05-21 18:14:49	0.647
2024-03-26 21:07:45	201.26		2024-03-26 20:53:19	109.002		2024-05-21	19:06:56	2024-05-21 19:06:56	229.722		2024-05-21	18:15:19	2024-05-21 18:15:19	0.63
2024-03-26 21:08:15	201.059		2024-03-26 20:53:49	108.862		2024-05-21	19:07:26	2024-05-21 19:07:26	230.467		2024-05-21	18:15:49	2024-05-21 18:15:49	0.645
2024-03-26 21:08:45	198.964		2024-03-26 20:54:19	107.757		2024-05-21	19:07:56	2024-05-21 19:07:56	230.788		2024-05-21	18:16:19	2024-05-21 18:16:19	0.667
2024-03-26 21:09:15	198.418		2024-03-26 20:54:49	104.852		2024-05-21	19:08:26	2024-05-21 19:08:26	230.712		2024-05-21	18:16:49	2024-05-21 18:16:49	0.64
2024-03-26 21:09:45	198.757		2024-03-26 20:55:19	101.498		2024-05-21	19:08:56	2024-05-21 19:08:56	230.984		2024-05-21	18:17:19	2024-05-21 18:17:19	0.664
2024-03-26 21:10:15	201.149		2024-03-26 20:55:49	98.542		2024-05-21	19:09:26	2024-05-21 19:09:26	230.264		2024-05-21	18:17:49	2024-05-21 18:17:49	0.647
2024-03-26 21:10:45	200.013		2024-03-26 20:56:19	94.828		2024-05-21	19:09:56	2024-05-21 19:09:56	230.383		2024-05-21	18:18:19	2024-05-21 18:18:19	0.669
2024-03-26 21:11:15	201.176		2024-03-26 20:56:49	90.91		2024-05-21	19:10:26	2024-05-21 19:10:26	229.754		2024-05-21	18:18:49	2024-05-21 18:18:49	0.665
2024-03-26 21:11:45	200.124		2024-03-26 20:57:19	86.874		2024-05-21	19:10:56	2024-05-21 19:10:56	229.708		2024-05-21	18:19:19	2024-05-21 18:19:19	0.662
2024-03-26 21:12:15	199.435		2024-03-26 20:57:49	86.35		2024-05-21	19:11:26	2024-05-21 19:11:26	229.165		2024-05-21	18:19:49	2024-05-21 18:19:49	0.662
2024-03-26 21:12:45	200.589		2024-03-26 20:58:19	86.08		2024-05-21	19:11:56	2024-05-21 19:11:56	228.766		2024-05-21	18:20:19	2024-05-21 18:20:19	0.65
2024-03-26 21:13:15	201.477		2024-03-26 20:58:49	86.242		2024-05-21	19:12:26	2024-05-21 19:12:26	226.741		2024-05-21	18:20:49	2024-05-21 18:20:49	0.662
2024-03-26 21:13:45	199.076		2024-03-26 20:59:19	86.454		2024-05-21	19:12:56	2024-05-21 19:12:56	228.285		2024-05-21	18:21:19	2024-05-21 18:21:19	0.652
2024-03-26 21:14:15	199.247		2024-03-26 20:59:49	86.534		2024-05-21	19:13:26	2024-05-21 19:13:26	226.651		2024-05-21	18:21:49	2024-05-21 18:21:49	0.652
2024-03-26 21:14:45	198.418		2024-03-26 21:00:19	87.385		2024-05-21	19:13:56	2024-05-21 19:13:56	228.664		2024-05-21	18:22:19	2024-05-21 18:22:19	0.637
2024-03-26 21:15:15	199.772		2024-03-26 21:00:49	90.351		2024-05-21	19:14:26	2024-05-21 19:14:26	227.818		2024-05-21	18:22:49	2024-05-21 18:22:49	0.662
2024-03-26 21:15:45	199.865		2024-03-26 21:01:19	94.392		2024-05-21	19:14:56	2024-05-21 19:14:56	227.247		2024-05-21	18:23:19	2024-05-21 18:23:19	0.655
2024-03-26 21:16:15	199.29		2024-03-26 21:01:49	96.607		2024-05-21	19:15:26	2024-05-21 19:15:26	228.787		2024-05-21	18:23:49	2024-05-21 18:23:49	0.66
2024-03-26 21:16:45	200.035		2024-03-26 21:02:19	97.823		2024-05-21	19:15:56	2024-05-21 19:15:56	228.406		2024-05-21	18:24:19	2024-05-21 18:24:19	0.65
2024-03-26 21:17:15	200.304		2024-03-26 21:02:49	97.508		2024-05-21	19:16:26	2024-05-21 19:16:26	228.346		2024-05-21	18:24:49	2024-05-21 18:24:49	0.669
2024-03-26 21:17:45	200.927		2024-03-26 21:03:19	96.944		2024-05-21	19:16:56	2024-05-21 19:16:56	229.362		2024-05-21	18:25:19	2024-05-21 18:25:19	0.672
2024-03-26 21:18:15	200.006		2024-03-26 21:03:49	98.709		2024-05-21	19:17:26	2024-05-21 19:17:26	228.085		2024-05-21	18:25:49	2024-05-21 18:25:49	0.658
2024-03-26 21:18:45	199.115		2024-03-26 21:04:19	101.774		2024-05-21	19:17:56	2024-05-21 19:17:56	228.056		2024-05-21	18:26:19	2024-05-21 18:26:19	0.672
2024-03-26 21:19:15	198.216		2024-03-26 21:04:49	104.919		2024-05-21	19:18:26	2024-05-21 19:18:26	229.489		2024-05-21	18:26:49	2024-05-21 18:26:49	0.657
2024-03-26 21:19:45	186.576		2024-03-26 21:05:19	105.113		2024-05-21	19:18:56	2024-05-21 19:18:56	227.964		2024-05-21	18:27:19	2024-05-21 18:27:19	0.665
2024-03-26 21:20:15	199.506		2024-03-26 21:05:49	103.656		2024-05-21	19:19:26	2024-05-21 19:19:26	227.175		2024-05-21	18:27:49	2024-05-21 18:27:49	0.665
2024-03-26 21:20:45	197.961		2024-03-26 21:06:19	99.128		2024-05-21	19:19:56	2024-05-21 19:19:56	228.337		2024-05-21	18:28:19	2024-05-21 18:28:19	0.652
2024-03-26 21:21:15	200.754		2024-03-26 21:06:49	97.365		2024-05-21	19:20:26	2024-05-21 19:20:26	228.484		2024-05-21	18:28:49	2024-05-21 18:28:49	0.67
2024-03-26 21:21:45	200.336		2024-03-26 21:07:19	109.794		2024-05-21	19:20:56	2024-05-21 19:20:56	228.072		2024-05-21	18:29:19	2024-05-21 18:29:19	0.677
2024-03-26 21:22:15	201.628		2024-03-26 21:07:49	110.063		2024-05-21	19:21:26	2024-05-21 19:21:26	228.689		2024-05-21	18:29:49	2024-05-21 18:29:49	0.663
2024-03-26 21:22:45	200.602		2024-03-26 21:08:19	114.608		2024-05-21	19:21:56	2024-05-21 19:21:56	225.694		2024-05-21	18:30:19	2024-05-21 18:30:19	0.67
2024-03-26 21:23:15	199.359		2024-03-26 21:08:49	117.066		2024-05-21	19:22:26	2024-05-21 19:22:26	225.48		2024-05-21	18:30:49	2024-05-21 18:30:49	0.67
2024-03-26 21:23:45	200.467		2024-03-26 21:09:19	118.337		2024-05-21	19:22:56	2024-05-21 19:22:56	227.592		2024-05-21	18:31:19	2024-05-21 18:31:19	0.665
2024-03-26 21:24:15	199.34		2024-03-26 21:09:49	118.86		2024-05-21	19:23:26	2024-05-21 19:23:26	227.439		2024-05-21	18:31:49	2024-05-21 18:31:49	0.663
2024-03-26 21:24:45	200.85		2024-03-26 21:10:19	119.016		2024-05-21	19:23:56	2024-05-21 19:23:56	226.975		2024-05-21	18:32:19	2024-05-21 18:32:19	0.673
2024-03-26 21:25:15	200.846		2024-03-26 21:10:49	118.828		2024-05-21	19:24:26	2024-05-21 19:24:26	226.338		2024-05-21	18:32:49	2024-05-21 18:32:49	0.673
2024-03-26 21:25:45	198.465		2024-03-26 21:11:19	119.926		2024-05-21	19:24:56	2024-05-21 19:24:56	225.813		2024-05-21	18:33:19	2024-05-21 18:33:19	0.666
2024-03-26 21:26:15	197.995		2024-03-26 21:11:49	122.06		2024-05-21	19:25:26	2024-05-21 19:25:26	221.252		2024-05-21	18:33:49	2024-05-21 18:33:49	0.69
2024-03-26 21:26:45	201.112		2024-03-26 21:12:19	123.731		2024-05-21	19:25:56	2024-05-21 19:25:56	221.544		2024-05-21	18:34:19	2024-05-21 18:34:19	0.671
2024-03-26 21:27:15	200.831		2024-03-26 21:12:49	127.096		2024-05-21	19:26:26	2024-05-21 19:26:26	220.293		2024-05-21	18:34:49	2024-05-21 18:34:49	0.683
2024-03-26 21:27:45	198.469		2024-03-26 21:13:19	126.823		2024-05-21	19:26:56	2024-05-21 19:26:56	220.578		2024-05-21	18:35:19	2024-05-21 18:35:19	0.666
2024-03-26 21:28:15	199.536		2024-03-26 21:13:49	135.001		2024-05-21	19:27:26	2024-05-21 19:27:26	221.826		2024-05-21	18:35:49	2024-05-21 18:35:49	0.681
2024-03-26 21:28:45	198.113		2024-03-26 21:14:19	144.572		2024-05-21	19:27:56	2024-05-21 19:27:56	219.402		2024-05-21	18:36:19	2024-05-21 18:36:19	0.681
2024-03-26 21:29:15	196.547		2024-03-26 21:14:49	134.737		2024-05-21	19:28:26	2024-05-21 19:28:26	216.704		2024-05-21	18:36:49	2024-05-21 18:36:49	0.669
2024-03-26 21:29:45	197.544		2024-03-26 21:15:19	130.113		2024-05-21	19:28:56	2024-05-21 19:28:56	217.675		2024-05-21	18:37:19	2024-05-21 18:37:19	0.662
2024-03-26 21:30:15	197.712		2024-03-26 21:15:49	126.712		2024-05-21	19:29:26	2024-05-21 19:29:26	216.647		2024-05-21	18:37:49	2024-05-21 18:37:49	0.691
2024-03-26 21:30:45	198.317		2024-03-26 21:16:19	125.646		2024-05-21	19:29:56	2024-05-21 19:29:56	217.023		2024-05-21	18:38:19	2024-05-21 18:38:19	0.669
2024-03-26 21:31:15	196.123		2024-03-26 21:16:49	132.267		2024-05-21	19:30:26	2024-05-21 19:30:26	218.059		2024-05-21	18:38:49	2024-05-21 18:38:49	0.697
2024-03-26 21:31:45	196.596		2024-03-26 21:17:19	138.308		2024-05-21	19:30:56	2024-05-21 19:30:56	220.149		2024-05-21	18:39:19	2024-05-21 18:39:19	0.681
2024-03-26 21:32:15	197.79		2024-03-26 21:17:49	142.109		2024-05-21	19:31:26	2024-05-21 19:31:26	222.207		2024-05-21	18:39:49	2024-05-21 18:39:49	0.661
2024-03-26 21:32:45	197.747		2024-03-26 21:18:19	145.038		2024-05-21	19:31:56	2024-05-21 19:31:56	218.918		2024-05-21	18:40:19	2024-05-21 18:40:19	0.678
2024-03-26 21:33:15	198.33		2024-03-26 21:18:49	146.231		2024-05-21	19:32:26	2024-05-21 19:32:26	217.611		2024-05-21	18:40:49	2024-05-21 18:40:49	0.688
2024-03-26 21:33:45	196.203		2024-03-26 21:19:19	144.517		2024-05-21	19:32:56	2024-05-21 19:32:56	225.435		2024-05-21	18:41:19	2024-05-21 18:41:19	0.705
2024-03-26 21:34:15	197.963		2024-03-26 21:19:49	142.783		2024-05-21	19:33:26	2024-05-21 19:33:26	223.898		2024-05-21	18:41:49	2024-05-21 18:41:49	0.671
2024-03-26 21:34:45	197.473		2024-03-26 21:20:19	141.295		2024-05-21	19:33:56	2024-05-21 19:33:56	220.638		2024-05-21	18:42:19	2024-05-21 18:42:19	0.681
2024-03-26 21:35:15	197.3		2024-03-26 21:20:49	139.736		2024-05-21	19:34:26	2024-05-21 19:34:26	219.39		2024-05-21	18:42:49	2024-05-21 18:42:49	0.71
2024-03-26 21:35:45	198.287		2024-03-26 21:21:19	139.439		2024-05-21	19:34:56	2024-05-21 19:34:56	220.551		2024-05-21	18:43:19	2024-05-21 18:43:19	0.693
2024-03-26 21:36:15	197.785		2024-03-26 21:21:49	137.77		2024-05-21	19:35:26	2024-05-21 19:35:26	219.515		2024-05-21	18:43:49	2024-05-21 18:43:49	0.69
2024-03-26 21:36:45	197.324		2024-03-26 21:22:19	138.113		2024-05-21	19:35:56	2024-05-21 19:35:56	220.783		2024-05-21	18:44:19	2024-05-21 18:44:19	0.683
2024-03-26 21:37:15	198.079		2024-03-26 21:22:49	137.924		2024-05-21	19:36:26	2024-05-21 19:36:26	224.727		2024-05-21	18:44:49	2024-05-21 18:44:49	0.693
2024-03-26 21:37:45	198.368		2024-03-26 21:23:19	137.06		2024-05-21	19:36:56	2024-05-21 19:36:56	225.129		2024-05-21	18:45:19	2024-05-21 18:45:19	0.672
2024-03-26 21:38:15	198.31		2024-03-26 21:23:49	135.226		2024-05-21	19:37:26	2024-05-21 19:37:26	224.814		2024-05-21	18:45:49	2024-05-21 18:45:49	0.679
2024-03-26 21:38:45	197.779		2024-03-26 21:24:19	137.245		2024-05-21	19:37:56	2024-05-21 19:37:56	224.434		2024-05-21	18:46:19	2024-05-21 18:46:19	0.676
2024-03-26 21:39:15	197.582		2024-03-26 21:24:49	138.66		2024-05-21	19:38:26	2024-05-21 19:38:26	226.105		2024-05-21	18:46:49	2024-05-21 18:46:49	0.662
2024-03-26 21:39:45	197.33		2024-03-26 21:25:19	139.17		2024-05-21	19:38:56	2024-05-21 19:38:56	226.915		2024-05-21	18:47:19	2024-05-21 18:47:19	0.679
2024-03-26 21:40:15	196.292		2024-03-26 21:25:49	139.437		2024-05-21	19:39:26	2024-05-21 19:39:26	226.594		2024-05-21	18:47:49	2024-05-21 18:47:49	0.669
2024-03-26 21:40:45	197.202		2024-03-26 21:26:19	139.644		2024-05-21	19:39:56	2024-05-21 19:39:56	226.382		2024-05-21	18:48:19	2024-05-21 18:48:19	0.698
2024-03-26 21:41:15	197.606		2024-03-26 21:26:49	139.67		2024-05-21	19:40:26	2024-05-21 19:40:26	220.354		2024-05-21	18:48:49	2024-05-21 18:48:49	0.689
2024-03-26 21:41:45	197.03		2024-03-26 21:27:19	140.152		2024-05-21	19:40:56	2024-05-21 19:40:56	220.707		2024-05-21	18:49:19	2024-05-21 18:49:19	0.701
2024-03-26 21:42:15	197.36		2024-03-26 21:27:49	139.386		2024-05-21	19:41:26	2024-05-21 19:41:26	223.898		2024-05-21	18:49:49	2024-05-21 18:49:49	0.684
2024-03-26 21:42:45	196.885		2024-03-26 21:28:19	137.633		2024-05-21	19:41:56	2024-05-21 19:41:56	224.68		2024-05-21	18:50:19	2024-05-21 18:50:19	0.726
2024-03-26 21:43:15	198.375		2024-03-26 21:28:49	135.59		2024-05-21	19:42:26	2024-05-21 19:42:26	224.937		2024-05-21	18:50:49	2024-05-21 18:50:49	0.726
2024-03-26 21:43:45	197.636		2024-03-26 21:29:19	133.165		2024-05-21	19:42:56	2024-05-21 19:42:56	224.102		2024-05-21	18:51:19	2024-05-21 18:51:19	0.716
2024-03-26 21:44:15	198.227		2024-03-26 21:29:49	131.374		2024-05-21	19:43:26	2024-05-21 19:43:26	223.32		2024-05-21	18:51:49	2024-05-21 18:51:49	0.721
2024-03-26 21:44:45	197.642		2024-03-26 21:30:19	132.569		2024-05-21	19:43:56	2024-05-21 19:43:56	225.6		2024-05-21	18:52:19	2024-05-21 18:52:19	0.699
2024-03-26 21:45:15	196.692		2024-03-26 21:30:49	134.543		2024-05-21	19:44:26	2024-05-21 19:44:26	226.279		2024-05-21	18:52:49	2024-05-21 18:52:49	0.718
2024-03-26 21:45:45	196.611		2024-03-26 21:31:19	133.793		2024-05-21	19:44:56	2024-05-21 19:44:56	224.103		2024-05-21	18:53:19	2024-05-21 18:53:19	0.74
2024-03-26 21:46:15	196.753		2024-03-26 21:31:49	132.421		2024-05-21	19:45:26	2024-05-21 19:45:26	225.702		2024-05-21	18:53:49	2024-05-21 18:53:49	0.821
2024-03-26 21:46:45	198.564		2024-03-26 21:32:19	131.264		2024-05-21	19:45:56	2024-05-21 19:45:56	225.198		2024-05-21	18:54:19	2024-05-21 18:54:19	0.849
2024-03-26 21:47:15	198.072		2024-03-26 21:32:49	130.587		2024-05-21	19:46:26	2024-05-21 19:46:26	225.558		2024-05-21	18:54:49	2024-05-21 18:54:49	0.844
2024-03-26 21:47:45	196.051		2024-03-26 21:33:19	130.386		2024-05-21	19:46:56	2024-05-21 19:46:56	224.585		2024-05-21	18:55:19	2024-05-21 18:55:19	0.777
2024-03-26 21:48:15	196.59		2024-03-26 21:33:49	130.581		2024-05-21	19:47:26	2024-05-21 19:47:26	224.696		2024-05-21	18:55:49	2024-05-21 18:55:49	0.78
2024-03-26 21:48:45	197.595		2024-03-26 21:34:19	130.993		2024-05-21	19:47:56	2024-05-21 19:47:56	225.657		2024-05-21	18:56:19	2024-05-21 18:56:19	0.741
2024-03-26 21:49:15	196.885		2024-03-26 21:34:49	131.616		2024-05-21	19:48:26	2024-05-21 19:48:26	225.052		2024-05-21	18:56:49	2024-05-21 18:56:49	0.733
2024-03-26 21:49:45	196.981		2024-03-26 21:35:19	131.837		2024-05-21	19:48:56	2024-05-21 19:48:56	222.69		2024-05-21	18:57:19	2024-05-21 18:57:19	0.721
2024-03-26 21:50:15	198.004		2024-03-26 21:35:49	131.386		2024-05-21	19:49:26	2024-05-21 19:49:26	224.922		2024-05-21	18:57:49	2024-05-21 18:57:49	0.736
2024-03-26 21:50:45	197.646		2024-03-26 21:36:19	130.298		2024-05-21	19:49:56	2024-05-21 19:49:56	223.093		2024-05-21	18:58:19	2024-05-21 18:58:19	0.746
2024-03-26 21:51:15	197.762		2024-03-26 21:36:49	130.13		2024-05-21	19:50:26	2024-05-21 19:50:26	223.781		2024-05-21	18:58:49	2024-05-21 18:58:49	0.743
2024-03-26 21:51:45	197.987		2024-03-26 21:37:19	130.801		2024-05-21	19:50:56	2024-05-21 19:50:56	222.855		2024-05-21	18:59:19	2024-05-21 18:59:19	0.768
2024-03-26 21:52:15	198.392		2024-03-26 21:37:49	130.404		2024-05-21	19:51:26	2024-05-21 19:51:26	218.833		2024-05-21	18:59:49	2024-05-21 18:59:49	0.734
2024-03-26 21:52:45	198.891		2024-03-26 21:38:19	129.976		2024-05-21	19:51:56	2024-05-21 19:51:56	221.08		2024-05-21	19:00:19	2024-05-21 19:00:19	0.72
2024-03-26 21:53:15	199.4		2024-03-26 21:38:49	129.225		2024-05-21	19:52:26	2024-05-21 19:52:26	220.466		2024-05-21	19:00:49	2024-05-21 19:00:49	0.729
2024-03-26 21:53:45	200.38		2024-03-26 21:39:19	127.936		2024-05-21	19:52:56	2024-05-21 19:52:56	222.686		2024-05-21	19:01:19	2024-05-21 19:01:19	0.705
2024-03-26 21:54:15	197.657		2024-03-26 21:39:49	127.267		2024-05-21	19:53:26	2024-05-21 19:53:26	218.843		2024-05-21	19:01:49	2024-05-21 19:01:49	0.703
2024-03-26 21:54:45	197.066		2024-03-26 21:40:19	128.319		2024-05-21	19:53:56	2024-05-21 19:53:56	219.191		2024-05-21	19:02:19	2024-05-21 19:02:19	0.707
2024-03-26 21:55:15	199.182		2024-03-26 21:40:49	130.262		2024-05-21	19:54:26	2024-05-21 19:54:26	217.568		2024-05-21	19:02:49	2024-05-21 19:02:49	0.717
2024-03-26 21:55:45	198.981		2024-03-26 21:41:19	130.548		2024-05-21	19:54:56	2024-05-21 19:54:56	217.088		2024-05-21	19:03:19	2024-05-21 19:03:19	0.705
2024-03-26 21:56:15	198.1		2024-03-26 21:41:49	129.52		2024-05-21	19:55:26	2024-05-21 19:55:26	216.201		2024-05-21	19:03:49	2024-05-21 19:03:49	0.722
2024-03-26 21:56:45	198.854		2024-03-26 21:42:19	129.664		2024-05-21	19:55:56	2024-05-21 19:55:56	217.021		2024-05-21	19:04:19	2024-05-21 19:04:19	0.715
2024-03-26 21:57:15	200.393		2024-03-26 21:42:49	128.95		2024-05-21	19:56:26	2024-05-21 19:56:26	213.313		2024-05-21	19:04:49	2024-05-21 19:04:49	0.722
2024-03-26 21:57:45	200.236		2024-03-26 21:43:19	128.836		2024-05-21	19:56:56	2024-05-21 19:56:56	218.924		2024-05-21	19:05:19	2024-05-21 19:05:19	0.715
2024-03-26 21:58:15	199.768		2024-03-26 21:43:49	129.233		2024-05-21	19:57:26	2024-05-21 19:57:26	219.761		2024-05-21	19:05:49	2024-05-21 19:05:49	0.708
2024-03-26 21:58:45	201.005		2024-03-26 21:44:19	130.155		2024-05-21	19:57:56	2024-05-21 19:57:56	218.64		2024-05-21	19:06:19	2024-05-21 19:06:19	0.749
2024-03-26 21:59:15	199.519		2024-03-26 21:44:49	129.987		2024-05-21	19:58:26	2024-05-21 19:58:26	218.773		2024-05-21	19:06:49	2024-05-21 19:06:49	0.737
2024-03-26 21:59:45	201.426		2024-03-26 21:45:19	128.876		2024-05-21	19:58:56	2024-05-21 19:58:56	218.103		2024-05-21	19:07:19	2024-05-21 19:07:19	0.735
2024-03-26 22:00:15	201.47		2024-03-26 21:45:49	127.984		2024-05-21	19:59:26	2024-05-21 19:59:26	216.579		2024-05-21	19:07:49	2024-05-21 19:07:49	0.71
2024-03-26 22:00:45	200.625		2024-03-26 21:46:19	127.19		2024-05-21	19:59:56	2024-05-21 19:59:56	216.3		2024-05-21	19:08:19	2024-05-21 19:08:19	0.713
2024-03-26 22:01:15	198.036		2024-03-26 21:46:49	126.256		2024-05-21	20:00:26	2024-05-21 20:00:26	217.593		2024-05-21	19:08:49	2024-05-21 19:08:49	0.759
2024-03-26 22:01:45	200.514		2024-03-26 21:47:19	125.418		2024-05-21	20:00:56	2024-05-21 20:00:56	219.896		2024-05-21	19:09:19	2024-05-21 19:09:19	0.7
2024-03-26 22:02:15	198.452		2024-03-26 21:47:49	124.642		2024-05-21	20:01:26	2024-05-21 20:01:26	220.756		2024-05-21	19:09:49	2024-05-21 19:09:49	0.723
2024-03-26 22:02:45	201.621		2024-03-26 21:48:19	123.918		2024-05-21	20:01:56	2024-05-21 20:01:56	221.75		2024-05-21	19:10:19	2024-05-21 19:10:19	0.705
2024-03-26 22:03:15	200.639		2024-03-26 21:48:49	123.276		2024-05-21	20:02:26	2024-05-21 20:02:26	219.633		2024-05-21	19:10:49	2024-05-21 19:10:49	0.688
2024-03-26 22:03:45	200.686		2024-03-26 21:49:19	122.122		2024-05-21	20:02:56	2024-05-21 20:02:56	218.318		2024-05-21	19:11:19	2024-05-21 19:11:19	0.708
2024-03-26 22:04:15	199.822		2024-03-26 21:49:49	120.79		2024-05-21	20:03:26	2024-05-21 20:03:26	219.226		2024-05-21	19:11:49	2024-05-21 19:11:49	0.713
2024-03-26 22:04:45	199.499		2024-03-26 21:50:19	119.588		2024-05-21	20:03:56	2024-05-21 20:03:56	220.521		2024-05-21	19:12:19	2024-05-21 19:12:19	0.715
2024-03-26 22:05:15	199.193		2024-03-26 21:50:49	117.953		2024-05-21	20:04:26	2024-05-21 20:04:26	220.522		2024-05-21	19:12:49	2024-05-21 19:12:49	0.708
2024-03-26 22:05:45	199.562		2024-03-26 21:51:19	116.692		2024-05-21	20:04:56	2024-05-21 20:04:56	221.689		2024-05-21	19:13:19	2024-05-21 19:13:19	0.691
2024-03-26 22:06:15	201.048		2024-03-26 21:51:49	115.346		2024-05-21	20:05:26	2024-05-21 20:05:26	225.162		2024-05-21	19:13:49	2024-05-21 19:13:49	0.708
2024-03-26 22:06:45	197.734		2024-03-26 21:52:19	113.899		2024-05-21	20:05:56	2024-05-21 20:05:56	222.764		2024-05-21	19:14:19	2024-05-21 19:14:19	0.688
2024-03-26 22:07:15	198.947		2024-03-26 21:52:49	112.258		2024-05-21	20:06:26	2024-05-21 20:06:26	221.605		2024-05-21	19:14:49	2024-05-21 19:14:49	0.708
2024-03-26 22:07:45	199.409		2024-03-26 21:53:19	110.679		2024-05-21	20:06:56	2024-05-21 20:06:56	223.153		2024-05-21	19:15:19	2024-05-21 19:15:19	0.705
2024-03-26 22:08:15	198.304		2024-03-26 21:53:49	108.885		2024-05-21	20:07:26	2024-05-21 20:07:26	227.701		2024-05-21	19:15:49	2024-05-21 19:15:49	0.71
2024-03-26 22:08:45	198.895		2024-03-26 21:54:19	106.944		2024-05-21	20:07:56	2024-05-21 20:07:56	229.557		2024-05-21	19:16:19	2024-05-21 19:16:19	0.698
2024-03-26 22:09:15	198.265		2024-03-26 21:54:49	105.178		2024-05-21	20:08:26	2024-05-21 20:08:26	229.716		2024-05-21	19:16:49	2024-05-21 19:16:49	0.693
2024-03-26 22:09:45	198.188		2024-03-26 21:55:19	103.744		2024-05-21	20:08:56	2024-05-21 20:08:56	230.669		2024-05-21	19:17:19	2024-05-21 19:17:19	0.701
2024-03-26 22:10:15	197.518		2024-03-26 21:55:49	102.4		2024-05-21	20:09:26	2024-05-21 20:09:26	228.403		2024-05-21	19:17:49	2024-05-21 19:17:49	0.679
2024-03-26 22:10:45	198.343		2024-03-26 21:56:19	101.284		2024-05-21	20:09:56	2024-05-21 20:09:56	225.716		2024-05-21	19:18:19	2024-05-21 19:18:19	0.713
2024-03-26 22:11:15	197.664		2024-03-26 21:56:49	100.201		2024-05-21	20:10:26	2024-05-21 20:10:26	222.248		2024-05-21	19:18:49	2024-05-21 19:18:49	0.708
2024-03-26 22:11:45	199.098		2024-03-26 21:57:19	95.509		2024-05-21	20:10:56	2024-05-21 20:10:56	224.164		2024-05-21	19:19:19	2024-05-21 19:19:19	0.696
2024-03-26 22:12:15	198.667		2024-03-26 21:57:49	92.354		2024-05-21	20:11:26	2024-05-21 20:11:26	224.2		2024-05-21	19:19:49	2024-05-21 19:19:49	0.696
2024-03-26 22:12:45	198.323		2024-03-26 21:58:19	89.16		2024-05-21	20:11:56	2024-05-21 20:11:56	220.074		2024-05-21	19:20:19	2024-05-21 19:20:19	0.71
2024-03-26 22:13:15	197.211		2024-03-26 21:58:49	90.535		2024-05-21	20:12:26	2024-05-21 20:12:26	223.891		2024-05-21	19:20:49	2024-05-21 19:20:49	0.698
2024-03-26 22:13:45	196.79		2024-03-26 21:59:19	88.876		2024-05-21	20:12:56	2024-05-21 20:12:56	222.255		2024-05-21	19:21:19	2024-05-21 19:21:19	0.691
2024-03-26 22:14:15	197.824		2024-03-26 21:59:49	85.549		2024-05-21	20:13:26	2024-05-21 20:13:26	217.301		2024-05-21	19:21:49	2024-05-21 19:21:49	0.688
2024-03-26 22:14:45	197.788		2024-03-26 22:00:19	87.116		2024-05-21	20:13:56	2024-05-21 20:13:56	216.498		2024-05-21	19:22:19	2024-05-21 19:22:19	0.686
2024-03-26 22:15:15	197.226		2024-03-26 22:00:49	92.227		2024-05-21	20:14:26	2024-05-21 20:14:26	218.865		2024-05-21	19:22:49	2024-05-21 19:22:49	0.713
2024-03-26 22:15:45	198.714		2024-03-26 22:01:19	96.35		2024-05-21	20:14:56	2024-05-21 20:14:56	219.041		2024-05-21	19:23:19	2024-05-21 19:23:19	0.701
2024-03-26 22:16:15	198.493		2024-03-26 22:01:49	99.727		2024-05-21	20:15:26	2024-05-21 20:15:26	221.043		2024-05-21	19:23:49	2024-05-21 19:23:49	0.698
2024-03-26 22:16:45	199.253		2024-03-26 22:02:19	109.376		2024-05-21	20:15:56	2024-05-21 20:15:56	220.393		2024-05-21	19:24:19	2024-05-21 19:24:19	0.703
2024-03-26 22:17:15	199.54		2024-03-26 22:02:49	117.718		2024-05-21	20:16:26	2024-05-21 20:16:26	220.058		2024-05-21	19:24:49	2024-05-21 19:24:49	0.703
2024-03-26 22:17:45	200.208		2024-03-26 22:03:19	119.567		2024-05-21	20:16:56	2024-05-21 20:16:56	212.227		2024-05-21	19:25:19	2024-05-21 19:25:19	0.708
2024-03-26 22:18:15	199.249		2024-03-26 22:03:49	118.033		2024-05-21	20:17:26	2024-05-21 20:17:26	215.696		2024-05-21	19:25:49	2024-05-21 19:25:49	0.698
2024-03-26 22:18:45	196.624		2024-03-26 22:04:19	115.908		2024-05-21	20:17:56	2024-05-21 20:17:56	219.417		2024-05-21	19:26:19	2024-05-21 19:26:19	0.706
2024-03-26 22:19:15	199.126		2024-03-26 22:04:49	114.089		2024-05-21	20:18:26	2024-05-21 20:18:26	218.871		2024-05-21	19:26:49	2024-05-21 19:26:49	0.715
2024-03-26 22:19:45	199.588		2024-03-26 22:05:19	112.31		2024-05-21	20:18:56	2024-05-21 20:18:56	218.745		2024-05-21	19:27:19	2024-05-21 19:27:19	0.701
2024-03-26 22:20:15	198.843		2024-03-26 22:05:49	111.136		2024-05-21	20:19:26	2024-05-21 20:19:26	221.603		2024-05-21	19:27:49	2024-05-21 19:27:49	0.725
2024-03-26 22:20:45	199.792		2024-03-26 22:06:19	109.935		2024-05-21	20:19:56	2024-05-21 20:19:56	223.334		2024-05-21	19:28:19	2024-05-21 19:28:19	0.703
2024-03-26 22:21:15	200.171		2024-03-26 22:06:49	111.286		2024-05-21	20:20:26	2024-05-21 20:20:26	222.434		2024-05-21	19:28:49	2024-05-21 19:28:49	0.725
2024-03-26 22:21:45	202.011		2024-03-26 22:07:19	111.759		2024-05-21	20:20:56	2024-05-21 20:20:56	213.698		2024-05-21	19:29:19	2024-05-21 19:29:19	0.691
2024-03-26 22:22:15	194.018		2024-03-26 22:07:49	111.453		2024-05-21	20:21:26	2024-05-21 20:21:26	217.365		2024-05-21	19:29:49	2024-05-21 19:29:49	0.713
2024-03-26 22:22:45	198.053		2024-03-26 22:08:19	107.815		2024-05-21	20:21:56	2024-05-21 20:21:56	219.659		2024-05-21	19:30:19	2024-05-21 19:30:19	0.725
2024-03-26 22:23:15	203.035		2024-03-26 22:08:49	104.188		2024-05-21	20:22:26	2024-05-21 20:22:26	218.165		2024-05-21	19:30:49	2024-05-21 19:30:49	0.696
2024-03-26 22:23:45	202.642		2024-03-26 22:09:19	101.361		2024-05-21	20:22:56	2024-05-21 20:22:56	220.838		2024-05-21	19:31:19	2024-05-21 19:31:19	0.714
2024-03-26 22:24:15	204.611		2024-03-26 22:09:49	98.793		2024-05-21	20:23:26	2024-05-21 20:23:26	217.472		2024-05-21	19:31:49	2024-05-21 19:31:49	0.716
2024-03-26 22:24:45	201.908		2024-03-26 22:10:19	96.695		2024-05-21	20:23:56	2024-05-21 20:23:56	220.571		2024-05-21	19:32:19	2024-05-21 19:32:19	0.736
2024-03-26 22:25:15	206.833		2024-03-26 22:10:49	94.792		2024-05-21	20:24:26	2024-05-21 20:24:26	217.407		2024-05-21	19:32:49	2024-05-21 19:32:49	0.684
2024-03-26 22:25:45	205.765		2024-03-26 22:11:19	93.041		2024-05-21	20:24:56	2024-05-21 20:24:56	219.046		2024-05-21	19:33:19	2024-05-21 19:33:19	0.711
2024-03-26 22:26:15	203.004		2024-03-26 22:11:49	92.09		2024-05-21	20:25:26	2024-05-21 20:25:26	214.293		2024-05-21	19:33:49	2024-05-21 19:33:49	0.736
2024-03-26 22:26:45	202.274		2024-03-26 22:12:19	92.531		2024-05-21	20:25:56	2024-05-21 20:25:56	218.956		2024-05-21	19:34:19	2024-05-21 19:34:19	0.701
2024-03-26 22:27:15	208.313		2024-03-26 22:12:49	92.55		2024-05-21	20:26:26	2024-05-21 20:26:26	219.914		2024-05-21	19:34:49	2024-05-21 19:34:49	0.716
2024-03-26 22:27:45	204.889		2024-03-26 22:13:19	90.27		2024-05-21	20:26:56	2024-05-21 20:26:56	223.358		2024-05-21	19:35:19	2024-05-21 19:35:19	0.716
2024-03-26 22:28:15	204.269		2024-03-26 22:13:49	84.255		2024-05-21	20:27:26	2024-05-21 20:27:26	223.534		2024-05-21	19:35:49	2024-05-21 19:35:49	0.714
2024-03-26 22:28:45	204.331		2024-03-26 22:14:19	79.755		2024-05-21	20:27:56	2024-05-21 20:27:56	224.405		2024-05-21	19:36:19	2024-05-21 19:36:19	0.711
2024-03-26 22:29:15	203.554		2024-03-26 22:14:49	77.832		2024-05-21	20:28:26	2024-05-21 20:28:26	224.522		2024-05-21	19:36:49	2024-05-21 19:36:49	0.704
2024-03-26 22:29:45	203.362		2024-03-26 22:15:19	77.026		2024-05-21	20:28:56	2024-05-21 20:28:56	225.678		2024-05-21	19:37:19	2024-05-21 19:37:19	0.709
2024-03-26 22:30:15	202.096		2024-03-26 22:15:49	75.883		2024-05-21	20:29:26	2024-05-21 20:29:26	225.449		2024-05-21	19:37:49	2024-05-21 19:37:49	0.714
2024-03-26 22:30:45	201.855		2024-03-26 22:16:19	74.571		2024-05-21	20:29:56	2024-05-21 20:29:56	225.236		2024-05-21	19:38:19	2024-05-21 19:38:19	0.726
2024-03-26 22:31:15	200.847		2024-03-26 22:16:49	73.182		2024-05-21	20:30:26	2024-05-21 20:30:26	225.878		2024-05-21	19:38:49	2024-05-21 19:38:49	0.733
2024-03-26 22:31:45	199.935		2024-03-26 22:17:19	71.342		2024-05-21	20:30:56	2024-05-21 20:30:56	226.402		2024-05-21	19:39:19	2024-05-21 19:39:19	0.733
2024-03-26 22:32:15	201.12		2024-03-26 22:17:49	69.991		2024-05-21	20:31:26	2024-05-21 20:31:26	226.559		2024-05-21	19:39:49	2024-05-21 19:39:49	0.728
2024-03-26 22:32:45	200.778		2024-03-26 22:18:19	69.449		2024-05-21	20:31:56	2024-05-21 20:31:56	226.394		2024-05-21	19:40:19	2024-05-21 19:40:19	0.748
2024-03-26 22:33:15	200.217		2024-03-26 22:18:49	69.993		2024-05-21	20:32:26	2024-05-21 20:32:26	226.803		2024-05-21	19:40:49	2024-05-21 19:40:49	0.716
2024-03-26 22:33:45	196.327		2024-03-26 22:19:19	70.722		2024-05-21	20:32:56	2024-05-21 20:32:56	225.101		2024-05-21	19:41:19	2024-05-21 19:41:19	0.721
2024-03-26 22:34:15	197.908		2024-03-26 22:19:49	71.162		2024-05-21	20:33:26	2024-05-21 20:33:26	225.177		2024-05-21	19:41:49	2024-05-21 19:41:49	0.733
2024-03-26 22:34:45	196.197		2024-03-26 22:20:19	72.44		2024-05-21	20:33:56	2024-05-21 20:33:56	225.404		2024-05-21	19:42:19	2024-05-21 19:42:19	0.743
2024-03-26 22:35:15	196.729		2024-03-26 22:20:49	73.302		2024-05-21	20:34:26	2024-05-21 20:34:26	221.991		2024-05-21	19:42:49	2024-05-21 19:42:49	0.729
2024-03-26 22:35:45	197.242		2024-03-26 22:21:19	73.961		2024-05-21	20:34:56	2024-05-21 20:34:56	225.282		2024-05-21	19:43:19	2024-05-21 19:43:19	0.724
2024-03-26 22:36:15	197.427		2024-03-26 22:21:49	74.098		2024-05-21	20:35:26	2024-05-21 20:35:26	226.026		2024-05-21	19:43:49	2024-05-21 19:43:49	0.748
2024-03-26 22:36:45	200.256		2024-03-26 22:22:19	73.27		2024-05-21	20:35:56	2024-05-21 20:35:56	223.93		2024-05-21	19:44:19	2024-05-21 19:44:19	0.726
2024-03-26 22:37:15	199.387		2024-03-26 22:22:49	73.083		2024-05-21	20:36:26	2024-05-21 20:36:26	223.365		2024-05-21	19:44:49	2024-05-21 19:44:49	0.755
2024-03-26 22:37:45	197.737		2024-03-26 22:23:19	73.367		2024-05-21	20:36:56	2024-05-21 20:36:56	223.541		2024-05-21	19:45:19	2024-05-21 19:45:19	0.775
2024-03-26 22:38:15	195.734		2024-03-26 22:23:49	73.973		2024-05-21	20:37:26	2024-05-21 20:37:26	221.962		2024-05-21	19:45:49	2024-05-21 19:45:49	0.733
2024-03-26 22:38:45	196.267		2024-03-26 22:24:19	74.438		2024-05-21	20:37:56	2024-05-21 20:37:56	221.689		2024-05-21	19:46:19	2024-05-21 19:46:19	0.748
2024-03-26 22:39:15	196.768		2024-03-26 22:24:49	74.568		2024-05-21	20:38:26	2024-05-21 20:38:26	218.793		2024-05-21	19:46:49	2024-05-21 19:46:49	0.738
2024-03-26 22:39:45	198.2		2024-03-26 22:25:19	74.543		2024-05-21	20:38:56	2024-05-21 20:38:56	219.847		2024-05-21	19:47:19	2024-05-21 19:47:19	0.746
2024-03-26 22:40:15	200.019		2024-03-26 22:25:49	74.22		2024-05-21	20:39:26	2024-05-21 20:39:26	220.637		2024-05-21	19:47:49	2024-05-21 19:47:49	0.731
2024-03-26 22:40:45	199.047		2024-03-26 22:26:19	73.184		2024-05-21	20:39:56	2024-05-21 20:39:56	219.748		2024-05-21	19:48:19	2024-05-21 19:48:19	0.726
2024-03-26 22:41:15	197.673		2024-03-26 22:26:49	72.484		2024-05-21	20:40:26	2024-05-21 20:40:26	220.364		2024-05-21	19:48:49	2024-05-21 19:48:49	0.765
2024-03-26 22:41:45	197.832		2024-03-26 22:27:19	72.422		2024-05-21	20:40:56	2024-05-21 20:40:56	220.854		2024-05-21	19:49:19	2024-05-21 19:49:19	0.751
2024-03-26 22:42:15	193.734		2024-03-26 22:27:49	72.074		2024-05-21	20:41:26	2024-05-21 20:41:26	220.146		2024-05-21	19:49:49	2024-05-21 19:49:49	0.76
2024-03-26 22:42:45	195.769		2024-03-26 22:28:19	72.731		2024-05-21	20:41:56	2024-05-21 20:41:56	218.903		2024-05-21	19:50:19	2024-05-21 19:50:19	0.743
2024-03-26 22:43:15	196.187		2024-03-26 22:28:49	72.918		2024-05-21	20:42:26	2024-05-21 20:42:26	219.857		2024-05-21	19:50:49	2024-05-21 19:50:49	0.738
2024-03-26 22:43:45	195.223		2024-03-26 22:29:19	73.708		2024-05-21	20:42:56	2024-05-21 20:42:56	216.357		2024-05-21	19:51:19	2024-05-21 19:51:19	0.728
2024-03-26 22:44:15	195.374		2024-03-26 22:29:49	75.151		2024-05-21	20:43:26	2024-05-21 20:43:26	219.88		2024-05-21	19:51:49	2024-05-21 19:51:49	0.741
2024-03-26 22:44:45	194.996		2024-03-26 22:30:19	76.385		2024-05-21	20:43:56	2024-05-21 20:43:56	220.147		2024-05-21	19:52:19	2024-05-21 19:52:19	0.721
2024-03-26 22:45:15	194.643		2024-03-26 22:30:49	76.61		2024-05-21	20:44:26	2024-05-21 20:44:26	220.973		2024-05-21	19:52:49	2024-05-21 19:52:49	0.731
2024-03-26 22:45:45	197.306		2024-03-26 22:31:19	75.895		2024-05-21	20:44:56	2024-05-21 20:44:56	220.399		2024-05-21	19:53:19	2024-05-21 19:53:19	0.726
2024-03-26 22:46:15	194.378		2024-03-26 22:31:49	75.152		2024-05-21	20:45:26	2024-05-21 20:45:26	220.104		2024-05-21	19:53:49	2024-05-21 19:53:49	0.736
2024-03-26 22:46:45	194.277		2024-03-26 22:32:19	74.61		2024-05-21	20:45:56	2024-05-21 20:45:56	220.679		2024-05-21	19:54:19	2024-05-21 19:54:19	0.736
2024-03-26 22:47:15	193.695		2024-03-26 22:32:49	73.668		2024-05-21	20:46:26	2024-05-21 20:46:26	221.163		2024-05-21	19:54:49	2024-05-21 19:54:49	0.724
2024-03-26 22:47:45	193.879		2024-03-26 22:33:19	71.271		2024-05-21	20:46:56	2024-05-21 20:46:56	219.845		2024-05-21	19:55:19	2024-05-21 19:55:19	0.738
2024-03-26 22:48:15	194.102		2024-03-26 22:33:49	67.678		2024-05-21	20:47:26	2024-05-21 20:47:26	220.083		2024-05-21	19:55:49	2024-05-21 19:55:49	0.738
2024-03-26 22:48:45	192.624		2024-03-26 22:34:19	64.635		2024-05-21	20:47:56	2024-05-21 20:47:56	213.857		2024-05-21	19:56:19	2024-05-21 19:56:19	0.728
2024-03-26 22:49:15	191.914		2024-03-26 22:34:49	63.666		2024-05-21	20:48:26	2024-05-21 20:48:26	211.621		2024-05-21	19:56:49	2024-05-21 19:56:49	0.711
2024-03-26 22:49:45	195.579		2024-03-26 22:35:19	62.313		2024-05-21	20:48:56	2024-05-21 20:48:56	217.111		2024-05-21	19:57:19	2024-05-21 19:57:19	0.701
2024-03-26 22:50:15	197.366		2024-03-26 22:35:49	59.804		2024-05-21	20:49:26	2024-05-21 20:49:26	218.936		2024-05-21	19:57:49	2024-05-21 19:57:49	0.719
2024-03-26 22:50:45	197.253		2024-03-26 22:36:19	56.654		2024-05-21	20:49:56	2024-05-21 20:49:56	217.307		2024-05-21	19:58:19	2024-05-21 19:58:19	0.709
2024-03-26 22:51:15	196.275		2024-03-26 22:36:49	54.536		2024-05-21	20:50:26	2024-05-21 20:50:26	216.921		2024-05-21	19:58:49	2024-05-21 19:58:49	0.712
2024-03-26 22:51:45	196.856		2024-03-26 22:37:19	53.803		2024-05-21	20:50:56	2024-05-21 20:50:56	213.769		2024-05-21	19:59:19	2024-05-21 19:59:19	0.709
2024-03-26 22:52:15	195.822		2024-03-26 22:37:49	53.392		2024-05-21	20:51:26	2024-05-21 20:51:26	217.079		2024-05-21	19:59:49	2024-05-21 19:59:49	0.731
2024-03-26 22:52:45	195.759		2024-03-26 22:38:19	52.633		2024-05-21	20:51:56	2024-05-21 20:51:56	219.235		2024-05-21	20:00:19	2024-05-21 20:00:19	0.716
2024-03-26 22:53:15	195.759		2024-03-26 22:38:49	49.853		2024-05-21	20:52:26	2024-05-21 20:52:26	220.659		2024-05-21	20:00:49	2024-05-21 20:00:49	0.741
2024-03-26 22:53:45	196.036		2024-03-26 22:39:19	47.585		2024-05-21	20:52:56	2024-05-21 20:52:56	221.865		2024-05-21	20:01:19	2024-05-21 20:01:19	0.717
2024-03-26 22:54:15	195.822		2024-03-26 22:39:49	46.064		2024-05-21	20:53:26	2024-05-21 20:53:26	221.658		2024-05-21	20:01:49	2024-05-21 20:01:49	0.724
2024-03-26 22:54:45	196.703		2024-03-26 22:40:19	46.08		2024-05-21	20:53:56	2024-05-21 20:53:56	220.196		2024-05-21	20:02:19	2024-05-21 20:02:19	0.734
2024-03-26 22:55:15	197.431		2024-03-26 22:40:49	45.972		2024-05-21	20:54:26	2024-05-21 20:54:26	219.676		2024-05-21	20:02:49	2024-05-21 20:02:49	0.726
2024-03-26 22:55:45	195.658		2024-03-26 22:41:19	45.829		2024-05-21	20:54:56	2024-05-21 20:54:56	217.756		2024-05-21	20:03:19	2024-05-21 20:03:19	0.741
2024-03-26 22:56:15	196.767		2024-03-26 22:41:49	45.355		2024-05-21	20:55:26	2024-05-21 20:55:26	212.451		2024-05-21	20:03:49	2024-05-21 20:03:49	0.744
2024-03-26 22:56:45	197.452		2024-03-26 22:42:19	44.493		2024-05-21	20:55:56	2024-05-21 20:55:56	211.461		2024-05-21	20:04:19	2024-05-21 20:04:19	0.719
2024-03-26 22:57:15	195.352		2024-03-26 22:42:49	43.423		2024-05-21	20:56:26	2024-05-21 20:56:26	219.699		2024-05-21	20:04:49	2024-05-21 20:04:49	0.725
2024-03-26 22:57:45	195.67		2024-03-26 22:43:19	41.673		2024-05-21	20:56:56	2024-05-21 20:56:56	210.257		2024-05-21	20:05:19	2024-05-21 20:05:19	0.727
2024-03-26 22:58:15	195.344		2024-03-26 22:43:49	39.413		2024-05-21	20:57:26	2024-05-21 20:57:26	210.806		2024-05-21	20:05:49	2024-05-21 20:05:49	0.729
2024-03-26 22:58:45	194.441		2024-03-26 22:44:19	38.771		2024-05-21	20:57:56	2024-05-21 20:57:56	215.216		2024-05-21	20:06:19	2024-05-21 20:06:19	0.722
2024-03-26 22:59:15	192.435		2024-03-26 22:44:49	38.673		2024-05-21	20:58:26	2024-05-21 20:58:26	214.006		2024-05-21	20:06:49	2024-05-21 20:06:49	0.71
2024-03-26 22:59:45	195.064		2024-03-26 22:45:19	38.341		2024-05-21	20:58:56	2024-05-21 20:58:56	215.364		2024-05-21	20:07:19	2024-05-21 20:07:19	0.749
2024-03-26 23:00:15	192.546		2024-03-26 22:45:49	37.564		2024-05-21	20:59:26	2024-05-21 20:59:26	218.995		2024-05-21	20:07:49	2024-05-21 20:07:49	0.73
2024-03-26 23:00:45	194.76		2024-03-26 22:46:19	36.783		2024-05-21	20:59:56	2024-05-21 20:59:56	219.7		2024-05-21	20:08:19	2024-05-21 20:08:19	0.713
2024-03-26 23:01:15	197.209		2024-03-26 22:46:49	35.569		2024-05-21	21:00:26	2024-05-21 21:00:26	218.601		2024-05-21	20:08:49	2024-05-21 20:08:49	0.725
2024-03-26 23:01:45	193.976		2024-03-26 22:47:19	34.289		2024-05-21	21:00:56	2024-05-21 21:00:56	215.562		2024-05-21	20:09:19	2024-05-21 20:09:19	0.713
2024-03-26 23:02:15	196.669		2024-03-26 22:47:49	33.391		2024-05-21	21:01:26	2024-05-21 21:01:26	212.652		2024-05-21	20:09:49	2024-05-21 20:09:49	0.722
2024-03-26 23:02:45	196.432		2024-03-26 22:48:19	32.472		2024-05-21	21:01:56	2024-05-21 21:01:56	211.047		2024-05-21	20:10:19	2024-05-21 20:10:19	0.73
2024-03-26 23:03:15	189.557		2024-03-26 22:48:49	32.791		2024-05-21	21:02:26	2024-05-21 21:02:26	211.145		2024-05-21	20:10:49	2024-05-21 20:10:49	0.705
2024-03-26 23:03:45	192.101		2024-03-26 22:49:19	32.64		2024-05-21	21:02:56	2024-05-21 21:02:56	212.159		2024-05-21	20:11:19	2024-05-21 20:11:19	0.73
2024-03-26 23:04:15	195.793		2024-03-26 22:49:49	31.792		2024-05-21	21:03:26	2024-05-21 21:03:26	216.029		2024-05-21	20:11:49	2024-05-21 20:11:49	0.735
2024-03-26 23:04:45	193.349		2024-03-26 22:50:19	28.867		2024-05-21	21:03:56	2024-05-21 21:03:56	218.011		2024-05-21	20:12:19	2024-05-21 20:12:19	0.74
2024-03-26 23:05:15	192.603		2024-03-26 22:50:49	27.086		2024-05-21	21:04:26	2024-05-21 21:04:26	219.099		2024-05-21	20:12:49	2024-05-21 20:12:49	0.722
2024-03-26 23:05:45	183.26		2024-03-26 22:51:19	25.929		2024-05-21	21:04:56	2024-05-21 21:04:56	218.156		2024-05-21	20:13:19	2024-05-21 20:13:19	0.722
2024-03-26 23:06:15	182.139		2024-03-26 22:51:49	24.707		2024-05-21	21:05:26	2024-05-21 21:05:26	217.779		2024-05-21	20:13:49	2024-05-21 20:13:49	0.715
2024-03-26 23:06:45	193.838		2024-03-26 22:52:19	24.029		2024-05-21	21:05:56	2024-05-21 21:05:56	219.113		2024-05-21	20:14:19	2024-05-21 20:14:19	0.725
2024-03-26 23:07:15	195.551		2024-03-26 22:52:49	24.519		2024-05-21	21:06:26	2024-05-21 21:06:26	218.646		2024-05-21	20:14:49	2024-05-21 20:14:49	0.74
2024-03-26 23:07:45	192.44		2024-03-26 22:53:19	24.545		2024-05-21	21:06:56	2024-05-21 21:06:56	216.332		2024-05-21	20:15:19	2024-05-21 20:15:19	0.715
2024-03-26 23:08:15	191.694		2024-03-26 22:53:49	24.202		2024-05-21	21:07:26	2024-05-21 21:07:26	217.907		2024-05-21	20:15:49	2024-05-21 20:15:49	0.705
2024-03-26 23:08:45	191.564		2024-03-26 22:54:19	24.625		2024-05-21	21:07:56	2024-05-21 21:07:56	217.029		2024-05-21	20:16:19	2024-05-21 20:16:19	0.737
2024-03-26 23:09:15	192.644		2024-03-26 22:54:49	25.138		2024-05-21	21:08:26	2024-05-21 21:08:26	216.861		2024-05-21	20:16:49	2024-05-21 20:16:49	0.713
2024-03-26 23:09:45	197.476		2024-03-26 22:55:19	25.803		2024-05-21	21:08:56	2024-05-21 21:08:56	216.613		2024-05-21	20:17:19	2024-05-21 20:17:19	0.73
2024-03-26 23:10:15	194.348		2024-03-26 22:55:49	26.498		2024-05-21	21:09:26	2024-05-21 21:09:26	217.021		2024-05-21	20:17:49	2024-05-21 20:17:49	0.728
2024-03-26 23:10:45	194.104		2024-03-26 22:56:19	26.709		2024-05-21	21:09:56	2024-05-21 21:09:56	214.689		2024-05-21	20:18:19	2024-05-21 20:18:19	0.742
2024-03-26 23:11:15	196.335		2024-03-26 22:56:49	27.141		2024-05-21	21:10:26	2024-05-21 21:10:26	213.572		2024-05-21	20:18:49	2024-05-21 20:18:49	0.72
2024-03-26 23:11:45	194.715		2024-03-26 22:57:19	27.251		2024-05-21	21:10:56	2024-05-21 21:10:56	213.289		2024-05-21	20:19:19	2024-05-21 20:19:19	0.723
2024-03-26 23:12:15	193.07		2024-03-26 22:57:49	26.945		2024-05-21	21:11:26	2024-05-21 21:11:26	216.719		2024-05-21	20:19:49	2024-05-21 20:19:49	0.75
2024-03-26 23:12:45	194.363		2024-03-26 22:58:19	26.406		2024-05-21	21:11:56	2024-05-21 21:11:56	216.84		2024-05-21	20:20:19	2024-05-21 20:20:19	0.717
2024-03-26 23:13:15	194.876		2024-03-26 22:58:49	25.801		2024-05-21	21:12:26	2024-05-21 21:12:26	211.224		2024-05-21	20:20:49	2024-05-21 20:20:49	0.72
2024-03-26 23:13:45	194.196		2024-03-26 22:59:19	25.603		2024-05-21	21:12:56	2024-05-21 21:12:56	209.347		2024-05-21	20:21:19	2024-05-21 20:21:19	0.742
2024-03-26 23:14:15	195.214		2024-03-26 22:59:49	25.62		2024-05-21	21:13:26	2024-05-21 21:13:26	207.905		2024-05-21	20:21:49	2024-05-21 20:21:49	0.73
2024-03-26 23:14:45	192.451		2024-03-26 23:00:19	25.026		2024-05-21	21:13:56	2024-05-21 21:13:56	202.146		2024-05-21	20:22:19	2024-05-21 20:22:19	0.747
2024-03-26 23:15:15	194.734		2024-03-26 23:00:49	24.496		2024-05-21	21:14:26	2024-05-21 21:14:26	204.471		2024-05-21	20:22:49	2024-05-21 20:22:49	0.72
2024-03-26 23:15:45	193.729		2024-03-26 23:01:19	23.704		2024-05-21	21:14:56	2024-05-21 21:14:56	208.24		2024-05-21	20:23:19	2024-05-21 20:23:19	0.722
2024-03-26 23:16:15	194.679		2024-03-26 23:01:49	21.913		2024-05-21	21:15:26	2024-05-21 21:15:26	207.525		2024-05-21	20:23:49	2024-05-21 20:23:49	0.735
2024-03-26 23:16:45	195.83		2024-03-26 23:02:19	19.736		2024-05-21	21:15:56	2024-05-21 21:15:56	212.798		2024-05-21	20:24:19	2024-05-21 20:24:19	0.723
2024-03-26 23:17:15	195.166		2024-03-26 23:02:49	18.393		2024-05-21	21:16:26	2024-05-21 21:16:26	212.175		2024-05-21	20:24:49	2024-05-21 20:24:49	0.72
2024-03-26 23:17:45	194.977		2024-03-26 23:03:19	17.593		2024-05-21	21:16:56	2024-05-21 21:16:56	215.333		2024-05-21	20:25:19	2024-05-21 20:25:19	0.715
2024-03-26 23:18:15	195.053		2024-03-26 23:03:49	17.494		2024-05-21	21:17:26	2024-05-21 21:17:26	213.948		2024-05-21	20:25:49	2024-05-21 20:25:49	0.732
2024-03-26 23:18:45	196.851		2024-03-26 23:04:19	17.782		2024-05-21	21:17:56	2024-05-21 21:17:56	208.936		2024-05-21	20:26:19	2024-05-21 20:26:19	0.725
2024-03-26 23:19:15	196.524		2024-03-26 23:04:49	17.453		2024-05-21	21:18:26	2024-05-21 21:18:26	208.277		2024-05-21	20:26:49	2024-05-21 20:26:49	0.74
2024-03-26 23:19:45	195.308		2024-03-26 23:05:19	17.583		2024-05-21	21:18:56	2024-05-21 21:18:56	204.224		2024-05-21	20:27:19	2024-05-21 20:27:19	0.725
2024-03-26 23:20:15	197.334		2024-03-26 23:05:49	19.89		2024-05-21	21:19:26	2024-05-21 21:19:26	208.607		2024-05-21	20:27:49	2024-05-21 20:27:49	0.71
2024-03-26 23:20:45	198.204		2024-03-26 23:06:19	22.317		2024-05-21	21:19:56	2024-05-21 21:19:56	207.582		2024-05-21	20:28:19	2024-05-21 20:28:19	0.747
2024-03-26 23:21:15	197.985		2024-03-26 23:06:49	23.543		2024-05-21	21:20:26	2024-05-21 21:20:26	209.79		2024-05-21	20:28:49	2024-05-21 20:28:49	0.727
2024-03-26 23:21:45	194.268		2024-03-26 23:07:19	24.386		2024-05-21	21:20:56	2024-05-21 21:20:56	206.681		2024-05-21	20:29:19	2024-05-21 20:29:19	0.742
2024-03-26 23:22:15	194.492		2024-03-26 23:07:49	24.609		2024-05-21	21:21:26	2024-05-21 21:21:26	210.035		2024-05-21	20:29:49	2024-05-21 20:29:49	0.737
2024-03-26 23:22:45	192.51		2024-03-26 23:08:19	24.636		2024-05-21	21:21:56	2024-05-21 21:21:56	196.217		2024-05-21	20:30:19	2024-05-21 20:30:19	0.762
2024-03-26 23:23:15	194.191		2024-03-26 23:08:49	24.048		2024-05-21	21:22:26	2024-05-21 21:22:26	201.806		2024-05-21	20:30:49	2024-05-21 20:30:49	0.779
2024-03-26 23:23:45	194.871		2024-03-26 23:09:19	22.928		2024-05-21	21:22:56	2024-05-21 21:22:56	201.087		2024-05-21	20:31:19	2024-05-21 20:31:19	0.764
2024-03-26 23:24:15	196.194		2024-03-26 23:09:49	20.245		2024-05-21	21:23:26	2024-05-21 21:23:26	202.388		2024-05-21	20:31:49	2024-05-21 20:31:49	0.73
2024-03-26 23:24:45	195.476		2024-03-26 23:10:19	18.017		2024-05-21	21:23:56	2024-05-21 21:23:56	202.224		2024-05-21	20:32:19	2024-05-21 20:32:19	0.767
2024-03-26 23:25:15	194.66		2024-03-26 23:10:49	16.551		2024-05-21	21:24:26	2024-05-21 21:24:26	205.407		2024-05-21	20:32:49	2024-05-21 20:32:49	0.762
2024-03-26 23:25:45	197.211		2024-03-26 23:11:19	15.57		2024-05-21	21:24:56	2024-05-21 21:24:56	206.009		2024-05-21	20:33:19	2024-05-21 20:33:19	0.762
2024-03-26 23:26:15	196.409		2024-03-26 23:11:49	14.61		2024-05-21	21:25:26	2024-05-21 21:25:26	206.721		2024-05-21	20:33:49	2024-05-21 20:33:49	0.755
2024-03-26 23:26:45	196.508		2024-03-26 23:12:19	14.052		2024-05-21	21:25:56	2024-05-21 21:25:56	205.232		2024-05-21	20:34:19	2024-05-21 20:34:19	0.757
2024-03-26 23:27:15	199.795		2024-03-26 23:12:49	13.611		2024-05-21	21:26:26	2024-05-21 21:26:26	203.053		2024-05-21	20:34:49	2024-05-21 20:34:49	0.732
2024-03-26 23:27:45	199.129		2024-03-26 23:13:19	13.453		2024-05-21	21:26:56	2024-05-21 21:26:56	203.916		2024-05-21	20:35:19	2024-05-21 20:35:19	0.735
2024-03-26 23:28:15	199		2024-03-26 23:13:49	13.77		2024-05-21	21:27:26	2024-05-21 21:27:26	208.6		2024-05-21	20:35:49	2024-05-21 20:35:49	0.725
2024-03-26 23:28:45	198.943		2024-03-26 23:14:19	13.782		2024-05-21	21:27:56	2024-05-21 21:27:56	211.229		2024-05-21	20:36:19	2024-05-21 20:36:19	0.745
2024-03-26 23:29:15	198.662		2024-03-26 23:14:49	13.819		2024-05-21	21:28:26	2024-05-21 21:28:26	211.544		2024-05-21	20:36:49	2024-05-21 20:36:49	0.735
2024-03-26 23:29:45	197.416		2024-03-26 23:15:19	14.056		2024-05-21	21:28:56	2024-05-21 21:28:56	211.423		2024-05-21	20:37:19	2024-05-21 20:37:19	0.742
2024-03-26 23:30:15	197.494		2024-03-26 23:15:49	14.491		2024-05-21	21:29:26	2024-05-21 21:29:26	210.257		2024-05-21	20:37:49	2024-05-21 20:37:49	0.75
2024-03-26 23:30:45	198.379		2024-03-26 23:16:19	14.631		2024-05-21	21:29:56	2024-05-21 21:29:56	211.396		2024-05-21	20:38:19	2024-05-21 20:38:19	0.745
2024-03-26 23:31:15	194.811		2024-03-26 23:16:49	14.056		2024-05-21	21:30:26	2024-05-21 21:30:26	212.237		2024-05-21	20:38:49	2024-05-21 20:38:49	0.742
2024-03-26 23:31:45	196.777		2024-03-26 23:17:19	13.454		2024-05-21	21:30:56	2024-05-21 21:30:56	212.031		2024-05-21	20:39:19	2024-05-21 20:39:19	0.742
2024-03-26 23:32:15	195.911		2024-03-26 23:17:49	13.504		2024-05-21	21:31:26	2024-05-21 21:31:26	210.039		2024-05-21	20:39:49	2024-05-21 20:39:49	0.715
2024-03-26 23:32:45	193.829		2024-03-26 23:18:19	13.728		2024-05-21	21:31:56	2024-05-21 21:31:56	210.63		2024-05-21	20:40:19	2024-05-21 20:40:19	0.747
2024-03-26 23:33:15	196.753		2024-03-26 23:18:49	13.673		2024-05-21	21:32:26	2024-05-21 21:32:26	211.828		2024-05-21	20:40:49	2024-05-21 20:40:49	0.742
2024-03-26 23:33:45	198.002		2024-03-26 23:19:19	13.761		2024-05-21	21:32:56	2024-05-21 21:32:56	212.177		2024-05-21	20:41:19	2024-05-21 20:41:19	0.757
2024-03-26 23:34:15	197.416		2024-03-26 23:19:49	13.671		2024-05-21	21:33:26	2024-05-21 21:33:26	212.415		2024-05-21	20:41:49	2024-05-21 20:41:49	0.73
2024-03-26 23:34:45	201.027		2024-03-26 23:20:19	13.789		2024-05-21	21:33:56	2024-05-21 21:33:56	214.019		2024-05-21	20:42:19	2024-05-21 20:42:19	0.74
2024-03-26 23:35:15	203.05		2024-03-26 23:20:49	13.943		2024-05-21	21:34:26	2024-05-21 21:34:26	213.202		2024-05-21	20:42:49	2024-05-21 20:42:49	0.74
2024-03-26 23:35:45	202.745		2024-03-26 23:21:19	13.883		2024-05-21	21:34:56	2024-05-21 21:34:56	213.127		2024-05-21	20:43:19	2024-05-21 20:43:19	0.747
2024-03-26 23:36:15	202.393		2024-03-26 23:21:49	13.335		2024-05-21	21:35:26	2024-05-21 21:35:26	214.58		2024-05-21	20:43:49	2024-05-21 20:43:49	0.727
2024-03-26 23:36:45	199.807		2024-03-26 23:22:19	12.623		2024-05-21	21:35:56	2024-05-21 21:35:56	216.306		2024-05-21	20:44:19	2024-05-21 20:44:19	0.742
2024-03-26 23:37:15	199.403		2024-03-26 23:22:49	11.313		2024-05-21	21:36:26	2024-05-21 21:36:26	212.117		2024-05-21	20:44:49	2024-05-21 20:44:49	0.723
2024-03-26 23:37:45	199.961		2024-03-26 23:23:19	9.79		2024-05-21	21:36:56	2024-05-21 21:36:56	212.223		2024-05-21	20:45:19	2024-05-21 20:45:19	0.745
2024-03-26 23:38:15	199.805		2024-03-26 23:23:49	8.504		2024-05-21	21:37:26	2024-05-21 21:37:26	210.824		2024-05-21	20:45:49	2024-05-21 20:45:49	0.742
2024-03-26 23:38:45	198.964		2024-03-26 23:24:19	8.067		2024-05-21	21:37:56	2024-05-21 21:37:56	210.069		2024-05-21	20:46:19	2024-05-21 20:46:19	0.735
2024-03-26 23:39:15	201.121		2024-03-26 23:24:49	7.302		2024-05-21	21:38:26	2024-05-21 21:38:26	210.33		2024-05-21	20:46:49	2024-05-21 20:46:49	0.752
2024-03-26 23:39:45	199.909		2024-03-26 23:25:19	6.75		2024-05-21	21:38:56	2024-05-21 21:38:56	214.309		2024-05-21	20:47:19	2024-05-21 20:47:19	0.725
2024-03-26 23:40:15	200.675		2024-03-26 23:25:49	6.408		2024-05-21	21:39:26	2024-05-21 21:39:26	213.997		2024-05-21	20:47:49	2024-05-21 20:47:49	0.737
2024-03-26 23:40:45	199.175		2024-03-26 23:26:19	6.125		2024-05-21	21:39:56	2024-05-21 21:39:56	212.777		2024-05-21	20:48:19	2024-05-21 20:48:19	0.718
2024-03-26 23:41:15	198.545		2024-03-26 23:26:49	5.946		2024-05-21	21:40:26	2024-05-21 21:40:26	211.669		2024-05-21	20:48:49	2024-05-21 20:48:49	0.737
2024-03-26 23:41:45	197.573		2024-03-26 23:27:19	5.655		2024-05-21	21:40:56	2024-05-21 21:40:56	203.675		2024-05-21	20:49:19	2024-05-21 20:49:19	0.74
2024-03-26 23:42:15	197.951		2024-03-26 23:27:49	5.332		2024-05-21	21:41:26	2024-05-21 21:41:26	211.732		2024-05-21	20:49:49	2024-05-21 20:49:49	0.74
2024-03-26 23:42:45	201.746		2024-03-26 23:28:19	6.275		2024-05-21	21:41:56	2024-05-21 21:41:56	211.699		2024-05-21	20:50:19	2024-05-21 20:50:19	0.737
2024-03-26 23:43:15	198.227		2024-03-26 23:28:49	6.465		2024-05-21	21:42:26	2024-05-21 21:42:26	212.118		2024-05-21	20:50:49	2024-05-21 20:50:49	0.74
2024-03-26 23:43:45	200.245		2024-03-26 23:29:19	5.844		2024-05-21	21:42:56	2024-05-21 21:42:56	213.405		2024-05-21	20:51:19	2024-05-21 20:51:19	0.745
2024-03-26 23:44:15	200.21		2024-03-26 23:29:49	6.57		2024-05-21	21:43:26	2024-05-21 21:43:26	215.022		2024-05-21	20:51:49	2024-05-21 20:51:49	0.75
2024-03-26 23:44:45	194.92		2024-03-26 23:30:19	6.484		2024-05-21	21:43:56	2024-05-21 21:43:56	213.99		2024-05-21	20:52:19	2024-05-21 20:52:19	0.74
2024-03-26 23:45:15	196.023		2024-03-26 23:30:49	5.676		2024-05-21	21:44:26	2024-05-21 21:44:26	212.996		2024-05-21	20:52:49	2024-05-21 20:52:49	0.735
2024-03-26 23:45:45	196.528		2024-03-26 23:31:19	5.244		2024-05-21	21:44:56	2024-05-21 21:44:56	213.322		2024-05-21	20:53:19	2024-05-21 20:53:19	0.75
2024-03-26 23:46:15	197.469		2024-03-26 23:31:49	5.266		2024-05-21	21:45:26	2024-05-21 21:45:26	214.061		2024-05-21	20:53:49	2024-05-21 20:53:49	0.752
2024-03-26 23:46:45	198.892		2024-03-26 23:32:19	5.204		2024-05-21	21:45:56	2024-05-21 21:45:56	213.831		2024-05-21	20:54:19	2024-05-21 20:54:19	0.74
2024-03-26 23:47:15	198.805		2024-03-26 23:32:49	5.132		2024-05-21	21:46:26	2024-05-21 21:46:26	214.476		2024-05-21	20:54:49	2024-05-21 20:54:49	0.74
2024-03-26 23:47:45	200.758		2024-03-26 23:33:19	5.14		2024-05-21	21:46:56	2024-05-21 21:46:56	213.481		2024-05-21	20:55:19	2024-05-21 20:55:19	0.738
2024-03-26 23:48:15	200.214		2024-03-26 23:33:49	4.899		2024-05-21	21:47:26	2024-05-21 21:47:26	213.142		2024-05-21	20:55:49	2024-05-21 20:55:49	0.752
2024-03-26 23:48:45	199.841		2024-03-26 23:34:19	4.516		2024-05-21	21:47:56	2024-05-21 21:47:56	212.658		2024-05-21	20:56:19	2024-05-21 20:56:19	0.753
2024-03-26 23:49:15	200.077		2024-03-26 23:34:49	4.271		2024-05-21	21:48:26	2024-05-21 21:48:26	211.781		2024-05-21	20:56:49	2024-05-21 20:56:49	0.76
2024-03-26 23:49:45	198.583		2024-03-26 23:35:19	4.212		2024-05-21	21:48:56	2024-05-21 21:48:56	211.544		2024-05-21	20:57:19	2024-05-21 20:57:19	0.742
2024-03-26 23:50:15	201.072		2024-03-26 23:35:49	4.327		2024-05-21	21:49:26	2024-05-21 21:49:26	211.389		2024-05-21	20:57:49	2024-05-21 20:57:49	0.735
2024-03-26 23:50:45	200.148		2024-03-26 23:36:19	4.692		2024-05-21	21:49:56	2024-05-21 21:49:56	211.205		2024-05-21	20:58:19	2024-05-21 20:58:19	0.728
2024-03-26 23:51:15	201.072		2024-03-26 23:36:49	4.836		2024-05-21	21:50:26	2024-05-21 21:50:26	210.579		2024-05-21	20:58:49	2024-05-21 20:58:49	0.743
2024-03-26 23:51:45	200.961		2024-03-26 23:37:19	4.68		2024-05-21	21:50:56	2024-05-21 21:50:56	210.269		2024-05-21	20:59:19	2024-05-21 20:59:19	0.735
2024-03-26 23:52:15	199.072		2024-03-26 23:37:49	4.644		2024-05-21	21:51:26	2024-05-21 21:51:26	209.544		2024-05-21	20:59:49	2024-05-21 20:59:49	0.731
2024-03-26 23:52:45	200.62		2024-03-26 23:38:19	4.883		2024-05-21	21:51:56	2024-05-21 21:51:56	208.339		2024-05-21	21:00:19	2024-05-21 21:00:19	0.753
2024-03-26 23:53:15	198.236		2024-03-26 23:38:49	5.138		2024-05-21	21:52:26	2024-05-21 21:52:26	209.951		2024-05-21	21:00:49	2024-05-21 21:00:49	0.74
2024-03-26 23:53:45	200.214		2024-03-26 23:39:19	6.184		2024-05-21	21:52:56	2024-05-21 21:52:56	210.419		2024-05-21	21:01:19	2024-05-21 21:01:19	0.748
2024-03-26 23:54:15	201.26		2024-03-26 23:39:49	7.425		2024-05-21	21:53:26	2024-05-21 21:53:26	214.313		2024-05-21	21:01:49	2024-05-21 21:01:49	0.743
2024-03-26 23:54:45	201.568		2024-03-26 23:40:19	8.028		2024-05-21	21:53:56	2024-05-21 21:53:56	208.238		2024-05-21	21:02:19	2024-05-21 21:02:19	0.757
2024-03-26 23:55:15	202.957		2024-03-26 23:40:49	8.32		2024-05-21	21:54:26	2024-05-21 21:54:26	214.784		2024-05-21	21:02:49	2024-05-21 21:02:49	0.723
2024-03-26 23:55:45	200.073		2024-03-26 23:41:19	8.432		2024-05-21	21:54:56	2024-05-21 21:54:56	216.602		2024-05-21	21:03:19	2024-05-21 21:03:19	0.75
2024-03-26 23:56:15	203.005		2024-03-26 23:41:49	8.993		2024-05-21	21:55:26	2024-05-21 21:55:26	218.883		2024-05-21	21:03:49	2024-05-21 21:03:49	0.738
2024-03-26 23:56:45	205.858		2024-03-26 23:42:19	9.677		2024-05-21	21:55:56	2024-05-21 21:55:56	217.648		2024-05-21	21:04:19	2024-05-21 21:04:19	0.74
2024-03-26 23:57:15	205.155		2024-03-26 23:42:49	10.404		2024-05-21	21:56:26	2024-05-21 21:56:26	213.96		2024-05-21	21:04:49	2024-05-21 21:04:49	0.738
2024-03-26 23:57:45	203.332		2024-03-26 23:43:19	10.781		2024-05-21	21:56:56	2024-05-21 21:56:56	214.059		2024-05-21	21:05:19	2024-05-21 21:05:19	0.735
2024-03-26 23:58:15	204.48		2024-03-26 23:43:49	11.222		2024-05-21	21:57:26	2024-05-21 21:57:26	214.259		2024-05-21	21:05:49	2024-05-21 21:05:49	0.745
2024-03-26 23:58:45	205.435		2024-03-26 23:44:19	11.615		2024-05-21	21:57:56	2024-05-21 21:57:56	213.941		2024-05-21	21:06:19	2024-05-21 21:06:19	0.755
2024-03-26 23:59:15	203.993		2024-03-26 23:44:49	11.825		2024-05-21	21:58:26	2024-05-21 21:58:26	212.73		2024-05-21	21:06:49	2024-05-21 21:06:49	0.733
2024-03-26 23:59:45	206.546		2024-03-26 23:45:19	12.007		2024-05-21	21:58:56	2024-05-21 21:58:56	213.986		2024-05-21	21:07:19	2024-05-21 21:07:19	0.775
2024-03-27 00:00:15	206.045		2024-03-26 23:45:49	11.901		2024-05-21	21:59:26	2024-05-21 21:59:26	212.797		2024-05-21	21:07:49	2024-05-21 21:07:49	0.767
2024-03-27 00:00:45	206.081		2024-03-26 23:46:19	11.926		2024-05-21	21:59:56	2024-05-21 21:59:56	209.987		2024-05-21	21:08:19	2024-05-21 21:08:19	0.76
2024-03-27 00:01:15	206.465		2024-03-26 23:46:49	12.691		2024-05-21	22:00:26	2024-05-21 22:00:26	209.533		2024-05-21	21:08:49	2024-05-21 21:08:49	0.743
2024-03-27 00:01:45	206.673		2024-03-26 23:47:19	13.93		2024-05-21	22:00:56	2024-05-21 22:00:56	209.604		2024-05-21	21:09:19	2024-05-21 21:09:19	0.752
2024-03-27 00:02:15	206.141		2024-03-26 23:47:49	14.613		2024-05-21	22:01:26	2024-05-21 22:01:26	216.317		2024-05-21	21:09:49	2024-05-21 21:09:49	0.728
2024-03-27 00:02:45	206.65		2024-03-26 23:48:19	14.69		2024-05-21	22:01:56	2024-05-21 22:01:56	217.88		2024-05-21	21:10:19	2024-05-21 21:10:19	0.745
2024-03-27 00:03:15	207.05		2024-03-26 23:48:49	14.396		2024-05-21	22:02:26	2024-05-21 22:02:26	216.982		2024-05-21	21:10:49	2024-05-21 21:10:49	0.757
2024-03-27 00:03:45	207.913		2024-03-26 23:49:19	14.019		2024-05-21	22:02:56	2024-05-21 22:02:56	217.798		2024-05-21	21:11:19	2024-05-21 21:11:19	0.743
2024-03-27 00:04:15	203.323		2024-03-26 23:49:49	13.933		2024-05-21	22:03:26	2024-05-21 22:03:26	219.066		2024-05-21	21:11:49	2024-05-21 21:11:49	0.752
2024-03-27 00:04:45	206.258		2024-03-26 23:50:19	12.918		2024-05-21	22:03:56	2024-05-21 22:03:56	218.338		2024-05-21	21:12:19	2024-05-21 21:12:19	0.748
2024-03-27 00:05:15	205.697		2024-03-26 23:50:49	12.923		2024-05-21	22:04:26	2024-05-21 22:04:26	218.235		2024-05-21	21:12:49	2024-05-21 21:12:49	0.733
2024-03-27 00:05:45	207.568		2024-03-26 23:51:19	13.208		2024-05-21	22:04:56	2024-05-21 22:04:56	218.624		2024-05-21	21:13:19	2024-05-21 21:13:19	0.743
2024-03-27 00:06:15	207.545		2024-03-26 23:51:49	12.875		2024-05-21	22:05:26	2024-05-21 22:05:26	216.542		2024-05-21	21:13:49	2024-05-21 21:13:49	0.738
2024-03-27 00:06:45	206.937		2024-03-26 23:52:19	11.946		2024-05-21	22:05:56	2024-05-21 22:05:56	215.773		2024-05-21	21:14:19	2024-05-21 21:14:19	0.743
2024-03-27 00:07:15	206.621		2024-03-26 23:52:49	10.765		2024-05-21	22:06:26	2024-05-21 22:06:26	215.232		2024-05-21	21:14:49	2024-05-21 21:14:49	0.74
2024-03-27 00:07:45	205.805		2024-03-26 23:53:19	10.737		2024-05-21	22:06:56	2024-05-21 22:06:56	218.307		2024-05-21	21:15:19	2024-05-21 21:15:19	0.745
2024-03-27 00:08:15	207.872		2024-03-26 23:53:49	10.605		2024-05-21	22:07:26	2024-05-21 22:07:26	215.99		2024-05-21	21:15:49	2024-05-21 21:15:49	0.765
2024-03-27 00:08:45	207.366		2024-03-26 23:54:19	10.126		2024-05-21	22:07:56	2024-05-21 22:07:56	214.862		2024-05-21	21:16:19	2024-05-21 21:16:19	0.765
2024-03-27 00:09:15	208.224		2024-03-26 23:54:49	8.88		2024-05-21	22:08:26	2024-05-21 22:08:26	214.289		2024-05-21	21:16:49	2024-05-21 21:16:49	0.765
2024-03-27 00:09:45	207.341		2024-03-26 23:55:19	9.055		2024-05-21	22:08:56	2024-05-21 22:08:56	214.164		2024-05-21	21:17:19	2024-05-21 21:17:19	0.755
2024-03-27 00:10:15	207.851		2024-03-26 23:55:49	9.602		2024-05-21	22:09:26	2024-05-21 22:09:26	215.143		2024-05-21	21:17:49	2024-05-21 21:17:49	0.745
2024-03-27 00:10:45	207.386		2024-03-26 23:56:19	10.015		2024-05-21	22:09:56	2024-05-21 22:09:56	216.115		2024-05-21	21:18:19	2024-05-21 21:18:19	0.735
2024-03-27 00:11:15	207.156		2024-03-26 23:56:49	10.588		2024-05-21	22:10:26	2024-05-21 22:10:26	215.503		2024-05-21	21:18:49	2024-05-21 21:18:49	0.733
2024-03-27 00:11:45	206.77		2024-03-26 23:57:19	11.393		2024-05-21	22:10:56	2024-05-21 22:10:56	213.604		2024-05-21	21:19:19	2024-05-21 21:19:19	0.76
2024-03-27 00:12:15	206.937		2024-03-26 23:57:49	11.374		2024-05-21	22:11:26	2024-05-21 22:11:26	213.42		2024-05-21	21:19:49	2024-05-21 21:19:49	0.767
2024-03-27 00:12:45	206.682		2024-03-26 23:58:19	11.115		2024-05-21	22:11:56	2024-05-21 22:11:56	213.166		2024-05-21	21:20:19	2024-05-21 21:20:19	0.772
2024-03-27 00:13:15	206.576		2024-03-26 23:58:49	10.767		2024-05-21	22:12:26	2024-05-21 22:12:26	213.083		2024-05-21	21:20:49	2024-05-21 21:20:49	0.743
2024-03-27 00:13:45	207.726		2024-03-26 23:59:19	9.977		2024-05-21	22:12:56	2024-05-21 22:12:56	214.333		2024-05-21	21:21:19	2024-05-21 21:21:19	0.767
2024-03-27 00:14:15	207.482		2024-03-26 23:59:49	9.153		2024-05-21	22:13:26	2024-05-21 22:13:26	213.499		2024-05-21	21:21:49	2024-05-21 21:21:49	0.735
2024-03-27 00:14:45	207.416		2024-03-27 00:00:19	8.495		2024-05-21	22:13:56	2024-05-21 22:13:56	212.556		2024-05-21	21:22:19	2024-05-21 21:22:19	0.745
2024-03-27 00:15:15	206.097		2024-03-27 00:00:49	7.899		2024-05-21	22:14:26	2024-05-21 22:14:26	212.141		2024-05-21	21:22:49	2024-05-21 21:22:49	0.743
2024-03-27 00:15:45	206.49		2024-03-27 00:01:19	7.317		2024-05-21	22:14:56	2024-05-21 22:14:56	211.747		2024-05-21	21:23:19	2024-05-21 21:23:19	0.75
2024-03-27 00:16:15	206.623		2024-03-27 00:01:49	6.727		2024-05-21	22:15:26	2024-05-21 22:15:26	209.962		2024-05-21	21:23:49	2024-05-21 21:23:49	0.738
2024-03-27 00:16:45	206.108		2024-03-27 00:02:19	6.02		2024-05-21	22:15:56	2024-05-21 22:15:56	207.455		2024-05-21	21:24:19	2024-05-21 21:24:19	0.742
2024-03-27 00:17:15	204.741		2024-03-27 00:02:49	5.624		2024-05-21	22:16:26	2024-05-21 22:16:26	205.912		2024-05-21	21:24:49	2024-05-21 21:24:49	0.77
2024-03-27 00:17:45	205.391		2024-03-27 00:03:19	5.44		2024-05-21	22:16:56	2024-05-21 22:16:56	205.686		2024-05-21	21:25:19	2024-05-21 21:25:19	0.753
2024-03-27 00:18:15	205.429		2024-03-27 00:03:49	5.322		2024-05-21	22:17:26	2024-05-21 22:17:26	204.943		2024-05-21	21:25:49	2024-05-21 21:25:49	0.758
2024-03-27 00:18:45	206.297		2024-03-27 00:04:19	4.962		2024-05-21	22:17:56	2024-05-21 22:17:56	203.423		2024-05-21	21:26:19	2024-05-21 21:26:19	0.718
2024-03-27 00:19:15	206.252		2024-03-27 00:04:49	4.63		2024-05-21	22:18:26	2024-05-21 22:18:26	201.865		2024-05-21	21:26:49	2024-05-21 21:26:49	0.75
2024-03-27 00:19:45	206.641		2024-03-27 00:05:19	4.427		2024-05-21	22:18:56	2024-05-21 22:18:56	203.243		2024-05-21	21:27:19	2024-05-21 21:27:19	0.752
2024-03-27 00:20:15	205.857		2024-03-27 00:05:49	4.032		2024-05-21	22:19:26	2024-05-21 22:19:26	204.793		2024-05-21	21:27:49	2024-05-21 21:27:49	0.748
2024-03-27 00:20:45	206.441		2024-03-27 00:06:19	3.695		2024-05-21	22:19:56	2024-05-21 22:19:56	205.263		2024-05-21	21:28:19	2024-05-21 21:28:19	0.733
2024-03-27 00:21:15	206.688		2024-03-27 00:06:49	3.562		2024-05-21	22:20:26	2024-05-21 22:20:26	204.63		2024-05-21	21:28:49	2024-05-21 21:28:49	0.753
2024-03-27 00:21:45	208.115		2024-03-27 00:07:19	3.424		2024-05-21	22:20:56	2024-05-21 22:20:56	203.225		2024-05-21	21:29:19	2024-05-21 21:29:19	0.745
2024-03-27 00:22:15	207.581		2024-03-27 00:07:49	3.503		2024-05-21	22:21:26	2024-05-21 22:21:26	202.162		2024-05-21	21:29:49	2024-05-21 21:29:49	0.748
2024-03-27 00:22:45	206.794		2024-03-27 00:08:19	3.442		2024-05-21	22:21:56	2024-05-21 22:21:56	205.493		2024-05-21	21:30:19	2024-05-21 21:30:19	0.75
2024-03-27 00:23:15	207.353		2024-03-27 00:08:49	3.205		2024-05-21	22:22:26	2024-05-21 22:22:26	208.186		2024-05-21	21:30:49	2024-05-21 21:30:49	0.76
2024-03-27 00:23:45	205.735		2024-03-27 00:09:19	2.799		2024-05-21	22:22:56	2024-05-21 22:22:56	208.803		2024-05-21	21:31:19	2024-05-21 21:31:19	0.733
2024-03-27 00:24:15	203.002		2024-03-27 00:09:49	2.595		2024-05-21	22:23:26	2024-05-21 22:23:26	206.632		2024-05-21	21:31:49	2024-05-21 21:31:49	0.755
2024-03-27 00:24:45	206.295		2024-03-27 00:10:19	2.489		2024-05-21	22:23:56	2024-05-21 22:23:56	206.194		2024-05-21	21:32:19	2024-05-21 21:32:19	0.755
2024-03-27 00:25:15	207.104		2024-03-27 00:10:49	2.413		2024-05-21	22:24:26	2024-05-21 22:24:26	208.133		2024-05-21	21:32:49	2024-05-21 21:32:49	0.765
2024-03-27 00:25:45	207.475		2024-03-27 00:11:19	2.56		2024-05-21	22:24:56	2024-05-21 22:24:56	211.344		2024-05-21	21:33:19	2024-05-21 21:33:19	0.75
2024-03-27 00:26:15	207.57		2024-03-27 00:11:49	2.733		2024-05-21	22:25:26	2024-05-21 22:25:26	210.167		2024-05-21	21:33:49	2024-05-21 21:33:49	0.748
2024-03-27 00:26:45	207.371		2024-03-27 00:12:19	3.126		2024-05-21	22:25:56	2024-05-21 22:25:56	210.067		2024-05-21	21:34:19	2024-05-21 21:34:19	0.753
2024-03-27 00:27:15	207.224		2024-03-27 00:12:49	3.452		2024-05-21	22:26:26	2024-05-21 22:26:26	209.277		2024-05-21	21:34:49	2024-05-21 21:34:49	0.726
2024-03-27 00:27:45	206.625		2024-03-27 00:13:19	3.366		2024-05-21	22:26:56	2024-05-21 22:26:56	210.036		2024-05-21	21:35:19	2024-05-21 21:35:19	0.76
2024-03-27 00:28:15	206.643		2024-03-27 00:13:49	3.284		2024-05-21	22:27:26	2024-05-21 22:27:26	211.465		2024-05-21	21:35:49	2024-05-21 21:35:49	0.76
2024-03-27 00:28:45	206.441		2024-03-27 00:14:19	3.244		2024-05-21	22:27:56	2024-05-21 22:27:56	213.12		2024-05-21	21:36:19	2024-05-21 21:36:19	0.762
2024-03-27 00:29:15	205.255		2024-03-27 00:14:49	2.99		2024-05-21	22:28:26	2024-05-21 22:28:26	212.957		2024-05-21	21:36:49	2024-05-21 21:36:49	0.74
2024-03-27 00:29:45	208.224		2024-03-27 00:15:19	2.761		2024-05-21	22:28:56	2024-05-21 22:28:56	212.658		2024-05-21	21:37:19	2024-05-21 21:37:19	0.752
2024-03-27 00:30:15	200.114		2024-03-27 00:15:49	2.532		2024-05-21	22:29:26	2024-05-21 22:29:26	213.282		2024-05-21	21:37:49	2024-05-21 21:37:49	0.784
2024-03-27 00:30:45	203.454		2024-03-27 00:16:19	2.377		2024-05-21	22:29:56	2024-05-21 22:29:56	213.605		2024-05-21	21:38:19	2024-05-21 21:38:19	0.735
2024-03-27 00:31:15	204.035		2024-03-27 00:16:49	2.286		2024-05-21	22:30:26	2024-05-21 22:30:26	212.65		2024-05-21	21:38:49	2024-05-21 21:38:49	0.78
2024-03-27 00:31:45	207.359		2024-03-27 00:17:19	2.179		2024-05-21	22:30:56	2024-05-21 22:30:56	214.69		2024-05-21	21:39:19	2024-05-21 21:39:19	0.774
2024-03-27 00:32:15	206.135		2024-03-27 00:17:49	2.177		2024-05-21	22:31:26	2024-05-21 22:31:26	217.019		2024-05-21	21:39:49	2024-05-21 21:39:49	0.745
2024-03-27 00:32:45	206.434		2024-03-27 00:18:19	2.443		2024-05-21	22:31:56	2024-05-21 22:31:56	216.629		2024-05-21	21:40:19	2024-05-21 21:40:19	0.757
2024-03-27 00:33:15	205.812		2024-03-27 00:18:49	2.938		2024-05-21	22:32:26	2024-05-21 22:32:26	216.8		2024-05-21	21:40:49	2024-05-21 21:40:49	0.757
2024-03-27 00:33:45	206.738		2024-03-27 00:19:19	2.782		2024-05-21	22:32:56	2024-05-21 22:32:56	216.573		2024-05-21	21:41:19	2024-05-21 21:41:19	0.735
2024-03-27 00:34:15	207.536		2024-03-27 00:19:49	2.495		2024-05-21	22:33:26	2024-05-21 22:33:26	215.938		2024-05-21	21:41:49	2024-05-21 21:41:49	0.755
2024-03-27 00:34:45	206.508		2024-03-27 00:20:19	2.411		2024-05-21	22:33:56	2024-05-21 22:33:56	217.334		2024-05-21	21:42:19	2024-05-21 21:42:19	0.735
2024-03-27 00:35:15	205.467		2024-03-27 00:20:49	2.551		2024-05-21	22:34:26	2024-05-21 22:34:26	219.03		2024-05-21	21:42:49	2024-05-21 21:42:49	0.75
2024-03-27 00:35:45	205.331		2024-03-27 00:21:19	2.527		2024-05-21	22:34:56	2024-05-21 22:34:56	218.481		2024-05-21	21:43:19	2024-05-21 21:43:19	0.767
2024-03-27 00:36:15	205.069		2024-03-27 00:21:49	2.099		2024-05-21	22:35:26	2024-05-21 22:35:26	217.723		2024-05-21	21:43:49	2024-05-21 21:43:49	0.765
2024-03-27 00:36:45	204.121		2024-03-27 00:22:19	2.062		2024-05-21	22:35:56	2024-05-21 22:35:56	217.839		2024-05-21	21:44:19	2024-05-21 21:44:19	0.745
2024-03-27 00:37:15	204.166		2024-03-27 00:22:49	2.287		2024-05-21	22:36:26	2024-05-21 22:36:26	217.818		2024-05-21	21:44:49	2024-05-21 21:44:49	0.76
2024-03-27 00:37:45	205.55		2024-03-27 00:23:19	3.015		2024-05-21	22:36:56	2024-05-21 22:36:56	217.052		2024-05-21	21:45:19	2024-05-21 21:45:19	0.752
2024-03-27 00:38:15	204.902		2024-03-27 00:23:49	3.498		2024-05-21	22:37:26	2024-05-21 22:37:26	216.873		2024-05-21	21:45:49	2024-05-21 21:45:49	0.762
2024-03-27 00:38:45	206.279		2024-03-27 00:24:19	3.907		2024-05-21	22:37:56	2024-05-21 22:37:56	216.36		2024-05-21	21:46:19	2024-05-21 21:46:19	0.75
2024-03-27 00:39:15	198.776		2024-03-27 00:24:49	3.297		2024-05-21	22:38:26	2024-05-21 22:38:26	214.172		2024-05-21	21:46:49	2024-05-21 21:46:49	0.745
2024-03-27 00:39:45	193.595		2024-03-27 00:25:19	3.401		2024-05-21	22:38:56	2024-05-21 22:38:56	214.239		2024-05-21	21:47:19	2024-05-21 21:47:19	0.755
2024-03-27 00:40:15	202.903		2024-03-27 00:25:49	3.301		2024-05-21	22:39:26	2024-05-21 22:39:26	214.255		2024-05-21	21:47:49	2024-05-21 21:47:49	0.772
2024-03-27 00:40:45	201.57		2024-03-27 00:26:19	3.37		2024-05-21	22:39:56	2024-05-21 22:39:56	213.111		2024-05-21	21:48:19	2024-05-21 21:48:19	0.745
2024-03-27 00:41:15	205.646		2024-03-27 00:26:49	4.364		2024-05-21	22:40:26	2024-05-21 22:40:26	206.798		2024-05-21	21:48:49	2024-05-21 21:48:49	0.75
2024-03-27 00:41:45	205.666		2024-03-27 00:27:19	3.065		2024-05-21	22:40:56	2024-05-21 22:40:56	208.126		2024-05-21	21:49:19	2024-05-21 21:49:19	0.757
2024-03-27 00:42:15	207.867		2024-03-27 00:27:49	2.538		2024-05-21	22:41:26	2024-05-21 22:41:26	211.36		2024-05-21	21:49:49	2024-05-21 21:49:49	0.772
2024-03-27 00:42:45	206.292		2024-03-27 00:28:19	2.397		2024-05-21	22:41:56	2024-05-21 22:41:56	212.863		2024-05-21	21:50:19	2024-05-21 21:50:19	0.743
2024-03-27 00:43:15	206.686		2024-03-27 00:28:49	2.323		2024-05-21	22:42:26	2024-05-21 22:42:26	213.504		2024-05-21	21:50:49	2024-05-21 21:50:49	0.75
2024-03-27 00:43:45	206.119		2024-03-27 00:29:19	2.034		2024-05-21	22:42:56	2024-05-21 22:42:56	213.942		2024-05-21	21:51:19	2024-05-21 21:51:19	0.738
2024-03-27 00:44:15	207.264		2024-03-27 00:29:49	2.47		2024-05-21	22:43:26	2024-05-21 22:43:26	214.671		2024-05-21	21:51:49	2024-05-21 21:51:49	0.757
2024-03-27 00:44:45	206.472		2024-03-27 00:30:19	4.312		2024-05-21	22:43:56	2024-05-21 22:43:56	214.405		2024-05-21	21:52:19	2024-05-21 21:52:19	0.78
2024-03-27 00:45:15	206.448		2024-03-27 00:30:49	4.955		2024-05-21	22:44:26	2024-05-21 22:44:26	214.32		2024-05-21	21:52:49	2024-05-21 21:52:49	0.75
2024-03-27 00:45:45	204.37		2024-03-27 00:31:19	3.885		2024-05-21	22:44:56	2024-05-21 22:44:56	215.233		2024-05-21	21:53:19	2024-05-21 21:53:19	0.752
2024-03-27 00:46:15	204.13		2024-03-27 00:31:49	4.202		2024-05-21	22:45:26	2024-05-21 22:45:26	214.645		2024-05-21	21:53:49	2024-05-21 21:53:49	0.76
2024-03-27 00:46:45	203.318		2024-03-27 00:32:19	3.831		2024-05-21	22:45:56	2024-05-21 22:45:56	213.807		2024-05-21	21:54:19	2024-05-21 21:54:19	0.75
2024-03-27 00:47:15	206.889		2024-03-27 00:32:49	3.107		2024-05-21	22:46:26	2024-05-21 22:46:26	214.67		2024-05-21	21:54:49	2024-05-21 21:54:49	0.782
2024-03-27 00:47:45	205.893		2024-03-27 00:33:19	2.436		2024-05-21	22:46:56	2024-05-21 22:46:56	214.1		2024-05-21	21:55:19	2024-05-21 21:55:19	0.757
2024-03-27 00:48:15	203.778		2024-03-27 00:33:49	2.063		2024-05-21	22:47:26	2024-05-21 22:47:26	212.833		2024-05-21	21:55:49	2024-05-21 21:55:49	0.769
2024-03-27 00:48:45	205.949		2024-03-27 00:34:19	1.99		2024-05-21	22:47:56	2024-05-21 22:47:56	212.467		2024-05-21	21:56:19	2024-05-21 21:56:19	0.762
2024-03-27 00:49:15	203.986		2024-03-27 00:34:49	2.021		2024-05-21	22:48:26	2024-05-21 22:48:26	212.231		2024-05-21	21:56:49	2024-05-21 21:56:49	0.762
2024-03-27 00:49:45	203.926		2024-03-27 00:35:19	1.985		2024-05-21	22:48:56	2024-05-21 22:48:56	212.501		2024-05-21	21:57:19	2024-05-21 21:57:19	0.762
2024-03-27 00:50:15	204.27		2024-03-27 00:35:49	1.899		2024-05-21	22:49:26	2024-05-21 22:49:26	212.094		2024-05-21	21:57:49	2024-05-21 21:57:49	0.762
2024-03-27 00:50:45	205.505		2024-03-27 00:36:19	1.891		2024-05-21	22:49:56	2024-05-21 22:49:56	209.789		2024-05-21	21:58:19	2024-05-21 21:58:19	0.757
2024-03-27 00:51:15	206.297		2024-03-27 00:36:49	1.782		2024-05-21	22:50:26	2024-05-21 22:50:26	210.124		2024-05-21	21:58:49	2024-05-21 21:58:49	0.759
2024-03-27 00:51:45	206.484		2024-03-27 00:37:19	1.658		2024-05-21	22:50:56	2024-05-21 22:50:56	210.678		2024-05-21	21:59:19	2024-05-21 21:59:19	0.754
2024-03-27 00:52:15	204.406		2024-03-27 00:37:49	1.642		2024-05-21	22:51:26	2024-05-21 22:51:26	210.02		2024-05-21	21:59:49	2024-05-21 21:59:49	0.762
2024-03-27 00:52:45	205.083		2024-03-27 00:38:19	1.691		2024-05-21	22:51:56	2024-05-21 22:51:56	207.285		2024-05-21	22:00:19	2024-05-21 22:00:19	0.762
2024-03-27 00:53:15	205.147		2024-03-27 00:38:49	1.691		2024-05-21	22:52:26	2024-05-21 22:52:26	207.251		2024-05-21	22:00:49	2024-05-21 22:00:49	0.747
2024-03-27 00:53:45	205.51		2024-03-27 00:39:19	1.733		2024-05-21	22:52:56	2024-05-21 22:52:56	207.759		2024-05-21	22:01:19	2024-05-21 22:01:19	0.752
2024-03-27 00:54:15	204.857		2024-03-27 00:39:49	1.684		2024-05-21	22:53:26	2024-05-21 22:53:26	206.338		2024-05-21	22:01:49	2024-05-21 22:01:49	0.767
2024-03-27 00:54:45	204.969		2024-03-27 00:40:19	1.564		2024-05-21	22:53:56	2024-05-21 22:53:56	204.216		2024-05-21	22:02:19	2024-05-21 22:02:19	0.757
2024-03-27 00:55:15	205.011		2024-03-27 00:40:49	1.559		2024-05-21	22:54:26	2024-05-21 22:54:26	203.995		2024-05-21	22:02:49	2024-05-21 22:02:49	0.767
2024-03-27 00:55:45	205.487		2024-03-27 00:41:19	1.536		2024-05-21	22:54:56	2024-05-21 22:54:56	204.351		2024-05-21	22:03:19	2024-05-21 22:03:19	0.76
2024-03-27 00:56:15	205.13		2024-03-27 00:41:49	1.549		2024-05-21	22:55:26	2024-05-21 22:55:26	203.369		2024-05-21	22:03:49	2024-05-21 22:03:49	0.764
2024-03-27 00:56:45	203.51		2024-03-27 00:42:19	1.663		2024-05-21	22:55:56	2024-05-21 22:55:56	205.908		2024-05-21	22:04:19	2024-05-21 22:04:19	0.762
2024-03-27 00:57:15	203.137		2024-03-27 00:42:49	1.878		2024-05-21	22:56:26	2024-05-21 22:56:26	206.118		2024-05-21	22:04:49	2024-05-21 22:04:49	0.772
2024-03-27 00:57:45	203.857		2024-03-27 00:43:19	2.326		2024-05-21	22:56:56	2024-05-21 22:56:56	206.361		2024-05-21	22:05:19	2024-05-21 22:05:19	0.767
2024-03-27 00:58:15	204.726		2024-03-27 00:43:49	2.206		2024-05-21	22:57:26	2024-05-21 22:57:26	207.816		2024-05-21	22:05:49	2024-05-21 22:05:49	0.765
2024-03-27 00:58:45	204.483		2024-03-27 00:44:19	2.034		2024-05-21	22:57:56	2024-05-21 22:57:56	207.788		2024-05-21	22:06:19	2024-05-21 22:06:19	0.76
2024-03-27 00:59:15	205.206		2024-03-27 00:44:49	1.977		2024-05-21	22:58:26	2024-05-21 22:58:26	202.772		2024-05-21	22:06:49	2024-05-21 22:06:49	0.767
2024-03-27 00:59:45	204.172		2024-03-27 00:45:19	1.886		2024-05-21	22:58:56	2024-05-21 22:58:56	200.315		2024-05-21	22:07:19	2024-05-21 22:07:19	0.765
2024-03-27 01:00:15	204.024		2024-03-27 00:45:49	1.829		2024-05-21	22:59:26	2024-05-21 22:59:26	198.959		2024-05-21	22:07:49	2024-05-21 22:07:49	0.76
2024-03-27 01:00:45	204.079		2024-03-27 00:46:19	1.78		2024-05-21	22:59:56	2024-05-21 22:59:56	196.69		2024-05-21	22:08:19	2024-05-21 22:08:19	0.777
2024-03-27 01:01:15	204.528		2024-03-27 00:46:49	1.762		2024-05-21	23:00:26	2024-05-21 23:00:26	198.441		2024-05-21	22:08:49	2024-05-21 22:08:49	0.762
2024-03-27 01:01:45	205.501		2024-03-27 00:47:19	1.842		2024-05-21	23:00:56	2024-05-21 23:00:56	200.234		2024-05-21	22:09:19	2024-05-21 22:09:19	0.762
2024-03-27 01:02:15	204.555		2024-03-27 00:47:49	1.974		2024-05-21	23:01:26	2024-05-21 23:01:26	201.95		2024-05-21	22:09:49	2024-05-21 22:09:49	0.782
2024-03-27 01:02:45	204.742		2024-03-27 00:48:19	1.943		2024-05-21	23:01:56	2024-05-21 23:01:56	201.07		2024-05-21	22:10:19	2024-05-21 22:10:19	0.769
2024-03-27 01:03:15	204.492		2024-03-27 00:48:49	1.86		2024-05-21	23:02:26	2024-05-21 23:02:26	200.418		2024-05-21	22:10:49	2024-05-21 22:10:49	0.757
2024-03-27 01:03:45	204.361		2024-03-27 00:49:19	1.702		2024-05-21	23:02:56	2024-05-21 23:02:56	200.817		2024-05-21	22:11:19	2024-05-21 22:11:19	0.767
2024-03-27 01:04:15	204.077		2024-03-27 00:49:49	1.549		2024-05-21	23:03:26	2024-05-21 23:03:26	201.193		2024-05-21	22:11:49	2024-05-21 22:11:49	0.774
2024-03-27 01:04:45	203.042		2024-03-27 00:50:19	1.42		2024-05-21	23:03:56	2024-05-21 23:03:56	202.578		2024-05-21	22:12:19	2024-05-21 22:12:19	0.75
2024-03-27 01:05:15	201.611		2024-03-27 00:50:49	1.315		2024-05-21	23:04:26	2024-05-21 23:04:26	202.781		2024-05-21	22:12:49	2024-05-21 22:12:49	0.784
2024-03-27 01:05:45	200.807		2024-03-27 00:51:19	1.209		2024-05-21	23:04:56	2024-05-21 23:04:56	202.912		2024-05-21	22:13:19	2024-05-21 22:13:19	0.755
2024-03-27 01:06:15	201.661		2024-03-27 00:51:49	1.117		2024-05-21	23:05:26	2024-05-21 23:05:26	202.847		2024-05-21	22:13:49	2024-05-21 22:13:49	0.77
2024-03-27 01:06:45	205.772		2024-03-27 00:52:19	0.986		2024-05-21	23:05:56	2024-05-21 23:05:56	202.792		2024-05-21	22:14:19	2024-05-21 22:14:19	0.74
2024-03-27 01:07:15	205.157		2024-03-27 00:52:49	0.968		2024-05-21	23:06:26	2024-05-21 23:06:26	202.214		2024-05-21	22:14:49	2024-05-21 22:14:49	0.759
2024-03-27 01:07:45	207.418		2024-03-27 00:53:19	1.012		2024-05-21	23:06:56	2024-05-21 23:06:56	202.245		2024-05-21	22:15:19	2024-05-21 22:15:19	0.762
2024-03-27 01:08:15	205.534		2024-03-27 00:53:49	1.163		2024-05-21	23:07:26	2024-05-21 23:07:26	202.086		2024-05-21	22:15:49	2024-05-21 22:15:49	0.764
2024-03-27 01:08:45	204.837		2024-03-27 00:54:19	1.323		2024-05-21	23:07:56	2024-05-21 23:07:56	202.641		2024-05-21	22:16:19	2024-05-21 22:16:19	0.754
2024-03-27 01:09:15	206.729		2024-03-27 00:54:49	1.371		2024-05-21	23:08:26	2024-05-21 23:08:26	203.723		2024-05-21	22:16:49	2024-05-21 22:16:49	0.761
2024-03-27 01:09:45	204.61		2024-03-27 00:55:19	1.289		2024-05-21	23:08:56	2024-05-21 23:08:56	203.598		2024-05-21	22:17:19	2024-05-21 22:17:19	0.774
2024-03-27 01:10:15	206.149		2024-03-27 00:55:49	1.271		2024-05-21	23:09:26	2024-05-21 23:09:26	204.215		2024-05-21	22:17:49	2024-05-21 22:17:49	0.771
2024-03-27 01:10:45	204.702		2024-03-27 00:56:19	1.282		2024-05-21	23:09:56	2024-05-21 23:09:56	204.639		2024-05-21	22:18:19	2024-05-21 22:18:19	0.751
2024-03-27 01:11:15	205.534		2024-03-27 00:56:49	1.299		2024-05-21	23:10:26	2024-05-21 23:10:26	204.896		2024-05-21	22:18:49	2024-05-21 22:18:49	0.751
2024-03-27 01:11:45	206.18		2024-03-27 00:57:19	1.276		2024-05-21	23:10:56	2024-05-21 23:10:56	204.327		2024-05-21	22:19:19	2024-05-21 22:19:19	0.78
2024-03-27 01:12:15	205.136		2024-03-27 00:57:49	1.32		2024-05-21	23:11:26	2024-05-21 23:11:26	203.95		2024-05-21	22:19:49	2024-05-21 22:19:49	0.761
2024-03-27 01:12:45	205.092		2024-03-27 00:58:19	1.323		2024-05-21	23:11:56	2024-05-21 23:11:56	203.574		2024-05-21	22:20:19	2024-05-21 22:20:19	0.768
2024-03-27 01:13:15	203.847		2024-03-27 00:58:49	1.346		2024-05-21	23:12:26	2024-05-21 23:12:26	202.834		2024-05-21	22:20:49	2024-05-21 22:20:49	0.77
2024-03-27 01:13:45	204.601		2024-03-27 00:59:19	1.451		2024-05-21	23:12:56	2024-05-21 23:12:56	201.373		2024-05-21	22:21:19	2024-05-21 22:21:19	0.763
2024-03-27 01:14:15	206.853		2024-03-27 00:59:49	1.511		2024-05-21	23:13:26	2024-05-21 23:13:26	200.429		2024-05-21	22:21:49	2024-05-21 22:21:49	0.761
2024-03-27 01:14:45	206.428		2024-03-27 01:00:19	1.534		2024-05-21	23:13:56	2024-05-21 23:13:56	199.845		2024-05-21	22:22:19	2024-05-21 22:22:19	0.763
2024-03-27 01:15:15	206.164		2024-03-27 01:00:49	1.578		2024-05-21	23:14:26	2024-05-21 23:14:26	198.937		2024-05-21	22:22:49	2024-05-21 22:22:49	0.783
2024-03-27 01:15:45	204.771		2024-03-27 01:01:19	1.59		2024-05-21	23:14:56	2024-05-21 23:14:56	198.383		2024-05-21	22:23:19	2024-05-21 22:23:19	0.758
2024-03-27 01:16:15	204.67		2024-03-27 01:01:49	1.554		2024-05-21	23:15:26	2024-05-21 23:15:26	197.922		2024-05-21	22:23:49	2024-05-21 22:23:49	0.775
2024-03-27 01:16:45	205.241		2024-03-27 01:02:19	1.464		2024-05-21	23:15:56	2024-05-21 23:15:56	197.228		2024-05-21	22:24:19	2024-05-21 22:24:19	0.775
2024-03-27 01:17:15	205.434		2024-03-27 01:02:49	1.526		2024-05-21	23:16:26	2024-05-21 23:16:26	196.584		2024-05-21	22:24:49	2024-05-21 22:24:49	0.768
2024-03-27 01:17:45	203.709		2024-03-27 01:03:19	1.596		2024-05-21	23:16:56	2024-05-21 23:16:56	195.665		2024-05-21	22:25:19	2024-05-21 22:25:19	0.75
2024-03-27 01:18:15	205.203		2024-03-27 01:03:49	1.49		2024-05-21	23:17:26	2024-05-21 23:17:26	192.036		2024-05-21	22:25:49	2024-05-21 22:25:49	0.755
2024-03-27 01:18:45	203.28		2024-03-27 01:04:19	1.402		2024-05-21	23:17:56	2024-05-21 23:17:56	191.546		2024-05-21	22:26:19	2024-05-21 22:26:19	0.758
2024-03-27 01:19:15	200.063		2024-03-27 01:04:49	1.614		2024-05-21	23:18:26	2024-05-21 23:18:26	193.479		2024-05-21	22:26:49	2024-05-21 22:26:49	0.755
2024-03-27 01:19:45	201.845		2024-03-27 01:05:19	1.744		2024-05-21	23:18:56	2024-05-21 23:18:56	193.795		2024-05-21	22:27:19	2024-05-21 22:27:19	0.76
2024-03-27 01:20:15	204.646		2024-03-27 01:05:49	1.687		2024-05-21	23:19:26	2024-05-21 23:19:26	193.62		2024-05-21	22:27:49	2024-05-21 22:27:49	0.767
2024-03-27 01:20:45	203.095		2024-03-27 01:06:19	1.573		2024-05-21	23:19:56	2024-05-21 23:19:56	192.697		2024-05-21	22:28:19	2024-05-21 22:28:19	0.762
2024-03-27 01:21:15	204.951		2024-03-27 01:06:49	1.588		2024-05-21	23:20:26	2024-05-21 23:20:26	191.401		2024-05-21	22:28:49	2024-05-21 22:28:49	0.75
2024-03-27 01:21:45	203.906		2024-03-27 01:07:19	1.62		2024-05-21	23:20:56	2024-05-21 23:20:56	189.007		2024-05-21	22:29:19	2024-05-21 22:29:19	0.782
2024-03-27 01:22:15	203.23		2024-03-27 01:07:49	1.617		2024-05-21	23:21:26	2024-05-21 23:21:26	189.932		2024-05-21	22:29:49	2024-05-21 22:29:49	0.748
2024-03-27 01:22:45	203.922		2024-03-27 01:08:19	1.503		2024-05-21	23:21:56	2024-05-21 23:21:56	189.013		2024-05-21	22:30:19	2024-05-21 22:30:19	0.77
2024-03-27 01:23:15	202.998		2024-03-27 01:08:49	1.416		2024-05-21	23:22:26	2024-05-21 23:22:26	187.206		2024-05-21	22:30:49	2024-05-21 22:30:49	0.765
2024-03-27 01:23:45	205.257		2024-03-27 01:09:19	1.421		2024-05-21	23:22:56	2024-05-21 23:22:56	185.761		2024-05-21	22:31:19	2024-05-21 22:31:19	0.755
2024-03-27 01:24:15	207.708		2024-03-27 01:09:49	1.403		2024-05-21	23:23:26	2024-05-21 23:23:26	183.136		2024-05-21	22:31:49	2024-05-21 22:31:49	0.748
2024-03-27 01:24:45	205.503		2024-03-27 01:10:19	1.315		2024-05-21	23:23:56	2024-05-21 23:23:56	183.378		2024-05-21	22:32:19	2024-05-21 22:32:19	0.782
2024-03-27 01:25:15	206.205		2024-03-27 01:10:49	1.171		2024-05-21	23:24:26	2024-05-21 23:24:26	183.573		2024-05-21	22:32:49	2024-05-21 22:32:49	0.758
2024-03-27 01:25:45	205.203		2024-03-27 01:11:19	1.059		2024-05-21	23:24:56	2024-05-21 23:24:56	183.115		2024-05-21	22:33:19	2024-05-21 22:33:19	0.777
2024-03-27 01:26:15	205.25		2024-03-27 01:11:49	1.061		2024-05-21	23:25:26	2024-05-21 23:25:26	182.304		2024-05-21	22:33:49	2024-05-21 22:33:49	0.77
2024-03-27 01:26:45	207.733		2024-03-27 01:12:19	0.984		2024-05-21	23:25:56	2024-05-21 23:25:56	182.665		2024-05-21	22:34:19	2024-05-21 22:34:19	0.755
2024-03-27 01:27:15	204.866		2024-03-27 01:12:49	0.902		2024-05-21	23:26:26	2024-05-21 23:26:26	183.582		2024-05-21	22:34:49	2024-05-21 22:34:49	0.76
2024-03-27 01:27:45	204.237		2024-03-27 01:13:19	0.856		2024-05-21	23:26:56	2024-05-21 23:26:56	184.262		2024-05-21	22:35:19	2024-05-21 22:35:19	0.772
2024-03-27 01:28:15	202.057		2024-03-27 01:13:49	0.795		2024-05-21	23:27:26	2024-05-21 23:27:26	184.327		2024-05-21	22:35:49	2024-05-21 22:35:49	0.789
2024-03-27 01:28:45	203.986		2024-03-27 01:14:19	0.785		2024-05-21	23:27:56	2024-05-21 23:27:56	184.613		2024-05-21	22:36:19	2024-05-21 22:36:19	0.765
2024-03-27 01:29:15	203.667		2024-03-27 01:14:49	0.816		2024-05-21	23:28:26	2024-05-21 23:28:26	184.886		2024-05-21	22:36:49	2024-05-21 22:36:49	0.777
2024-03-27 01:29:45	205.072		2024-03-27 01:15:19	0.872		2024-05-21	23:28:56	2024-05-21 23:28:56	184.939		2024-05-21	22:37:19	2024-05-21 22:37:19	0.767
2024-03-27 01:30:15	202.417		2024-03-27 01:15:49	0.892		2024-05-21	23:29:26	2024-05-21 23:29:26	184.759		2024-05-21	22:37:49	2024-05-21 22:37:49	0.792
2024-03-27 01:30:45	203.552		2024-03-27 01:16:19	0.843		2024-05-21	23:29:56	2024-05-21 23:29:56	186.745		2024-05-21	22:38:19	2024-05-21 22:38:19	0.782
2024-03-27 01:31:15	203.287		2024-03-27 01:16:49	0.861		2024-05-21	23:30:26	2024-05-21 23:30:26	185.695		2024-05-21	22:38:49	2024-05-21 22:38:49	0.774
2024-03-27 01:31:45	203.824		2024-03-27 01:17:19	0.833		2024-05-21	23:30:56	2024-05-21 23:30:56	184.321		2024-05-21	22:39:19	2024-05-21 22:39:19	0.755
2024-03-27 01:32:15	203.605		2024-03-27 01:17:49	0.828		2024-05-21	23:31:26	2024-05-21 23:31:26	184.252		2024-05-21	22:39:49	2024-05-21 22:39:49	0.767
2024-03-27 01:32:45	203.481		2024-03-27 01:18:19	0.833		2024-05-21	23:31:56	2024-05-21 23:31:56	185.803		2024-05-21	22:40:19	2024-05-21 22:40:19	0.764
2024-03-27 01:33:15	203.76		2024-03-27 01:18:49	0.841		2024-05-21	23:32:26	2024-05-21 23:32:26	185.148		2024-05-21	22:40:49	2024-05-21 22:40:49	0.772
2024-03-27 01:33:45	203.475		2024-03-27 01:19:19	0.861		2024-05-21	23:32:56	2024-05-21 23:32:56	185.801		2024-05-21	22:41:19	2024-05-21 22:41:19	0.754
2024-03-27 01:34:15	203.455		2024-03-27 01:19:49	0.966		2024-05-21	23:33:26	2024-05-21 23:33:26	185.961		2024-05-21	22:41:49	2024-05-21 22:41:49	0.762
2024-03-27 01:34:45	202.974		2024-03-27 01:20:19	1.156		2024-05-21	23:33:56	2024-05-21 23:33:56	185.639		2024-05-21	22:42:19	2024-05-21 22:42:19	0.771
2024-03-27 01:35:15	203.466		2024-03-27 01:20:49	1.503		2024-05-21	23:34:26	2024-05-21 23:34:26	185.376		2024-05-21	22:42:49	2024-05-21 22:42:49	0.759
2024-03-27 01:35:45	203.009		2024-03-27 01:21:19	1.76		2024-05-21	23:34:56	2024-05-21 23:34:56	185.855		2024-05-21	22:43:19	2024-05-21 22:43:19	0.761
2024-03-27 01:36:15	203.461		2024-03-27 01:21:49	1.796		2024-05-21	23:35:26	2024-05-21 23:35:26	185.263		2024-05-21	22:43:49	2024-05-21 22:43:49	0.784
2024-03-27 01:36:45	204.519		2024-03-27 01:22:19	1.664		2024-05-21	23:35:56	2024-05-21 23:35:56	185.302		2024-05-21	22:44:19	2024-05-21 22:44:19	0.769
2024-03-27 01:37:15	203.948		2024-03-27 01:22:49	1.599		2024-05-21	23:36:26	2024-05-21 23:36:26	185.342		2024-05-21	22:44:49	2024-05-21 22:44:49	0.746
2024-03-27 01:37:45	205.512		2024-03-27 01:23:19	1.651		2024-05-21	23:36:56	2024-05-21 23:36:56	184.846		2024-05-21	22:45:19	2024-05-21 22:45:19	0.759
2024-03-27 01:38:15	204.575		2024-03-27 01:23:49	1.697		2024-05-21	23:37:26	2024-05-21 23:37:26	184.776		2024-05-21	22:45:49	2024-05-21 22:45:49	0.756
2024-03-27 01:38:45	204.468		2024-03-27 01:24:19	1.617		2024-05-21	23:37:56	2024-05-21 23:37:56	185.462		2024-05-21	22:46:19	2024-05-21 22:46:19	0.778
2024-03-27 01:39:15	203.585		2024-03-27 01:24:49	1.545		2024-05-21	23:38:26	2024-05-21 23:38:26	185.397		2024-05-21	22:46:49	2024-05-21 22:46:49	0.785
2024-03-27 01:39:45	203.362		2024-03-27 01:25:19	1.7		2024-05-21	23:38:56	2024-05-21 23:38:56	185.816		2024-05-21	22:47:19	2024-05-21 22:47:19	0.785
2024-03-27 01:40:15	204.681		2024-03-27 01:25:49	1.84		2024-05-21	23:39:26	2024-05-21 23:39:26	186.086		2024-05-21	22:47:49	2024-05-21 22:47:49	0.761
2024-03-27 01:40:45	202.43		2024-03-27 01:26:19	1.977		2024-05-21	23:39:56	2024-05-21 23:39:56	185.239		2024-05-21	22:48:19	2024-05-21 22:48:19	0.761
2024-03-27 01:41:15	201.627		2024-03-27 01:26:49	2.019		2024-05-21	23:40:26	2024-05-21 23:40:26	187.296		2024-05-21	22:48:49	2024-05-21 22:48:49	0.773
2024-03-27 01:41:45	200.764		2024-03-27 01:27:19	1.946		2024-05-21	23:40:56	2024-05-21 23:40:56	187.825		2024-05-21	22:49:19	2024-05-21 22:49:19	0.763
2024-03-27 01:42:15	203.073		2024-03-27 01:27:49	1.798		2024-05-21	23:41:26	2024-05-21 23:41:26	190.403		2024-05-21	22:49:49	2024-05-21 22:49:49	0.761
2024-03-27 01:42:45	204.095		2024-03-27 01:28:19	1.669		2024-05-21	23:41:56	2024-05-21 23:41:56	189.844		2024-05-21	22:50:19	2024-05-21 22:50:19	0.76
2024-03-27 01:43:15	202.285		2024-03-27 01:28:49	1.529		2024-05-21	23:42:26	2024-05-21 23:42:26	188.045		2024-05-21	22:50:49	2024-05-21 22:50:49	0.78
2024-03-27 01:43:45	204.96		2024-03-27 01:29:19	1.359		2024-05-21	23:42:56	2024-05-21 23:42:56	192.79		2024-05-21	22:51:19	2024-05-21 22:51:19	0.783
2024-03-27 01:44:15	204.015		2024-03-27 01:29:49	1.215		2024-05-21	23:43:26	2024-05-21 23:43:26	196.937		2024-05-21	22:51:49	2024-05-21 22:51:49	0.758
2024-03-27 01:44:45	201.194		2024-03-27 01:30:19	1.066		2024-05-21	23:43:56	2024-05-21 23:43:56	196.964		2024-05-21	22:52:19	2024-05-21 22:52:19	0.763
2024-03-27 01:45:15	202.533		2024-03-27 01:30:49	0.935		2024-05-21	23:44:26	2024-05-21 23:44:26	197.669		2024-05-21	22:52:49	2024-05-21 22:52:49	0.763
2024-03-27 01:45:45	202.386		2024-03-27 01:31:19	0.915		2024-05-21	23:44:56	2024-05-21 23:44:56	197.822		2024-05-21	22:53:19	2024-05-21 22:53:19	0.773
2024-03-27 01:46:15	203.24		2024-03-27 01:31:49	0.925		2024-05-21	23:45:26	2024-05-21 23:45:26	197.371		2024-05-21	22:53:49	2024-05-21 22:53:49	0.76
2024-03-27 01:46:45	203.194		2024-03-27 01:32:19	0.923		2024-05-21	23:45:56	2024-05-21 23:45:56	199.428		2024-05-21	22:54:19	2024-05-21 22:54:19	0.785
2024-03-27 01:47:15	204.864		2024-03-27 01:32:49	0.941		2024-05-21	23:46:26	2024-05-21 23:46:26	212.821		2024-05-21	22:54:49	2024-05-21 22:54:49	0.773
2024-03-27 01:47:45	204.077		2024-03-27 01:33:19	0.9		2024-05-21	23:46:56	2024-05-21 23:46:56	216.833		2024-05-21	22:55:19	2024-05-21 22:55:19	0.787
2024-03-27 01:48:15	203.738		2024-03-27 01:33:49	0.838		2024-05-21	23:47:26	2024-05-21 23:47:26	207.254		2024-05-21	22:55:49	2024-05-21 22:55:49	0.775
2024-03-27 01:48:45	205.013		2024-03-27 01:34:19	0.823		2024-05-21	23:47:56	2024-05-21 23:47:56	204.127		2024-05-21	22:56:19	2024-05-21 22:56:19	0.782
2024-03-27 01:49:15	204.165		2024-03-27 01:34:49	0.795		2024-05-21	23:48:26	2024-05-21 23:48:26	201.624		2024-05-21	22:56:49	2024-05-21 22:56:49	0.785
2024-03-27 01:49:45	198.57		2024-03-27 01:35:19	0.79		2024-05-21	23:48:56	2024-05-21 23:48:56	200.647		2024-05-21	22:57:19	2024-05-21 22:57:19	0.773
2024-03-27 01:50:15	195.18		2024-03-27 01:35:49	0.792		2024-05-21	23:49:26	2024-05-21 23:49:26	201.981		2024-05-21	22:57:49	2024-05-21 22:57:49	0.782
2024-03-27 01:50:45	204.143		2024-03-27 01:36:19	0.815		2024-05-21	23:49:56	2024-05-21 23:49:56	201.916		2024-05-21	22:58:19	2024-05-21 22:58:19	0.748
2024-03-27 01:51:15	203.247		2024-03-27 01:36:49	0.828		2024-05-21	23:50:26	2024-05-21 23:50:26	202.223		2024-05-21	22:58:49	2024-05-21 22:58:49	0.77
2024-03-27 01:51:45	205.929		2024-03-27 01:37:19	0.792		2024-05-21	23:50:56	2024-05-21 23:50:56	199.804		2024-05-21	22:59:19	2024-05-21 22:59:19	0.76
2024-03-27 01:52:15	205.662		2024-03-27 01:37:49	0.782		2024-05-21	23:51:26	2024-05-21 23:51:26	202.321		2024-05-21	22:59:49	2024-05-21 22:59:49	0.787
2024-03-27 01:52:45	205.217		2024-03-27 01:38:19	0.795		2024-05-21	23:51:56	2024-05-21 23:51:56	208.086		2024-05-21	23:00:19	2024-05-21 23:00:19	0.765
2024-03-27 01:53:15	203.335		2024-03-27 01:38:49	0.759		2024-05-21	23:52:26	2024-05-21 23:52:26	205.696		2024-05-21	23:00:49	2024-05-21 23:00:49	0.768
2024-03-27 01:53:45	203.658		2024-03-27 01:39:19	0.66		2024-05-21	23:52:56	2024-05-21 23:52:56	207.109		2024-05-21	23:01:19	2024-05-21 23:01:19	0.748
2024-03-27 01:54:15	203.282		2024-03-27 01:39:49	0.578		2024-05-21	23:53:26	2024-05-21 23:53:26	210.424		2024-05-21	23:01:49	2024-05-21 23:01:49	0.77
2024-03-27 01:54:45	203.251		2024-03-27 01:40:19	0.533		2024-05-21	23:53:56	2024-05-21 23:53:56	213.708		2024-05-21	23:02:19	2024-05-21 23:02:19	0.765
2024-03-27 01:55:15	203.868		2024-03-27 01:40:49	0.459		2024-05-21	23:54:26	2024-05-21 23:54:26	212.963		2024-05-21	23:02:49	2024-05-21 23:02:49	0.77
2024-03-27 01:55:45	203.251		2024-03-27 01:41:19	0.456		2024-05-21	23:54:56	2024-05-21 23:54:56	212.824		2024-05-21	23:03:19	2024-05-21 23:03:19	0.787
2024-03-27 01:56:15	202.336		2024-03-27 01:41:49	0.418		2024-05-21	23:55:26	2024-05-21 23:55:26	214.07		2024-05-21	23:03:49	2024-05-21 23:03:49	0.763
2024-03-27 01:56:45	203.789		2024-03-27 01:42:19	0.403		2024-05-21	23:55:56	2024-05-21 23:55:56	214.929		2024-05-21	23:04:19	2024-05-21 23:04:19	0.765
2024-03-27 01:57:15	204.03		2024-03-27 01:42:49	0.472		2024-05-21	23:56:26	2024-05-21 23:56:26	215.453		2024-05-21	23:04:49	2024-05-21 23:04:49	0.777
2024-03-27 01:57:45	203.574		2024-03-27 01:43:19	0.469		2024-05-21	23:56:56	2024-05-21 23:56:56	218.82		2024-05-21	23:05:19	2024-05-21 23:05:19	0.785
2024-03-27 01:58:15	204.436		2024-03-27 01:43:49	0.527		2024-05-21	23:57:26	2024-05-21 23:57:26	219.239		2024-05-21	23:05:49	2024-05-21 23:05:49	0.777
2024-03-27 01:58:45	203.848		2024-03-27 01:44:19	0.634		2024-05-21	23:57:56	2024-05-21 23:57:56	220.403		2024-05-21	23:06:19	2024-05-21 23:06:19	0.782
2024-03-27 01:59:15	203.76		2024-03-27 01:44:49	0.772		2024-05-21	23:58:26	2024-05-21 23:58:26	221.237		2024-05-21	23:06:49	2024-05-21 23:06:49	0.77
2024-03-27 01:59:45	204.452		2024-03-27 01:45:19	0.82		2024-05-21	23:58:56	2024-05-21 23:58:56	220.271		2024-05-21	23:07:19	2024-05-21 23:07:19	0.775
2024-03-27 02:00:15	203.78		2024-03-27 01:45:49	0.928		2024-05-21	23:59:26	2024-05-21 23:59:26	219.903		2024-05-21	23:07:49	2024-05-21 23:07:49	0.807
2024-03-27 02:00:45	202.191		2024-03-27 01:46:19	0.986		2024-05-21	23:59:56	2024-05-21 23:59:56	220.055		2024-05-21	23:08:19	2024-05-21 23:08:19	0.782
2024-03-27 02:01:15	203.55		2024-03-27 01:46:49	0.989		2024-05-22	00:00:26	2024-05-22 00:00:26	219.29		2024-05-21	23:08:49	2024-05-21 23:08:49	0.77
2024-03-27 02:01:45	204.428		2024-03-27 01:47:19	1.305		2024-05-22	00:00:56	2024-05-22 00:00:56	218.059		2024-05-21	23:09:19	2024-05-21 23:09:19	0.775
2024-03-27 02:02:15	204.443		2024-03-27 01:47:49	1.464		2024-05-22	00:01:26	2024-05-22 00:01:26	218.38		2024-05-21	23:09:49	2024-05-21 23:09:49	0.777
2024-03-27 02:02:45	203.959		2024-03-27 01:48:19	1.498		2024-05-22	00:01:56	2024-05-22 00:01:56	217.989		2024-05-21	23:10:19	2024-05-21 23:10:19	0.78
2024-03-27 02:03:15	203.168		2024-03-27 01:48:49	1.477		2024-05-22	00:02:26	2024-05-22 00:02:26	221.83		2024-05-21	23:10:49	2024-05-21 23:10:49	0.753
2024-03-27 02:03:45	204.243		2024-03-27 01:49:19	1.361		2024-05-22	00:02:56	2024-05-22 00:02:56	223.959		2024-05-21	23:11:19	2024-05-21 23:11:19	0.795
2024-03-27 02:04:15	204.47		2024-03-27 01:49:49	1.33		2024-05-22	00:03:26	2024-05-22 00:03:26	211.532		2024-05-21	23:11:49	2024-05-21 23:11:49	0.775
2024-03-27 02:04:45	204.125		2024-03-27 01:50:19	1.245		2024-05-22	00:03:56	2024-05-22 00:03:56	209.489		2024-05-21	23:12:19	2024-05-21 23:12:19	0.773
2024-03-27 02:05:15	203.716		2024-03-27 01:50:49	1.186		2024-05-22	00:04:26	2024-05-22 00:04:26	208.364		2024-05-21	23:12:49	2024-05-21 23:12:49	0.768
2024-03-27 02:05:45	202.044		2024-03-27 01:51:19	1.12		2024-05-22	00:04:56	2024-05-22 00:04:56	208.189		2024-05-21	23:13:19	2024-05-21 23:13:19	0.755
2024-03-27 02:06:15	202.929		2024-03-27 01:51:49	0.974		2024-05-22	00:05:26	2024-05-22 00:05:26	208.346		2024-05-21	23:13:49	2024-05-21 23:13:49	0.76
2024-03-27 02:06:45	203.784		2024-03-27 01:52:19	0.767		2024-05-22	00:05:56	2024-05-22 00:05:56	209.636		2024-05-21	23:14:19	2024-05-21 23:14:19	0.775
2024-03-27 02:07:15	203.366		2024-03-27 01:52:49	0.984		2024-05-22	00:06:26	2024-05-22 00:06:26	210.431		2024-05-21	23:14:49	2024-05-21 23:14:49	0.765
2024-03-27 02:07:45	203.924		2024-03-27 01:53:19	1.04		2024-05-22	00:06:56	2024-05-22 00:06:56	208.15		2024-05-21	23:15:19	2024-05-21 23:15:19	0.763
2024-03-27 02:08:15	204.761		2024-03-27 01:53:49	0.933		2024-05-22	00:07:26	2024-05-22 00:07:26	211.448		2024-05-21	23:15:49	2024-05-21 23:15:49	0.76
2024-03-27 02:08:45	203.375		2024-03-27 01:54:19	0.8		2024-05-22	00:07:56	2024-05-22 00:07:56	214.861		2024-05-21	23:16:19	2024-05-21 23:16:19	0.78
2024-03-27 02:09:15	204.259		2024-03-27 01:54:49	0.642		2024-05-22	00:08:26	2024-05-22 00:08:26	216.453		2024-05-21	23:16:49	2024-05-21 23:16:49	0.78
2024-03-27 02:09:45	204.055		2024-03-27 01:55:19	0.515		2024-05-22	00:08:56	2024-05-22 00:08:56	220.092		2024-05-21	23:17:19	2024-05-21 23:17:19	0.778
2024-03-27 02:10:15	204.39		2024-03-27 01:55:49	0.395		2024-05-22	00:09:26	2024-05-22 00:09:26	222.237		2024-05-21	23:17:49	2024-05-21 23:17:49	0.77
2024-03-27 02:10:45	204.911		2024-03-27 01:56:19	0.342		2024-05-22	00:09:56	2024-05-22 00:09:56	222.199		2024-05-21	23:18:19	2024-05-21 23:18:19	0.77
2024-03-27 02:11:15	202.52		2024-03-27 01:56:49	0.271		2024-05-22	00:10:26	2024-05-22 00:10:26	222.838		2024-05-21	23:18:49	2024-05-21 23:18:49	0.765
2024-03-27 02:11:45	204.243		2024-03-27 01:57:19	0.223		2024-05-22	00:10:56	2024-05-22 00:10:56	220.692		2024-05-21	23:19:19	2024-05-21 23:19:19	0.765
2024-03-27 02:12:15	204.971		2024-03-27 01:57:49	0.208		2024-05-22	00:11:26	2024-05-22 00:11:26	222.034		2024-05-21	23:19:49	2024-05-21 23:19:49	0.779
2024-03-27 02:12:45	205.494		2024-03-27 01:58:19	0.205		2024-05-22	00:11:56	2024-05-22 00:11:56	222.719		2024-05-21	23:20:19	2024-05-21 23:20:19	0.782
2024-03-27 02:13:15	203.935		2024-03-27 01:58:49	0.162		2024-05-22	00:12:26	2024-05-22 00:12:26	223.366		2024-05-21	23:20:49	2024-05-21 23:20:49	0.787
2024-03-27 02:13:45	204.463		2024-03-27 01:59:19	0.127		2024-05-22	00:12:56	2024-05-22 00:12:56	219.948		2024-05-21	23:21:19	2024-05-21 23:21:19	0.77
2024-03-27 02:14:15	203.995		2024-03-27 01:59:49	0.109		2024-05-22	00:13:26	2024-05-22 00:13:26	218.049		2024-05-21	23:21:49	2024-05-21 23:21:49	0.758
2024-03-27 02:14:45	203.857		2024-03-27 02:00:19	0.079		2024-05-22	00:13:56	2024-05-22 00:13:56	219.248		2024-05-21	23:22:19	2024-05-21 23:22:19	0.775
2024-03-27 02:15:15	203.563		2024-03-27 02:00:49	0.102		2024-05-22	00:14:26	2024-05-22 00:14:26	219.232		2024-05-21	23:22:49	2024-05-21 23:22:49	0.794
2024-03-27 02:15:45	203.205		2024-03-27 02:01:19	0.226		2024-05-22	00:14:56	2024-05-22 00:14:56	222.405		2024-05-21	23:23:19	2024-05-21 23:23:19	0.745
2024-03-27 02:16:15	202.325		2024-03-27 02:01:49	0.117		2024-05-22	00:15:26	2024-05-22 00:15:26	222.446		2024-05-21	23:23:49	2024-05-21 23:23:49	0.772
2024-03-27 02:16:45	203.384		2024-03-27 02:02:19	0.071		2024-05-22	00:15:56	2024-05-22 00:15:56	221.48		2024-05-21	23:24:19	2024-05-21 23:24:19	0.767
2024-03-27 02:17:15	202.333		2024-03-27 02:02:49	0.097		2024-05-22	00:16:26	2024-05-22 00:16:26	221.923		2024-05-21	23:24:49	2024-05-21 23:24:49	0.768
2024-03-27 02:17:45	202.861		2024-03-27 02:03:19	0.117		2024-05-22	00:16:56	2024-05-22 00:16:56	223.253		2024-05-21	23:25:19	2024-05-21 23:25:19	0.768
2024-03-27 02:18:15	202.804		2024-03-27 02:03:49	0.132		2024-05-22	00:17:26	2024-05-22 00:17:26	223.615		2024-05-21	23:25:49	2024-05-21 23:25:49	0.766
2024-03-27 02:18:45	204.046		2024-03-27 02:04:19	0.084		2024-05-22	00:17:56	2024-05-22 00:17:56	223.66		2024-05-21	23:26:19	2024-05-21 23:26:19	0.764
2024-03-27 02:19:15	202.885		2024-03-27 02:04:49	0.099		2024-05-22	00:18:26	2024-05-22 00:18:26	222.836		2024-05-21	23:26:49	2024-05-21 23:26:49	0.781
2024-03-27 02:19:45	203.362		2024-03-27 02:05:19	0.112		2024-05-22	00:18:56	2024-05-22 00:18:56	221.717		2024-05-21	23:27:19	2024-05-21 23:27:19	0.763
2024-03-27 02:20:15	202.804		2024-03-27 02:05:49	0.094		2024-05-22	00:19:26	2024-05-22 00:19:26	221.173		2024-05-21	23:27:49	2024-05-21 23:27:49	0.778
2024-03-27 02:20:45	202.888		2024-03-27 02:06:19	0.107		2024-05-22	00:19:56	2024-05-22 00:19:56	221.896		2024-05-21	23:28:19	2024-05-21 23:28:19	0.768
2024-03-27 02:21:15	204.09		2024-03-27 02:06:49	0.059		2024-05-22	00:20:26	2024-05-22 00:20:26	222.007		2024-05-21	23:28:49	2024-05-21 23:28:49	0.78
2024-03-27 02:21:45	202.879		2024-03-27 02:07:19	0.104		2024-05-22	00:20:56	2024-05-22 00:20:56	221.341		2024-05-21	23:29:19	2024-05-21 23:29:19	0.758
2024-03-27 02:22:15	202.696		2024-03-27 02:07:49	0.082		2024-05-22	00:21:26	2024-05-22 00:21:26	220.069		2024-05-21	23:29:49	2024-05-21 23:29:49	0.763
2024-03-27 02:22:45	199.443		2024-03-27 02:08:19	0.107		2024-05-22	00:21:56	2024-05-22 00:21:56	225.136		2024-05-21	23:30:19	2024-05-21 23:30:19	0.741
2024-03-27 02:23:15	200.635		2024-03-27 02:08:49	0.14		2024-05-22	00:22:26	2024-05-22 00:22:26	227.17		2024-05-21	23:30:49	2024-05-21 23:30:49	0.758
2024-03-27 02:23:45	202.102		2024-03-27 02:09:19	0.109		2024-05-22	00:22:56	2024-05-22 00:22:56	229.867		2024-05-21	23:31:19	2024-05-21 23:31:19	0.795
2024-03-27 02:24:15	200.907		2024-03-27 02:09:49	0.074		2024-05-22	00:23:26	2024-05-22 00:23:26	229.235		2024-05-21	23:31:49	2024-05-21 23:31:49	0.768
2024-03-27 02:24:45	202.082		2024-03-27 02:10:19	0.14		2024-05-22	00:23:56	2024-05-22 00:23:56	229.246		2024-05-21	23:32:19	2024-05-21 23:32:19	0.746
2024-03-27 02:25:15	202.034		2024-03-27 02:10:49	0.243		2024-05-22	00:24:26	2024-05-22 00:24:26	226.388		2024-05-21	23:32:49	2024-05-21 23:32:49	0.773
2024-03-27 02:25:45	203.047		2024-03-27 02:11:19	0.243		2024-05-22	00:24:56	2024-05-22 00:24:56	221.16		2024-05-21	23:33:19	2024-05-21 23:33:19	0.767
2024-03-27 02:26:15	203.115		2024-03-27 02:11:49	0.286		2024-05-22	00:25:26	2024-05-22 00:25:26	219.802		2024-05-21	23:33:49	2024-05-21 23:33:49	0.784
2024-03-27 02:26:45	203.02		2024-03-27 02:12:19	0.517		2024-05-22	00:25:56	2024-05-22 00:25:56	221.522		2024-05-21	23:34:19	2024-05-21 23:34:19	0.763
2024-03-27 02:27:15	203.069		2024-03-27 02:12:49	0.56		2024-05-22	00:26:26	2024-05-22 00:26:26	221.246		2024-05-21	23:34:49	2024-05-21 23:34:49	0.777
2024-03-27 02:27:45	202.717		2024-03-27 02:13:19	0.525		2024-05-22	00:26:56	2024-05-22 00:26:56	219.732		2024-05-21	23:35:19	2024-05-21 23:35:19	0.76
2024-03-27 02:28:15	202.367		2024-03-27 02:13:49	0.499		2024-05-22	00:27:26	2024-05-22 00:27:26	218.082		2024-05-21	23:35:49	2024-05-21 23:35:49	0.777
2024-03-27 02:28:45	202.591		2024-03-27 02:14:19	0.634		2024-05-22	00:27:56	2024-05-22 00:27:56	218.567		2024-05-21	23:36:19	2024-05-21 23:36:19	0.78
2024-03-27 02:29:15	201.815		2024-03-27 02:14:49	1.112		2024-05-22	00:28:26	2024-05-22 00:28:26	218.453		2024-05-21	23:36:49	2024-05-21 23:36:49	0.767
2024-03-27 02:29:45	201.876		2024-03-27 02:15:19	1.351		2024-05-22	00:28:56	2024-05-22 00:28:56	217.853		2024-05-21	23:37:19	2024-05-21 23:37:19	0.76
2024-03-27 02:30:15	202.664		2024-03-27 02:15:49	1.423		2024-05-22	00:29:26	2024-05-22 00:29:26	217.499		2024-05-21	23:37:49	2024-05-21 23:37:49	0.777
2024-03-27 02:30:45	201.498		2024-03-27 02:16:19	1.219		2024-05-22	00:29:56	2024-05-22 00:29:56	216.842		2024-05-21	23:38:19	2024-05-21 23:38:19	0.76
2024-03-27 02:31:15	202.615		2024-03-27 02:16:49	1.066		2024-05-22	00:30:26	2024-05-22 00:30:26	215.856		2024-05-21	23:38:49	2024-05-21 23:38:49	0.76
2024-03-27 02:31:45	204.963		2024-03-27 02:17:19	0.93		2024-05-22	00:30:56	2024-05-22 00:30:56	216.053		2024-05-21	23:39:19	2024-05-21 23:39:19	0.762
2024-03-27 02:32:15	203.266		2024-03-27 02:17:49	0.92		2024-05-22	00:31:26	2024-05-22 00:31:26	220.78		2024-05-21	23:39:49	2024-05-21 23:39:49	0.794
2024-03-27 02:32:45	205.039		2024-03-27 02:18:19	0.744		2024-05-22	00:31:56	2024-05-22 00:31:56	219.866		2024-05-21	23:40:19	2024-05-21 23:40:19	0.762
2024-03-27 02:33:15	204.266		2024-03-27 02:18:49	0.943		2024-05-22	00:32:26	2024-05-22 00:32:26	222.098		2024-05-21	23:40:49	2024-05-21 23:40:49	0.779
2024-03-27 02:33:45	204.533		2024-03-27 02:19:19	1.423		2024-05-22	00:32:56	2024-05-22 00:32:56	224.623		2024-05-21	23:41:19	2024-05-21 23:41:19	0.776
2024-03-27 02:34:15	204.667		2024-03-27 02:19:49	1.238		2024-05-22	00:33:26	2024-05-22 00:33:26	226.084		2024-05-21	23:41:49	2024-05-21 23:41:49	0.761
2024-03-27 02:34:45	204.836		2024-03-27 02:20:19	1.135		2024-05-22	00:33:56	2024-05-22 00:33:56	226.839		2024-05-21	23:42:19	2024-05-21 23:42:19	0.776
2024-03-27 02:35:15	203.228		2024-03-27 02:20:49	0.902		2024-05-22	00:34:26	2024-05-22 00:34:26	226.912		2024-05-21	23:42:49	2024-05-21 23:42:49	0.786
2024-03-27 02:35:45	205.494		2024-03-27 02:21:19	0.94		2024-05-22	00:34:56	2024-05-22 00:34:56	226.89		2024-05-21	23:43:19	2024-05-21 23:43:19	0.771
2024-03-27 02:36:15	204.544		2024-03-27 02:21:49	0.963		2024-05-22	00:35:26	2024-05-22 00:35:26	227.417		2024-05-21	23:43:49	2024-05-21 23:43:49	0.793
2024-03-27 02:36:45	205.41		2024-03-27 02:22:19	0.836		2024-05-22	00:35:56	2024-05-22 00:35:56	226.161		2024-05-21	23:44:19	2024-05-21 23:44:19	0.759
2024-03-27 02:37:15	203.415		2024-03-27 02:22:49	0.67		2024-05-22	00:36:26	2024-05-22 00:36:26	226.466		2024-05-21	23:44:49	2024-05-21 23:44:49	0.795
2024-03-27 02:37:45	204.276		2024-03-27 02:23:19	0.693		2024-05-22	00:36:56	2024-05-22 00:36:56	227.096		2024-05-21	23:45:19	2024-05-21 23:45:19	0.771
2024-03-27 02:38:15	204.894		2024-03-27 02:23:49	0.586		2024-05-22	00:37:26	2024-05-22 00:37:26	226.847		2024-05-21	23:45:49	2024-05-21 23:45:49	0.766
2024-03-27 02:38:45	203.662		2024-03-27 02:24:19	0.833		2024-05-22	00:37:56	2024-05-22 00:37:56	228.334		2024-05-21	23:46:19	2024-05-21 23:46:19	0.761
2024-03-27 02:39:15	203.523		2024-03-27 02:24:49	1.043		2024-05-22	00:38:26	2024-05-22 00:38:26	228.024		2024-05-21	23:46:49	2024-05-21 23:46:49	0.779
2024-03-27 02:39:45	204.841		2024-03-27 02:25:19	0.966		2024-05-22	00:38:56	2024-05-22 00:38:56	229.626		2024-05-21	23:47:19	2024-05-21 23:47:19	0.784
2024-03-27 02:40:15	204.975		2024-03-27 02:25:49	1.069		2024-05-22	00:39:26	2024-05-22 00:39:26	229.058		2024-05-21	23:47:49	2024-05-21 23:47:49	0.769
2024-03-27 02:40:45	204.154		2024-03-27 02:26:19	1.328		2024-05-22	00:39:56	2024-05-22 00:39:56	229.14		2024-05-21	23:48:19	2024-05-21 23:48:19	0.772
2024-03-27 02:41:15	205.149		2024-03-27 02:26:49	1.259		2024-05-22	00:40:26	2024-05-22 00:40:26	229.067		2024-05-21	23:48:49	2024-05-21 23:48:49	0.764
2024-03-27 02:41:45	203.096		2024-03-27 02:27:19	0.617		2024-05-22	00:40:56	2024-05-22 00:40:56	230.011		2024-05-21	23:49:19	2024-05-21 23:49:19	0.772
2024-03-27 02:42:15	204.652		2024-03-27 02:27:49	0.601		2024-05-22	00:41:26	2024-05-22 00:41:26	230.235		2024-05-21	23:49:49	2024-05-21 23:49:49	0.786
2024-03-27 02:42:45	203.855		2024-03-27 02:28:19	0.589		2024-05-22	00:41:56	2024-05-22 00:41:56	229.628		2024-05-21	23:50:19	2024-05-21 23:50:19	0.779
2024-03-27 02:43:15	202.799		2024-03-27 02:28:49	0.512		2024-05-22	00:42:26	2024-05-22 00:42:26	229.327		2024-05-21	23:50:49	2024-05-21 23:50:49	0.784
2024-03-27 02:43:45	204.721		2024-03-27 02:29:19	0.464		2024-05-22	00:42:56	2024-05-22 00:42:56	230.308		2024-05-21	23:51:19	2024-05-21 23:51:19	0.777
2024-03-27 02:44:15	206.013		2024-03-27 02:29:49	0.434		2024-05-22	00:43:26	2024-05-22 00:43:26	229.803		2024-05-21	23:51:49	2024-05-21 23:51:49	0.757
2024-03-27 02:44:45	206.154		2024-03-27 02:30:19	0.355		2024-05-22	00:43:56	2024-05-22 00:43:56	228.407		2024-05-21	23:52:19	2024-05-21 23:52:19	0.77
2024-03-27 02:45:15	204.332		2024-03-27 02:30:49	0.426		2024-05-22	00:44:26	2024-05-22 00:44:26	227.647		2024-05-21	23:52:49	2024-05-21 23:52:49	0.765
2024-03-27 02:45:45	205.316		2024-03-27 02:31:19	0.599		2024-05-22	00:44:56	2024-05-22 00:44:56	226.926		2024-05-21	23:53:19	2024-05-21 23:53:19	0.777
2024-03-27 02:46:15	206.8		2024-03-27 02:31:49	0.63		2024-05-22	00:45:26	2024-05-22 00:45:26	224.28		2024-05-21	23:53:49	2024-05-21 23:53:49	0.771
2024-03-27 02:46:45	206.019		2024-03-27 02:32:19	1.095		2024-05-22	00:45:56	2024-05-22 00:45:56	222.439		2024-05-21	23:54:19	2024-05-21 23:54:19	0.778
2024-03-27 02:47:15	205.885		2024-03-27 02:32:49	1.085		2024-05-22	00:46:26	2024-05-22 00:46:26	228.475		2024-05-21	23:54:49	2024-05-21 23:54:49	0.798
2024-03-27 02:47:45	206.71		2024-03-27 02:33:19	0.875		2024-05-22	00:46:56	2024-05-22 00:46:56	229.95		2024-05-21	23:55:19	2024-05-21 23:55:19	0.754
2024-03-27 02:48:15	206.451		2024-03-27 02:33:49	0.847		2024-05-22	00:47:26	2024-05-22 00:47:26	230.354		2024-05-21	23:55:49	2024-05-21 23:55:49	0.781
2024-03-27 02:48:45	205.667		2024-03-27 02:34:19	0.75		2024-05-22	00:47:56	2024-05-22 00:47:56	230.023		2024-05-21	23:56:19	2024-05-21 23:56:19	0.791
2024-03-27 02:49:15	206.345		2024-03-27 02:34:49	0.684		2024-05-22	00:48:26	2024-05-22 00:48:26	230.531		2024-05-21	23:56:49	2024-05-21 23:56:49	0.781
2024-03-27 02:49:45	205.981		2024-03-27 02:35:19	0.508		2024-05-22	00:48:56	2024-05-22 00:48:56	230.806		2024-05-21	23:57:19	2024-05-21 23:57:19	0.786
2024-03-27 02:50:15	205.629		2024-03-27 02:35:49	0.49		2024-05-22	00:49:26	2024-05-22 00:49:26	231.787		2024-05-21	23:57:49	2024-05-21 23:57:49	0.769
2024-03-27 02:50:45	204.6		2024-03-27 02:36:19	0.44		2024-05-22	00:49:56	2024-05-22 00:49:56	232.218		2024-05-21	23:58:19	2024-05-21 23:58:19	0.774
2024-03-27 02:51:15	206.053		2024-03-27 02:36:49	0.341		2024-05-22	00:50:26	2024-05-22 00:50:26	232.331		2024-05-21	23:58:49	2024-05-21 23:58:49	0.799
2024-03-27 02:51:45	206.129		2024-03-27 02:37:19	0.255		2024-05-22	00:50:56	2024-05-22 00:50:56	232.363		2024-05-21	23:59:19	2024-05-21 23:59:19	0.767
2024-03-27 02:52:15	206.307		2024-03-27 02:37:49	0.255		2024-05-22	00:51:26	2024-05-22 00:51:26	232.366		2024-05-21	23:59:49	2024-05-21 23:59:49	0.785
2024-03-27 02:52:45	204.923		2024-03-27 02:38:19	0.224		2024-05-22	00:51:56	2024-05-22 00:51:56	232.538		2024-05-22	00:00:19	2024-05-22 00:00:19	0.78
2024-03-27 02:53:15	205.392		2024-03-27 02:38:49	0.43		2024-05-22	00:52:26	2024-05-22 00:52:26	232.466		2024-05-22	00:00:49	2024-05-22 00:00:49	0.798
2024-03-27 02:53:45	205.931		2024-03-27 02:39:19	0.263		2024-05-22	00:52:56	2024-05-22 00:52:56	231.947		2024-05-22	00:01:19	2024-05-22 00:01:19	0.758
2024-03-27 02:54:15	204.894		2024-03-27 02:39:49	0.209		2024-05-22	00:53:26	2024-05-22 00:53:26	230.598		2024-05-22	00:01:49	2024-05-22 00:01:49	0.79
2024-03-27 02:54:45	206.426		2024-03-27 02:40:19	0.293		2024-05-22	00:53:56	2024-05-22 00:53:56	230.88		2024-05-22	00:02:19	2024-05-22 00:02:19	0.781
2024-03-27 02:55:15	206.223		2024-03-27 02:40:49	0.27		2024-05-22	00:54:26	2024-05-22 00:54:26	230.937		2024-05-22	00:02:49	2024-05-22 00:02:49	0.771
2024-03-27 02:55:45	206.604		2024-03-27 02:41:19	0.527		2024-05-22	00:54:56	2024-05-22 00:54:56	230.691		2024-05-22	00:03:19	2024-05-22 00:03:19	0.778
2024-03-27 02:56:15	205.11		2024-03-27 02:41:49	0.427		2024-05-22	00:55:26	2024-05-22 00:55:26	230.461		2024-05-22	00:03:49	2024-05-22 00:03:49	0.785
2024-03-27 02:56:45	206.363		2024-03-27 02:42:19	0.552		2024-05-22	00:55:56	2024-05-22 00:55:56	231.011		2024-05-22	00:04:19	2024-05-22 00:04:19	0.795
2024-03-27 02:57:15	205.284		2024-03-27 02:42:49	1.372		2024-05-22	00:56:26	2024-05-22 00:56:26	230.585		2024-05-22	00:04:49	2024-05-22 00:04:49	0.761
2024-03-27 02:57:45	204.729		2024-03-27 02:43:19	2.799		2024-05-22	00:56:56	2024-05-22 00:56:56	230.439		2024-05-22	00:05:19	2024-05-22 00:05:19	0.778
2024-03-27 02:58:15	205.965		2024-03-27 02:43:49	2.397		2024-05-22	00:57:26	2024-05-22 00:57:26	230.854		2024-05-22	00:05:49	2024-05-22 00:05:49	0.789
2024-03-27 02:58:45	206.935		2024-03-27 02:44:19	1.318		2024-05-22	00:57:56	2024-05-22 00:57:56	230.794		2024-05-22	00:06:19	2024-05-22 00:06:19	0.764
2024-03-27 02:59:15	206.759		2024-03-27 02:44:49	2.041		2024-05-22	00:58:26	2024-05-22 00:58:26	230.855		2024-05-22	00:06:49	2024-05-22 00:06:49	0.784
2024-03-27 02:59:45	206.277		2024-03-27 02:45:19	2.219		2024-05-22	00:58:56	2024-05-22 00:58:56	231.511		2024-05-22	00:07:19	2024-05-22 00:07:19	0.765
2024-03-27 03:00:15	205.264		2024-03-27 02:45:49	1.89		2024-05-22	00:59:26	2024-05-22 00:59:26	231.729		2024-05-22	00:07:49	2024-05-22 00:07:49	0.777
2024-03-27 03:00:45	206.353		2024-03-27 02:46:19	2.483		2024-05-22	00:59:56	2024-05-22 00:59:56	231.51		2024-05-22	00:08:19	2024-05-22 00:08:19	0.777
2024-03-27 03:01:15	205.884		2024-03-27 02:46:49	2.399		2024-05-22	01:00:26	2024-05-22 01:00:26	231.352		2024-05-22	00:08:49	2024-05-22 00:08:49	0.779
2024-03-27 03:01:45	206.775		2024-03-27 02:47:19	1.932		2024-05-22	01:00:56	2024-05-22 01:00:56	231.17		2024-05-22	00:09:19	2024-05-22 00:09:19	0.784
2024-03-27 03:02:15	208.26		2024-03-27 02:47:49	1.937		2024-05-22	01:01:26	2024-05-22 01:01:26	228.462		2024-05-22	00:09:49	2024-05-22 00:09:49	0.77
2024-03-27 03:02:45	207.556		2024-03-27 02:48:19	3.836		2024-05-22	01:01:56	2024-05-22 01:01:56	225.223		2024-05-22	00:10:19	2024-05-22 00:10:19	0.777
2024-03-27 03:03:15	207.183		2024-03-27 02:48:49	3.93		2024-05-22	01:02:26	2024-05-22 01:02:26	225.781		2024-05-22	00:10:49	2024-05-22 00:10:49	0.779
2024-03-27 03:03:45	207.011		2024-03-27 02:49:19	4.607		2024-05-22	01:02:56	2024-05-22 01:02:56	229.15		2024-05-22	00:11:19	2024-05-22 00:11:19	0.782
2024-03-27 03:04:15	207.627		2024-03-27 02:49:49	5.405		2024-05-22	01:03:26	2024-05-22 01:03:26	230.495		2024-05-22	00:11:49	2024-05-22 00:11:49	0.799
2024-03-27 03:04:45	206.849		2024-03-27 02:50:19	6.321		2024-05-22	01:03:56	2024-05-22 01:03:56	231.601		2024-05-22	00:12:19	2024-05-22 00:12:19	0.782
2024-03-27 03:05:15	206.727		2024-03-27 02:50:49	9.816		2024-05-22	01:04:26	2024-05-22 01:04:26	231.242		2024-05-22	00:12:49	2024-05-22 00:12:49	0.787
2024-03-27 03:05:45	206.326		2024-03-27 02:51:19	10.054		2024-05-22	01:04:56	2024-05-22 01:04:56	231.048		2024-05-22	00:13:19	2024-05-22 00:13:19	0.79
2024-03-27 03:06:15	206.84		2024-03-27 02:51:49	11.949		2024-05-22	01:05:26	2024-05-22 01:05:26	231.038		2024-05-22	00:13:49	2024-05-22 00:13:49	0.787
2024-03-27 03:06:45	207.002		2024-03-27 02:52:19	14.912		2024-05-22	01:05:56	2024-05-22 01:05:56	231.384		2024-05-22	00:14:19	2024-05-22 00:14:19	0.777
2024-03-27 03:07:15	206.831		2024-03-27 02:52:49	16.616		2024-05-22	01:06:26	2024-05-22 01:06:26	231.075		2024-05-22	00:14:49	2024-05-22 00:14:49	0.767
2024-03-27 03:07:45	207.181		2024-03-27 02:53:19	19.497		2024-05-22	01:06:56	2024-05-22 01:06:56	230.943		2024-05-22	00:15:19	2024-05-22 00:15:19	0.809
2024-03-27 03:08:15	208.73		2024-03-27 02:53:49	22.524		2024-05-22	01:07:26	2024-05-22 01:07:26	231.061		2024-05-22	00:15:49	2024-05-22 00:15:49	0.772
2024-03-27 03:08:45	207.411		2024-03-27 02:54:19	23.22		2024-05-22	01:07:56	2024-05-22 01:07:56	230.821		2024-05-22	00:16:19	2024-05-22 00:16:19	0.782
2024-03-27 03:09:15	207.529		2024-03-27 02:54:49	25.412		2024-05-22	01:08:26	2024-05-22 01:08:26	230.761		2024-05-22	00:16:49	2024-05-22 00:16:49	0.812
2024-03-27 03:09:45	207.452		2024-03-27 02:55:19	21.285		2024-05-22	01:08:56	2024-05-22 01:08:56	230.804		2024-05-22	00:17:19	2024-05-22 00:17:19	0.792
2024-03-27 03:10:15	206.214		2024-03-27 02:55:49	21.422		2024-05-22	01:09:26	2024-05-22 01:09:26	230.341		2024-05-22	00:17:49	2024-05-22 00:17:49	0.785
2024-03-27 03:10:45	207.391		2024-03-27 02:56:19	23.059		2024-05-22	01:09:56	2024-05-22 01:09:56	230.024		2024-05-22	00:18:19	2024-05-22 00:18:19	0.776
2024-03-27 03:11:15	206.513		2024-03-27 02:56:49	25.282		2024-05-22	01:10:26	2024-05-22 01:10:26	229.297		2024-05-22	00:18:49	2024-05-22 00:18:49	0.788
2024-03-27 03:11:45	206.218		2024-03-27 02:57:19	29.437		2024-05-22	01:10:56	2024-05-22 01:10:56	229.532		2024-05-22	00:19:19	2024-05-22 00:19:19	0.785
2024-03-27 03:12:15	206.174		2024-03-27 02:57:49	31.903		2024-05-22	01:11:26	2024-05-22 01:11:26	229.899		2024-05-22	00:19:49	2024-05-22 00:19:49	0.787
2024-03-27 03:12:45	206.984		2024-03-27 02:58:19	32.433		2024-05-22	01:11:56	2024-05-22 01:11:56	229.984		2024-05-22	00:20:19	2024-05-22 00:20:19	0.775
2024-03-27 03:13:15	207.538		2024-03-27 02:58:49	32.028		2024-05-22	01:12:26	2024-05-22 01:12:26	229.64		2024-05-22	00:20:49	2024-05-22 00:20:49	0.797
2024-03-27 03:13:45	207.328		2024-03-27 02:59:19	30.838		2024-05-22	01:12:56	2024-05-22 01:12:56	229.338		2024-05-22	00:21:19	2024-05-22 00:21:19	0.8
2024-03-27 03:14:15	206.642		2024-03-27 02:59:49	29.311		2024-05-22	01:13:26	2024-05-22 01:13:26	229.204		2024-05-22	00:21:49	2024-05-22 00:21:49	0.795
2024-03-27 03:14:45	207.785		2024-03-27 03:00:19	28.109		2024-05-22	01:13:56	2024-05-22 01:13:56	228.837		2024-05-22	00:22:19	2024-05-22 00:22:19	0.795
2024-03-27 03:15:15	208.944		2024-03-27 03:00:49	27.059		2024-05-22	01:14:26	2024-05-22 01:14:26	228.431		2024-05-22	00:22:49	2024-05-22 00:22:49	0.775
2024-03-27 03:15:45	206.414		2024-03-27 03:01:19	26.841		2024-05-22	01:14:56	2024-05-22 01:14:56	228.89		2024-05-22	00:23:19	2024-05-22 00:23:19	0.79
2024-03-27 03:16:15	206.405		2024-03-27 03:01:49	29.544		2024-05-22	01:15:26	2024-05-22 01:15:26	230.683		2024-05-22	00:23:49	2024-05-22 00:23:49	0.785
2024-03-27 03:16:45	207.113		2024-03-27 03:02:19	29.67		2024-05-22	01:15:56	2024-05-22 01:15:56	231.599		2024-05-22	00:24:19	2024-05-22 00:24:19	0.768
2024-03-27 03:17:15	207.405		2024-03-27 03:02:49	27.633		2024-05-22	01:16:26	2024-05-22 01:16:26	231.606		2024-05-22	00:24:49	2024-05-22 00:24:49	0.797
2024-03-27 03:17:45	207.059		2024-03-27 03:03:19	27.739		2024-05-22	01:16:56	2024-05-22 01:16:56	227.136		2024-05-22	00:25:19	2024-05-22 00:25:19	0.783
2024-03-27 03:18:15	206.752		2024-03-27 03:03:49	28.047		2024-05-22	01:17:26	2024-05-22 01:17:26	219.24		2024-05-22	00:25:49	2024-05-22 00:25:49	0.785
2024-03-27 03:18:45	207.007		2024-03-27 03:04:19	29.283		2024-05-22	01:17:56	2024-05-22 01:17:56	216.662		2024-05-22	00:26:19	2024-05-22 00:26:19	0.788
2024-03-27 03:19:15	206.135		2024-03-27 03:04:49	30.868		2024-05-22	01:18:26	2024-05-22 01:18:26	215.613		2024-05-22	00:26:49	2024-05-22 00:26:49	0.765
2024-03-27 03:19:45	206.959		2024-03-27 03:05:19	32.9		2024-05-22	01:18:56	2024-05-22 01:18:56	214.82		2024-05-22	00:27:19	2024-05-22 00:27:19	0.765
2024-03-27 03:20:15	207.081		2024-03-27 03:05:49	33.01		2024-05-22	01:19:26	2024-05-22 01:19:26	216.049		2024-05-22	00:27:49	2024-05-22 00:27:49	0.795
2024-03-27 03:20:45	207.434		2024-03-27 03:06:19	34.483		2024-05-22	01:19:56	2024-05-22 01:19:56	218.443		2024-05-22	00:28:19	2024-05-22 00:28:19	0.773
2024-03-27 03:21:15	207.974		2024-03-27 03:06:49	35.849		2024-05-22	01:20:26	2024-05-22 01:20:26	222.479		2024-05-22	00:28:49	2024-05-22 00:28:49	0.79
2024-03-27 03:21:45	207.797		2024-03-27 03:07:19	38.235		2024-05-22	01:20:56	2024-05-22 01:20:56	223.77		2024-05-22	00:29:19	2024-05-22 00:29:19	0.805
2024-03-27 03:22:15	208.001		2024-03-27 03:07:49	36.426		2024-05-22	01:21:26	2024-05-22 01:21:26	222.343		2024-05-22	00:29:49	2024-05-22 00:29:49	0.763
2024-03-27 03:22:45	207.095		2024-03-27 03:08:19	35.779		2024-05-22	01:21:56	2024-05-22 01:21:56	219.399		2024-05-22	00:30:19	2024-05-22 00:30:19	0.803
2024-03-27 03:23:15	207.348		2024-03-27 03:08:49	34.557		2024-05-22	01:22:26	2024-05-22 01:22:26	217.901		2024-05-22	00:30:49	2024-05-22 00:30:49	0.785
2024-03-27 03:23:45	207.509		2024-03-27 03:09:19	33.087		2024-05-22	01:22:56	2024-05-22 01:22:56	217.82		2024-05-22	00:31:19	2024-05-22 00:31:19	0.773
2024-03-27 03:24:15	207.364		2024-03-27 03:09:49	32.129		2024-05-22	01:23:26	2024-05-22 01:23:26	219.411		2024-05-22	00:31:49	2024-05-22 00:31:49	0.778
2024-03-27 03:24:45	207.502		2024-03-27 03:10:19	31.389		2024-05-22	01:23:56	2024-05-22 01:23:56	217.764		2024-05-22	00:32:19	2024-05-22 00:32:19	0.793
2024-03-27 03:25:15	208.356		2024-03-27 03:10:49	31.402		2024-05-22	01:24:26	2024-05-22 01:24:26	211.62		2024-05-22	00:32:49	2024-05-22 00:32:49	0.792
2024-03-27 03:25:45	208.142		2024-03-27 03:11:19	33.867		2024-05-22	01:24:56	2024-05-22 01:24:56	208.01		2024-05-22	00:33:19	2024-05-22 00:33:19	0.783
2024-03-27 03:26:15	207.892		2024-03-27 03:11:49	34.093		2024-05-22	01:25:26	2024-05-22 01:25:26	208.667		2024-05-22	00:33:49	2024-05-22 00:33:49	0.773
2024-03-27 03:26:45	208.762		2024-03-27 03:12:19	34.894		2024-05-22	01:25:56	2024-05-22 01:25:56	209.335		2024-05-22	00:34:19	2024-05-22 00:34:19	0.79
2024-03-27 03:27:15	208.748		2024-03-27 03:12:49	33.659		2024-05-22	01:26:26	2024-05-22 01:26:26	206.241		2024-05-22	00:34:49	2024-05-22 00:34:49	0.773
2024-03-27 03:27:45	208.894		2024-03-27 03:13:19	32.011		2024-05-22	01:26:56	2024-05-22 01:26:56	202.314		2024-05-22	00:35:19	2024-05-22 00:35:19	0.797
2024-03-27 03:28:15	208.062		2024-03-27 03:13:49	30.418		2024-05-22	01:27:26	2024-05-22 01:27:26	202.204		2024-05-22	00:35:49	2024-05-22 00:35:49	0.78
2024-03-27 03:28:45	206.815		2024-03-27 03:14:19	28.901		2024-05-22	01:27:56	2024-05-22 01:27:56	204.89		2024-05-22	00:36:19	2024-05-22 00:36:19	0.783
2024-03-27 03:29:15	205.228		2024-03-27 03:14:49	29.874		2024-05-22	01:28:26	2024-05-22 01:28:26	206.982		2024-05-22	00:36:49	2024-05-22 00:36:49	0.78
2024-03-27 03:29:45	207.883		2024-03-27 03:15:19	38.528		2024-05-22	01:28:56	2024-05-22 01:28:56	206.403		2024-05-22	00:37:19	2024-05-22 00:37:19	0.798
2024-03-27 03:30:15	208.288		2024-03-27 03:15:49	48.077		2024-05-22	01:29:26	2024-05-22 01:29:26	205.51		2024-05-22	00:37:49	2024-05-22 00:37:49	0.78
2024-03-27 03:30:45	208.285		2024-03-27 03:16:19	50.815		2024-05-22	01:29:56	2024-05-22 01:29:56	204.509		2024-05-22	00:38:19	2024-05-22 00:38:19	0.783
2024-03-27 03:31:15	208.782		2024-03-27 03:16:49	49.081		2024-05-22	01:30:26	2024-05-22 01:30:26	202.45		2024-05-22	00:38:49	2024-05-22 00:38:49	0.805
2024-03-27 03:31:45	208.515		2024-03-27 03:17:19	46.183		2024-05-22	01:30:56	2024-05-22 01:30:56	201.724		2024-05-22	00:39:19	2024-05-22 00:39:19	0.795
2024-03-27 03:32:15	209.139		2024-03-27 03:17:49	43.698		2024-05-22	01:31:26	2024-05-22 01:31:26	201.969		2024-05-22	00:39:49	2024-05-22 00:39:49	0.775
2024-03-27 03:32:45	208.798		2024-03-27 03:18:19	41.268		2024-05-22	01:31:56	2024-05-22 01:31:56	202.159		2024-05-22	00:40:19	2024-05-22 00:40:19	0.79
2024-03-27 03:33:15	206.711		2024-03-27 03:18:49	37.878		2024-05-22	01:32:26	2024-05-22 01:32:26	202.533		2024-05-22	00:40:49	2024-05-22 00:40:49	0.798
2024-03-27 03:33:45	205.962		2024-03-27 03:19:19	36.949		2024-05-22	01:32:56	2024-05-22 01:32:56	200.929		2024-05-22	00:41:19	2024-05-22 00:41:19	0.793
2024-03-27 03:34:15	207.301		2024-03-27 03:19:49	36.004		2024-05-22	01:33:26	2024-05-22 01:33:26	199.855		2024-05-22	00:41:49	2024-05-22 00:41:49	0.785
2024-03-27 03:34:45	208.388		2024-03-27 03:20:19	33.867		2024-05-22	01:33:56	2024-05-22 01:33:56	198.288		2024-05-22	00:42:19	2024-05-22 00:42:19	0.788
2024-03-27 03:35:15	206.84		2024-03-27 03:20:49	32.11		2024-05-22	01:34:26	2024-05-22 01:34:26	197.353		2024-05-22	00:42:49	2024-05-22 00:42:49	0.775
2024-03-27 03:35:45	207.695		2024-03-27 03:21:19	30.203		2024-05-22	01:34:56	2024-05-22 01:34:56	196.853		2024-05-22	00:43:19	2024-05-22 00:43:19	0.82
2024-03-27 03:36:15	208.862		2024-03-27 03:21:49	28.836		2024-05-22	01:35:26	2024-05-22 01:35:26	196.078		2024-05-22	00:43:49	2024-05-22 00:43:49	0.78
2024-03-27 03:36:45	208.969		2024-03-27 03:22:19	27.873		2024-05-22	01:35:56	2024-05-22 01:35:56	195.85		2024-05-22	00:44:19	2024-05-22 00:44:19	0.788
2024-03-27 03:37:15	207.638		2024-03-27 03:22:49	27.722		2024-05-22	01:36:26	2024-05-22 01:36:26	196.003		2024-05-22	00:44:49	2024-05-22 00:44:49	0.79
2024-03-27 03:37:45	208.169		2024-03-27 03:23:19	27.438		2024-05-22	01:36:56	2024-05-22 01:36:56	196.202		2024-05-22	00:45:19	2024-05-22 00:45:19	0.78
2024-03-27 03:38:15	207.654		2024-03-27 03:23:49	27.038		2024-05-22	01:37:26	2024-05-22 01:37:26	196.382		2024-05-22	00:45:49	2024-05-22 00:45:49	0.79
2024-03-27 03:38:45	209.027		2024-03-27 03:24:19	27.213		2024-05-22	01:37:56	2024-05-22 01:37:56	195.856		2024-05-22	00:46:19	2024-05-22 00:46:19	0.761
2024-03-27 03:39:15	207.799		2024-03-27 03:24:49	28.303		2024-05-22	01:38:26	2024-05-22 01:38:26	194.742		2024-05-22	00:46:49	2024-05-22 00:46:49	0.768
2024-03-27 03:39:45	209.047		2024-03-27 03:25:19	28.387		2024-05-22	01:38:56	2024-05-22 01:38:56	198.71		2024-05-22	00:47:19	2024-05-22 00:47:19	0.805
2024-03-27 03:40:15	207.965		2024-03-27 03:25:49	30.878		2024-05-22	01:39:26	2024-05-22 01:39:26	198.331		2024-05-22	00:47:49	2024-05-22 00:47:49	0.793
2024-03-27 03:40:45	207.461		2024-03-27 03:26:19	31.445		2024-05-22	01:39:56	2024-05-22 01:39:56	198.171		2024-05-22	00:48:19	2024-05-22 00:48:19	0.81
2024-03-27 03:41:15	208.447		2024-03-27 03:26:49	27.38		2024-05-22	01:40:26	2024-05-22 01:40:26	198.037		2024-05-22	00:48:49	2024-05-22 00:48:49	0.797
2024-03-27 03:41:45	208.042		2024-03-27 03:27:19	27.04		2024-05-22	01:40:56	2024-05-22 01:40:56	196.949		2024-05-22	00:49:19	2024-05-22 00:49:19	0.793
2024-03-27 03:42:15	208.75		2024-03-27 03:27:49	27.692		2024-05-22	01:41:26	2024-05-22 01:41:26	198.674		2024-05-22	00:49:49	2024-05-22 00:49:49	0.765
2024-03-27 03:42:45	206.885		2024-03-27 03:28:19	27.081		2024-05-22	01:41:56	2024-05-22 01:41:56	198.84		2024-05-22	00:50:19	2024-05-22 00:50:19	0.797
2024-03-27 03:43:15	207.686		2024-03-27 03:28:49	29.523		2024-05-22	01:42:26	2024-05-22 01:42:26	198.271		2024-05-22	00:50:49	2024-05-22 00:50:49	0.783
2024-03-27 03:43:45	208.374		2024-03-27 03:29:19	30.746		2024-05-22	01:42:56	2024-05-22 01:42:56	198.464		2024-05-22	00:51:19	2024-05-22 00:51:19	0.783
2024-03-27 03:44:15	209.116		2024-03-27 03:29:49	30.87		2024-05-22	01:43:26	2024-05-22 01:43:26	198.966		2024-05-22	00:51:49	2024-05-22 00:51:49	0.783
2024-03-27 03:44:45	209.088		2024-03-27 03:30:19	31.982		2024-05-22	01:43:56	2024-05-22 01:43:56	200.342		2024-05-22	00:52:19	2024-05-22 00:52:19	0.79
2024-03-27 03:45:15	209.159		2024-03-27 03:30:49	36.432		2024-05-22	01:44:26	2024-05-22 01:44:26	204.321		2024-05-22	00:52:49	2024-05-22 00:52:49	0.783
2024-03-27 03:45:45	209.157		2024-03-27 03:31:19	33.801		2024-05-22	01:44:56	2024-05-22 01:44:56	206.706		2024-05-22	00:53:19	2024-05-22 00:53:19	0.807
2024-03-27 03:46:15	208.889		2024-03-27 03:31:49	30.467		2024-05-22	01:45:26	2024-05-22 01:45:26	208.163		2024-05-22	00:53:49	2024-05-22 00:53:49	0.793
2024-03-27 03:46:45	209.418		2024-03-27 03:32:19	29.54		2024-05-22	01:45:56	2024-05-22 01:45:56	208.04		2024-05-22	00:54:19	2024-05-22 00:54:19	0.812
2024-03-27 03:47:15	209.422		2024-03-27 03:32:49	29.128		2024-05-22	01:46:26	2024-05-22 01:46:26	206.938		2024-05-22	00:54:49	2024-05-22 00:54:49	0.795
2024-03-27 03:47:45	208.778		2024-03-27 03:33:19	28.578		2024-05-22	01:46:56	2024-05-22 01:46:56	204.946		2024-05-22	00:55:19	2024-05-22 00:55:19	0.787
2024-03-27 03:48:15	207.199		2024-03-27 03:33:49	28.662		2024-05-22	01:47:26	2024-05-22 01:47:26	203.294		2024-05-22	00:55:49	2024-05-22 00:55:49	0.788
2024-03-27 03:48:45	207.699		2024-03-27 03:34:19	28.078		2024-05-22	01:47:56	2024-05-22 01:47:56	205.769		2024-05-22	00:56:19	2024-05-22 00:56:19	0.783
2024-03-27 03:49:15	209.31		2024-03-27 03:34:49	28.877		2024-05-22	01:48:26	2024-05-22 01:48:26	213.972		2024-05-22	00:56:49	2024-05-22 00:56:49	0.79
2024-03-27 03:49:45	206.342		2024-03-27 03:35:19	32.472		2024-05-22	01:48:56	2024-05-22 01:48:56	216.306		2024-05-22	00:57:19	2024-05-22 00:57:19	0.8
2024-03-27 03:50:15	208.511		2024-03-27 03:35:49	34.13		2024-05-22	01:49:26	2024-05-22 01:49:26	211.918		2024-05-22	00:57:49	2024-05-22 00:57:49	0.775
2024-03-27 03:50:45	209.808		2024-03-27 03:36:19	37.613		2024-05-22	01:49:56	2024-05-22 01:49:56	208.198		2024-05-22	00:58:19	2024-05-22 00:58:19	0.788
2024-03-27 03:51:15	209.157		2024-03-27 03:36:49	37.623		2024-05-22	01:50:26	2024-05-22 01:50:26	205.126		2024-05-22	00:58:49	2024-05-22 00:58:49	0.795
2024-03-27 03:51:45	209.759		2024-03-27 03:37:19	39.627		2024-05-22	01:50:56	2024-05-22 01:50:56	206.332		2024-05-22	00:59:19	2024-05-22 00:59:19	0.797
2024-03-27 03:52:15	209.693		2024-03-27 03:37:49	43.27		2024-05-22	01:51:26	2024-05-22 01:51:26	214.628		2024-05-22	00:59:49	2024-05-22 00:59:49	0.775
2024-03-27 03:52:45	208.901		2024-03-27 03:38:19	43.074		2024-05-22	01:51:56	2024-05-22 01:51:56	218.604		2024-05-22	01:00:19	2024-05-22 01:00:19	0.802
2024-03-27 03:53:15	209.736		2024-03-27 03:38:49	39.577		2024-05-22	01:52:26	2024-05-22 01:52:26	219.333		2024-05-22	01:00:49	2024-05-22 01:00:49	0.773
2024-03-27 03:53:45	209.553		2024-03-27 03:39:19	40.883		2024-05-22	01:52:56	2024-05-22 01:52:56	219.515		2024-05-22	01:01:19	2024-05-22 01:01:19	0.81
2024-03-27 03:54:15	209.285		2024-03-27 03:39:49	37.419		2024-05-22	01:53:26	2024-05-22 01:53:26	220.582		2024-05-22	01:01:49	2024-05-22 01:01:49	0.815
2024-03-27 03:54:45	208.037		2024-03-27 03:40:19	40.068		2024-05-22	01:53:56	2024-05-22 01:53:56	222.11		2024-05-22	01:02:19	2024-05-22 01:02:19	0.788
2024-03-27 03:55:15	208.862		2024-03-27 03:40:49	44.565		2024-05-22	01:54:26	2024-05-22 01:54:26	219.803		2024-05-22	01:02:49	2024-05-22 01:02:49	0.81
2024-03-27 03:55:45	208.855		2024-03-27 03:41:19	56.928		2024-05-22	01:54:56	2024-05-22 01:54:56	217.808		2024-05-22	01:03:19	2024-05-22 01:03:19	0.81
2024-03-27 03:56:15	208.727		2024-03-27 03:41:49	75.621		2024-05-22	01:55:26	2024-05-22 01:55:26	218.319		2024-05-22	01:03:49	2024-05-22 01:03:49	0.77
2024-03-27 03:56:45	208.256		2024-03-27 03:42:19	86.144		2024-05-22	01:55:56	2024-05-22 01:55:56	213.855		2024-05-22	01:04:19	2024-05-22 01:04:19	0.788
2024-03-27 03:57:15	208.714		2024-03-27 03:42:49	96.154		2024-05-22	01:56:26	2024-05-22 01:56:26	206.036		2024-05-22	01:04:49	2024-05-22 01:04:49	0.805
2024-03-27 03:57:45	208.09		2024-03-27 03:43:19	96.929		2024-05-22	01:56:56	2024-05-22 01:56:56	205.39		2024-05-22	01:05:19	2024-05-22 01:05:19	0.807
2024-03-27 03:58:15	208.356		2024-03-27 03:43:49	86.695		2024-05-22	01:57:26	2024-05-22 01:57:26	206.091		2024-05-22	01:05:49	2024-05-22 01:05:49	0.812
2024-03-27 03:58:45	208.981		2024-03-27 03:44:19	81.622		2024-05-22	01:57:56	2024-05-22 01:57:56	205.536		2024-05-22	01:06:19	2024-05-22 01:06:19	0.802
2024-03-27 03:59:15	208.686		2024-03-27 03:44:49	79.214		2024-05-22	01:58:26	2024-05-22 01:58:26	205.374		2024-05-22	01:06:49	2024-05-22 01:06:49	0.8
2024-03-27 03:59:45	209.157		2024-03-27 03:45:19	80.878		2024-05-22	01:58:56	2024-05-22 01:58:56	205.78		2024-05-22	01:07:19	2024-05-22 01:07:19	0.802
2024-03-27 04:00:15	209.383		2024-03-27 03:45:49	78.128		2024-05-22	01:59:26	2024-05-22 01:59:26	206.682		2024-05-22	01:07:49	2024-05-22 01:07:49	0.8
2024-03-27 04:00:45	209.054		2024-03-27 03:46:19	78.272		2024-05-22	01:59:56	2024-05-22 01:59:56	210.047		2024-05-22	01:08:19	2024-05-22 01:08:19	0.802
2024-03-27 04:01:15	208.793		2024-03-27 03:46:49	78.216		2024-05-22	02:00:26	2024-05-22 02:00:26	215.306		2024-05-22	01:08:49	2024-05-22 01:08:49	0.8
2024-03-27 04:01:45	209.505		2024-03-27 03:47:19	83.857		2024-05-22	02:00:56	2024-05-22 02:00:56	211.254		2024-05-22	01:09:19	2024-05-22 01:09:19	0.827
2024-03-27 04:02:15	208.679		2024-03-27 03:47:49	77.743		2024-05-22	02:01:26	2024-05-22 02:01:26	208.281		2024-05-22	01:09:49	2024-05-22 01:09:49	0.807
2024-03-27 04:02:45	208.133		2024-03-27 03:48:19	73.916		2024-05-22	02:01:56	2024-05-22 02:01:56	206.733		2024-05-22	01:10:19	2024-05-22 01:10:19	0.805
2024-03-27 04:03:15	209.702		2024-03-27 03:48:49	73.863		2024-05-22	02:02:26	2024-05-22 02:02:26	204.469		2024-05-22	01:10:49	2024-05-22 01:10:49	0.8
2024-03-27 04:03:45	208.422		2024-03-27 03:49:19	74.8		2024-05-22	02:02:56	2024-05-22 02:02:56	204.034		2024-05-22	01:11:19	2024-05-22 01:11:19	0.802
2024-03-27 04:04:15	209.775		2024-03-27 03:49:49	78.128		2024-05-22	02:03:26	2024-05-22 02:03:26	208.347		2024-05-22	01:11:49	2024-05-22 01:11:49	0.802
2024-03-27 04:04:45	208.356		2024-03-27 03:50:19	88.24		2024-05-22	02:03:56	2024-05-22 02:03:56	209.434		2024-05-22	01:12:19	2024-05-22 01:12:19	0.797
2024-03-27 04:05:15	207.265		2024-03-27 03:50:49	99.138		2024-05-22	02:04:26	2024-05-22 02:04:26	210.088		2024-05-22	01:12:49	2024-05-22 01:12:49	0.792
2024-03-27 04:05:45	208.351		2024-03-27 03:51:19	106.472		2024-05-22	02:04:56	2024-05-22 02:04:56	214.124		2024-05-22	01:13:19	2024-05-22 01:13:19	0.792
2024-03-27 04:06:15	209.104		2024-03-27 03:51:49	106.179		2024-05-22	02:05:26	2024-05-22 02:05:26	216.279		2024-05-22	01:13:49	2024-05-22 01:13:49	0.795
2024-03-27 04:06:45	207.274		2024-03-27 03:52:19	103.208		2024-05-22	02:05:56	2024-05-22 02:05:56	216.173		2024-05-22	01:14:19	2024-05-22 01:14:19	0.783
2024-03-27 04:07:15	208.024		2024-03-27 03:52:49	100.262		2024-05-22	02:06:26	2024-05-22 02:06:26	215.856		2024-05-22	01:14:49	2024-05-22 01:14:49	0.792
2024-03-27 04:07:45	207.908		2024-03-27 03:53:19	96.712		2024-05-22	02:06:56	2024-05-22 02:06:56	216.466		2024-05-22	01:15:19	2024-05-22 01:15:19	0.802
2024-03-27 04:08:15	208.844		2024-03-27 03:53:49	95.319		2024-05-22	02:07:26	2024-05-22 02:07:26	218.546		2024-05-22	01:15:49	2024-05-22 01:15:49	0.795
2024-03-27 04:08:45	209.61		2024-03-27 03:54:19	97.65		2024-05-22	02:07:56	2024-05-22 02:07:56	221.459		2024-05-22	01:16:19	2024-05-22 01:16:19	0.815
2024-03-27 04:09:15	209.688		2024-03-27 03:54:49	101.8		2024-05-22	02:08:26	2024-05-22 02:08:26	218.1		2024-05-22	01:16:49	2024-05-22 01:16:49	0.79
2024-03-27 04:09:45	208.513		2024-03-27 03:55:19	102.279		2024-05-22	02:08:56	2024-05-22 02:08:56	211.965		2024-05-22	01:17:19	2024-05-22 01:17:19	0.807
2024-03-27 04:10:15	209.957		2024-03-27 03:55:49	104.41		2024-05-22	02:09:26	2024-05-22 02:09:26	210.143		2024-05-22	01:17:49	2024-05-22 01:17:49	0.805
2024-03-27 04:10:45	208.611		2024-03-27 03:56:19	106.776		2024-05-22	02:09:56	2024-05-22 02:09:56	211.383		2024-05-22	01:18:19	2024-05-22 01:18:19	0.782
2024-03-27 04:11:15	208.871		2024-03-27 03:56:49	113.491		2024-05-22	02:10:26	2024-05-22 02:10:26	213.083		2024-05-22	01:18:49	2024-05-22 01:18:49	0.782
2024-03-27 04:11:45	208.335		2024-03-27 03:57:19	118.765		2024-05-22	02:10:56	2024-05-22 02:10:56	214.685		2024-05-22	01:19:19	2024-05-22 01:19:19	0.79
2024-03-27 04:12:15	208.19		2024-03-27 03:57:49	124.62		2024-05-22	02:11:26	2024-05-22 02:11:26	215.583		2024-05-22	01:19:49	2024-05-22 01:19:49	0.79
2024-03-27 04:12:45	208.618		2024-03-27 03:58:19	130.08		2024-05-22	02:11:56	2024-05-22 02:11:56	209.786		2024-05-22	01:20:19	2024-05-22 01:20:19	0.8
2024-03-27 04:13:15	209.431		2024-03-27 03:58:49	129.995		2024-05-22	02:12:26	2024-05-22 02:12:26	204.783		2024-05-22	01:20:49	2024-05-22 01:20:49	0.79
2024-03-27 04:13:45	209.036		2024-03-27 03:59:19	131.103		2024-05-22	02:12:56	2024-05-22 02:12:56	204.862		2024-05-22	01:21:19	2024-05-22 01:21:19	0.817
2024-03-27 04:14:15	208.883		2024-03-27 03:59:49	130.64		2024-05-22	02:13:26	2024-05-22 02:13:26	205.192		2024-05-22	01:21:49	2024-05-22 01:21:49	0.809
2024-03-27 04:14:45	209.59		2024-03-27 04:00:19	130.992		2024-05-22	02:13:56	2024-05-22 02:13:56	206.761		2024-05-22	01:22:19	2024-05-22 01:22:19	0.785
2024-03-27 04:15:15	208.463		2024-03-27 04:00:49	131.367		2024-05-22	02:14:26	2024-05-22 02:14:26	214.507		2024-05-22	01:22:49	2024-05-22 01:22:49	0.787
2024-03-27 04:15:45	208.131		2024-03-27 04:01:19	128.702		2024-05-22	02:14:56	2024-05-22 02:14:56	220.084		2024-05-22	01:23:19	2024-05-22 01:23:19	0.8
2024-03-27 04:16:15	208.885		2024-03-27 04:01:49	127.124		2024-05-22	02:15:26	2024-05-22 02:15:26	217.007		2024-05-22	01:23:49	2024-05-22 01:23:49	0.812
2024-03-27 04:16:45	209.564		2024-03-27 04:02:19	124.847		2024-05-22	02:15:56	2024-05-22 02:15:56	211.217		2024-05-22	01:24:19	2024-05-22 01:24:19	0.802
2024-03-27 04:17:15	209.193		2024-03-27 04:02:49	124.844		2024-05-22	02:16:26	2024-05-22 02:16:26	209.133		2024-05-22	01:24:49	2024-05-22 01:24:49	0.809
2024-03-27 04:17:45	208.401		2024-03-27 04:03:19	133.147		2024-05-22	02:16:56	2024-05-22 02:16:56	210.949		2024-05-22	01:25:19	2024-05-22 01:25:19	0.792
2024-03-27 04:18:15	209.004		2024-03-27 04:03:49	138.063		2024-05-22	02:17:26	2024-05-22 02:17:26	217.973		2024-05-22	01:25:49	2024-05-22 01:25:49	0.812
2024-03-27 04:18:45	209.228		2024-03-27 04:04:19	143.158		2024-05-22	02:17:56	2024-05-22 02:17:56	222.077		2024-05-22	01:26:19	2024-05-22 01:26:19	0.785
2024-03-27 04:19:15	208.72		2024-03-27 04:04:49	145.41		2024-05-22	02:18:26	2024-05-22 02:18:26	224.388		2024-05-22	01:26:49	2024-05-22 01:26:49	0.804
2024-03-27 04:19:45	208.581		2024-03-27 04:05:19	143.726		2024-05-22	02:18:56	2024-05-22 02:18:56	221.639		2024-05-22	01:27:19	2024-05-22 01:27:19	0.792
2024-03-27 04:20:15	208.397		2024-03-27 04:05:49	140.206		2024-05-22	02:19:26	2024-05-22 02:19:26	216.654		2024-05-22	01:27:49	2024-05-22 01:27:49	0.802
2024-03-27 04:20:45	208.812		2024-03-27 04:06:19	139.526		2024-05-22	02:19:56	2024-05-22 02:19:56	214.097		2024-05-22	01:28:19	2024-05-22 01:28:19	0.804
2024-03-27 04:21:15	209.013		2024-03-27 04:06:49	138.408		2024-05-22	02:20:26	2024-05-22 02:20:26	212.94		2024-05-22	01:28:49	2024-05-22 01:28:49	0.802
2024-03-27 04:21:45	209.812		2024-03-27 04:07:19	138.528		2024-05-22	02:20:56	2024-05-22 02:20:56	215.002		2024-05-22	01:29:19	2024-05-22 01:29:19	0.826
2024-03-27 04:22:15	209.546		2024-03-27 04:07:49	138.393		2024-05-22	02:21:26	2024-05-22 02:21:26	221.703		2024-05-22	01:29:49	2024-05-22 01:29:49	0.782
2024-03-27 04:22:45	209.223		2024-03-27 04:08:19	144.344		2024-05-22	02:21:56	2024-05-22 02:21:56	221.778		2024-05-22	01:30:19	2024-05-22 01:30:19	0.819
2024-03-27 04:23:15	209.459		2024-03-27 04:08:49	152.727		2024-05-22	02:22:26	2024-05-22 02:22:26	221.762		2024-05-22	01:30:49	2024-05-22 01:30:49	0.802
2024-03-27 04:23:45	209.814		2024-03-27 04:09:19	156.073		2024-05-22	02:22:56	2024-05-22 02:22:56	222.942		2024-05-22	01:31:19	2024-05-22 01:31:19	0.822
2024-03-27 04:24:15	208.62		2024-03-27 04:09:49	154.401		2024-05-22	02:23:26	2024-05-22 02:23:26	223.923		2024-05-22	01:31:49	2024-05-22 01:31:49	0.797
2024-03-27 04:24:45	208.404		2024-03-27 04:10:19	155.788		2024-05-22	02:23:56	2024-05-22 02:23:56	223.628		2024-05-22	01:32:19	2024-05-22 01:32:19	0.794
2024-03-27 04:25:15	209.095		2024-03-27 04:10:49	159.723		2024-05-22	02:24:26	2024-05-22 02:24:26	222.751		2024-05-22	01:32:49	2024-05-22 01:32:49	0.794
2024-03-27 04:25:45	209.869		2024-03-27 04:11:19	163.538		2024-05-22	02:24:56	2024-05-22 02:24:56	221.833		2024-05-22	01:33:19	2024-05-22 01:33:19	0.802
2024-03-27 04:26:15	210.686		2024-03-27 04:11:49	162.04		2024-05-22	02:25:26	2024-05-22 02:25:26	220.391		2024-05-22	01:33:49	2024-05-22 01:33:49	0.792
2024-03-27 04:26:45	210.143		2024-03-27 04:12:19	159.224		2024-05-22	02:25:56	2024-05-22 02:25:56	218.073		2024-05-22	01:34:19	2024-05-22 01:34:19	0.807
2024-03-27 04:27:15	209.347		2024-03-27 04:12:49	155.289		2024-05-22	02:26:26	2024-05-22 02:26:26	210.856		2024-05-22	01:34:49	2024-05-22 01:34:49	0.804
2024-03-27 04:27:45	211.515		2024-03-27 04:13:19	150.233		2024-05-22	02:26:56	2024-05-22 02:26:56	218.571		2024-05-22	01:35:19	2024-05-22 01:35:19	0.814
2024-03-27 04:28:15	206.996		2024-03-27 04:13:49	147.955		2024-05-22	02:27:26	2024-05-22 02:27:26	225.912		2024-05-22	01:35:49	2024-05-22 01:35:49	0.79
2024-03-27 04:28:45	210.954		2024-03-27 04:14:19	145.502		2024-05-22	02:27:56	2024-05-22 02:27:56	227.419		2024-05-22	01:36:19	2024-05-22 01:36:19	0.817
2024-03-27 04:29:15	209.248		2024-03-27 04:14:49	147.406		2024-05-22	02:28:26	2024-05-22 02:28:26	226.535		2024-05-22	01:36:49	2024-05-22 01:36:49	0.799
2024-03-27 04:29:45	209.803		2024-03-27 04:15:19	153.028		2024-05-22	02:28:56	2024-05-22 02:28:56	224.777		2024-05-22	01:37:19	2024-05-22 01:37:19	0.822
2024-03-27 04:30:15	208.5		2024-03-27 04:15:49	152.711		2024-05-22	02:29:26	2024-05-22 02:29:26	221.107		2024-05-22	01:37:49	2024-05-22 01:37:49	0.797
2024-03-27 04:30:45	209.001		2024-03-27 04:16:19	153.741		2024-05-22	02:29:56	2024-05-22 02:29:56	219.606		2024-05-22	01:38:19	2024-05-22 01:38:19	0.819
2024-03-27 04:31:15	209.626		2024-03-27 04:16:49	158.642		2024-05-22	02:30:26	2024-05-22 02:30:26	220.157		2024-05-22	01:38:49	2024-05-22 01:38:49	0.802
2024-03-27 04:31:45	209.234		2024-03-27 04:17:19	158.422		2024-05-22	02:30:56	2024-05-22 02:30:56	219.339		2024-05-22	01:39:19	2024-05-22 01:39:19	0.817
2024-03-27 04:32:15	210.111		2024-03-27 04:17:49	155.938		2024-05-22	02:31:26	2024-05-22 02:31:26	218.876		2024-05-22	01:39:49	2024-05-22 01:39:49	0.812
2024-03-27 04:32:45	209.966		2024-03-27 04:18:19	154.192		2024-05-22	02:31:56	2024-05-22 02:31:56	219.764		2024-05-22	01:40:19	2024-05-22 01:40:19	0.812
2024-03-27 04:33:15	210.14		2024-03-27 04:18:49	151.056		2024-05-22	02:32:26	2024-05-22 02:32:26	223.719		2024-05-22	01:40:49	2024-05-22 01:40:49	0.79
2024-03-27 04:33:45	210.175		2024-03-27 04:19:19	150.155		2024-05-22	02:32:56	2024-05-22 02:32:56	225.969		2024-05-22	01:41:19	2024-05-22 01:41:19	0.792
2024-03-27 04:34:15	208.894		2024-03-27 04:19:49	148.272		2024-05-22	02:33:26	2024-05-22 02:33:26	226.191		2024-05-22	01:41:49	2024-05-22 01:41:49	0.797
2024-03-27 04:34:45	210.101		2024-03-27 04:20:19	146.409		2024-05-22	02:33:56	2024-05-22 02:33:56	226.313		2024-05-22	01:42:19	2024-05-22 01:42:19	0.81
2024-03-27 04:35:15	209.973		2024-03-27 04:20:49	145.1		2024-05-22	02:34:26	2024-05-22 02:34:26	224.407		2024-05-22	01:42:49	2024-05-22 01:42:49	0.802
2024-03-27 04:35:45	209.927		2024-03-27 04:21:19	145.313		2024-05-22	02:34:56	2024-05-22 02:34:56	221.251		2024-05-22	01:43:19	2024-05-22 01:43:19	0.805
2024-03-27 04:36:15	208.974		2024-03-27 04:21:49	148.745		2024-05-22	02:35:26	2024-05-22 02:35:26	219.73		2024-05-22	01:43:49	2024-05-22 01:43:49	0.802
2024-03-27 04:36:45	206.58		2024-03-27 04:22:19	154.993		2024-05-22	02:35:56	2024-05-22 02:35:56	219.151		2024-05-22	01:44:19	2024-05-22 01:44:19	0.817
2024-03-27 04:37:15	207.367		2024-03-27 04:22:49	158.044		2024-05-22	02:36:26	2024-05-22 02:36:26	221.105		2024-05-22	01:44:49	2024-05-22 01:44:49	0.79
2024-03-27 04:37:45	208.65		2024-03-27 04:23:19	164.66		2024-05-22	02:36:56	2024-05-22 02:36:56	222.196		2024-05-22	01:45:19	2024-05-22 01:45:19	0.797
2024-03-27 04:38:15	209.106		2024-03-27 04:23:49	167.999		2024-05-22	02:37:26	2024-05-22 02:37:26	221.494		2024-05-22	01:45:49	2024-05-22 01:45:49	0.81
2024-03-27 04:38:45	208.892		2024-03-27 04:24:19	167.519		2024-05-22	02:37:56	2024-05-22 02:37:56	220.398		2024-05-22	01:46:19	2024-05-22 01:46:19	0.8
2024-03-27 04:39:15	208.864		2024-03-27 04:24:49	165.735		2024-05-22	02:38:26	2024-05-22 02:38:26	221.599		2024-05-22	01:46:49	2024-05-22 01:46:49	0.815
2024-03-27 04:39:45	208.511		2024-03-27 04:25:19	161.077		2024-05-22	02:38:56	2024-05-22 02:38:56	224.745		2024-05-22	01:47:19	2024-05-22 01:47:19	0.824
2024-03-27 04:40:15	207.931		2024-03-27 04:25:49	156.443		2024-05-22	02:39:26	2024-05-22 02:39:26	222.537		2024-05-22	01:47:49	2024-05-22 01:47:49	0.81
2024-03-27 04:40:45	207.725		2024-03-27 04:26:19	155.714		2024-05-22	02:39:56	2024-05-22 02:39:56	224.02		2024-05-22	01:48:19	2024-05-22 01:48:19	0.8
2024-03-27 04:41:15	206.672		2024-03-27 04:26:49	159.31		2024-05-22	02:40:26	2024-05-22 02:40:26	224.58		2024-05-22	01:48:49	2024-05-22 01:48:49	0.783
2024-03-27 04:41:45	207.256		2024-03-27 04:27:19	160.115		2024-05-22	02:40:56	2024-05-22 02:40:56	223.636		2024-05-22	01:49:19	2024-05-22 01:49:19	0.8
2024-03-27 04:42:15	206.677		2024-03-27 04:27:49	162.585		2024-05-22	02:41:26	2024-05-22 02:41:26	221.742		2024-05-22	01:49:49	2024-05-22 01:49:49	0.807
2024-03-27 04:42:45	205.877		2024-03-27 04:28:19	161.213		2024-05-22	02:41:56	2024-05-22 02:41:56	222.456		2024-05-22	01:50:19	2024-05-22 01:50:19	0.807
2024-03-27 04:43:15	206.303		2024-03-27 04:28:49	160.39		2024-05-22	02:42:26	2024-05-22 02:42:26	220.661		2024-05-22	01:50:49	2024-05-22 01:50:49	0.797
2024-03-27 04:43:45	207.322		2024-03-27 04:29:19	162.384		2024-05-22	02:42:56	2024-05-22 02:42:56	217.12		2024-05-22	01:51:19	2024-05-22 01:51:19	0.79
2024-03-27 04:44:15	206.56		2024-03-27 04:29:49	167.21		2024-05-22	02:43:26	2024-05-22 02:43:26	211.739		2024-05-22	01:51:49	2024-05-22 01:51:49	0.817
2024-03-27 04:44:45	207.166		2024-03-27 04:30:19	167.348		2024-05-22	02:43:56	2024-05-22 02:43:56	207.302		2024-05-22	01:52:19	2024-05-22 01:52:19	0.814
2024-03-27 04:45:15	206.398		2024-03-27 04:30:49	166.418		2024-05-22	02:44:26	2024-05-22 02:44:26	202.656		2024-05-22	01:52:49	2024-05-22 01:52:49	0.817
2024-03-27 04:45:45	206.972		2024-03-27 04:31:19	162.745		2024-05-22	02:44:56	2024-05-22 02:44:56	206.533		2024-05-22	01:53:19	2024-05-22 01:53:19	0.797
2024-03-27 04:46:15	205.442		2024-03-27 04:31:49	159.198		2024-05-22	02:45:26	2024-05-22 02:45:26	207.441		2024-05-22	01:53:49	2024-05-22 01:53:49	0.812
2024-03-27 04:46:45	204.247		2024-03-27 04:32:19	161.013		2024-05-22	02:45:56	2024-05-22 02:45:56	213.298		2024-05-22	01:54:19	2024-05-22 01:54:19	0.81
2024-03-27 04:47:15	203.6		2024-03-27 04:32:49	164.564		2024-05-22	02:46:26	2024-05-22 02:46:26	220.482		2024-05-22	01:54:49	2024-05-22 01:54:49	0.81
2024-03-27 04:47:45	203.845		2024-03-27 04:33:19	163.928		2024-05-22	02:46:56	2024-05-22 02:46:56	222.118		2024-05-22	01:55:19	2024-05-22 01:55:19	0.802
2024-03-27 04:48:15	202.92		2024-03-27 04:33:49	167.086		2024-05-22	02:47:26	2024-05-22 02:47:26	222.534		2024-05-22	01:55:49	2024-05-22 01:55:49	0.812
2024-03-27 04:48:45	202.676		2024-03-27 04:34:19	167.656		2024-05-22	02:47:56	2024-05-22 02:47:56	222.9		2024-05-22	01:56:19	2024-05-22 01:56:19	0.814
2024-03-27 04:49:15	203.044		2024-03-27 04:34:49	166.617		2024-05-22	02:48:26	2024-05-22 02:48:26	223.145		2024-05-22	01:56:49	2024-05-22 01:56:49	0.819
2024-03-27 04:49:45	203.33		2024-03-27 04:35:19	167.042		2024-05-22	02:48:56	2024-05-22 02:48:56	223.55		2024-05-22	01:57:19	2024-05-22 01:57:19	0.787
2024-03-27 04:50:15	202.474		2024-03-27 04:35:49	162.128		2024-05-22	02:49:26	2024-05-22 02:49:26	224.418		2024-05-22	01:57:49	2024-05-22 01:57:49	0.805
2024-03-27 04:50:45	201.413		2024-03-27 04:36:19	156.069		2024-05-22	02:49:56	2024-05-22 02:49:56	224.636		2024-05-22	01:58:19	2024-05-22 01:58:19	0.795
2024-03-27 04:51:15	202.268		2024-03-27 04:36:49	150.471		2024-05-22	02:50:26	2024-05-22 02:50:26	224.091		2024-05-22	01:58:49	2024-05-22 01:58:49	0.824
2024-03-27 04:51:45	204.373		2024-03-27 04:37:19	145.922		2024-05-22	02:50:56	2024-05-22 02:50:56	225.123		2024-05-22	01:59:19	2024-05-22 01:59:19	0.812
2024-03-27 04:52:15	203.713		2024-03-27 04:37:49	144.262		2024-05-22	02:51:26	2024-05-22 02:51:26	225.437		2024-05-22	01:59:49	2024-05-22 01:59:49	0.805
2024-03-27 04:52:45	203.027		2024-03-27 04:38:19	145.219		2024-05-22	02:51:56	2024-05-22 02:51:56	225.593		2024-05-22	02:00:19	2024-05-22 02:00:19	0.815
2024-03-27 04:53:15	204.065		2024-03-27 04:38:49	151.644		2024-05-22	02:52:26	2024-05-22 02:52:26	226.052		2024-05-22	02:00:49	2024-05-22 02:00:49	0.805
2024-03-27 04:53:45	203.83		2024-03-27 04:39:19	158.684		2024-05-22	02:52:56	2024-05-22 02:52:56	225.973		2024-05-22	02:01:19	2024-05-22 02:01:19	0.807
2024-03-27 04:54:15	203.481		2024-03-27 04:39:49	157.368		2024-05-22	02:53:26	2024-05-22 02:53:26	226.513		2024-05-22	02:01:49	2024-05-22 02:01:49	0.805
2024-03-27 04:54:45	202.548		2024-03-27 04:40:19	156.992		2024-05-22	02:53:56	2024-05-22 02:53:56	226.867		2024-05-22	02:02:19	2024-05-22 02:02:19	0.807
2024-03-27 04:55:15	203.274		2024-03-27 04:40:49	161.626		2024-05-22	02:54:26	2024-05-22 02:54:26	226.383		2024-05-22	02:02:49	2024-05-22 02:02:49	0.807
2024-03-27 04:55:45	203.941		2024-03-27 04:41:19	157.794		2024-05-22	02:54:56	2024-05-22 02:54:56	226.965		2024-05-22	02:03:19	2024-05-22 02:03:19	0.817
2024-03-27 04:56:15	204.509		2024-03-27 04:41:49	165.238		2024-05-22	02:55:26	2024-05-22 02:55:26	226.792		2024-05-22	02:03:49	2024-05-22 02:03:49	0.81
2024-03-27 04:56:45	205.754		2024-03-27 04:42:19	164.299		2024-05-22	02:55:56	2024-05-22 02:55:56	226.659		2024-05-22	02:04:19	2024-05-22 02:04:19	0.8
2024-03-27 04:57:15	205.461		2024-03-27 04:42:49	158.909		2024-05-22	02:56:26	2024-05-22 02:56:26	225.155		2024-05-22	02:04:49	2024-05-22 02:04:49	0.812
2024-03-27 04:57:45	203.866		2024-03-27 04:43:19	150.583		2024-05-22	02:56:56	2024-05-22 02:56:56	224.523		2024-05-22	02:05:19	2024-05-22 02:05:19	0.822
2024-03-27 04:58:15	203.402		2024-03-27 04:43:49	154.084		2024-05-22	02:57:26	2024-05-22 02:57:26	222.598		2024-05-22	02:05:49	2024-05-22 02:05:49	0.812
2024-03-27 04:58:45	203.321		2024-03-27 04:44:19	158.29		2024-05-22	02:57:56	2024-05-22 02:57:56	223.719		2024-05-22	02:06:19	2024-05-22 02:06:19	0.81
2024-03-27 04:59:15	203.327		2024-03-27 04:44:49	157.471		2024-05-22	02:58:26	2024-05-22 02:58:26	223.536		2024-05-22	02:06:49	2024-05-22 02:06:49	0.805
2024-03-27 04:59:45	205.314		2024-03-27 04:45:19	157.87		2024-05-22	02:58:56	2024-05-22 02:58:56	223.354		2024-05-22	02:07:19	2024-05-22 02:07:19	0.812
2024-03-27 05:00:15	203.378		2024-03-27 04:45:49	157.621		2024-05-22	02:59:26	2024-05-22 02:59:26	223.622		2024-05-22	02:07:49	2024-05-22 02:07:49	0.822
2024-03-27 05:00:45	203.719		2024-03-27 04:46:19	159.423		2024-05-22	02:59:56	2024-05-22 02:59:56	222.871		2024-05-22	02:08:19	2024-05-22 02:08:19	0.81
2024-03-27 05:01:15	203.336		2024-03-27 04:46:49	158.607		2024-05-22	03:00:26	2024-05-22 03:00:26	220.153		2024-05-22	02:08:49	2024-05-22 02:08:49	0.81
2024-03-27 05:01:45	204.181		2024-03-27 04:47:19	159.046		2024-05-22	03:00:56	2024-05-22 03:00:56	218.632		2024-05-22	02:09:19	2024-05-22 02:09:19	0.822
2024-03-27 05:02:15	204.157		2024-03-27 04:47:49	157.19		2024-05-22	03:01:26	2024-05-22 03:01:26	220.209		2024-05-22	02:09:49	2024-05-22 02:09:49	0.797
2024-03-27 05:02:45	205.125		2024-03-27 04:48:19	155.972		2024-05-22	03:01:56	2024-05-22 03:01:56	220.024		2024-05-22	02:10:19	2024-05-22 02:10:19	0.81
2024-03-27 05:03:15	205.277		2024-03-27 04:48:49	156.471		2024-05-22	03:02:26	2024-05-22 03:02:26	215.233		2024-05-22	02:10:49	2024-05-22 02:10:49	0.812
2024-03-27 05:03:45	204.344		2024-03-27 04:49:19	157.536		2024-05-22	03:02:56	2024-05-22 03:02:56	216.123		2024-05-22	02:11:19	2024-05-22 02:11:19	0.824
2024-03-27 05:04:15	204.12		2024-03-27 04:49:49	158.642		2024-05-22	03:03:26	2024-05-22 03:03:26	215.498		2024-05-22	02:11:49	2024-05-22 02:11:49	0.797
2024-03-27 05:04:45	204.626		2024-03-27 04:50:19	159.081		2024-05-22	03:03:56	2024-05-22 03:03:56	216.547		2024-05-22	02:12:19	2024-05-22 02:12:19	0.839
2024-03-27 05:05:15	204.671		2024-03-27 04:50:49	158.904		2024-05-22	03:04:26	2024-05-22 03:04:26	217.6		2024-05-22	02:12:49	2024-05-22 02:12:49	0.792
2024-03-27 05:05:45	204.767		2024-03-27 04:51:19	162.059		2024-05-22	03:04:56	2024-05-22 03:04:56	219.723		2024-05-22	02:13:19	2024-05-22 02:13:19	0.825
2024-03-27 05:06:15	203.904		2024-03-27 04:51:49	161.576		2024-05-22	03:05:26	2024-05-22 03:05:26	217.413		2024-05-22	02:13:49	2024-05-22 02:13:49	0.825
2024-03-27 05:06:45	204.491		2024-03-27 04:52:19	164.579		2024-05-22	03:05:56	2024-05-22 03:05:56	216.906		2024-05-22	02:14:19	2024-05-22 02:14:19	0.813
2024-03-27 05:07:15	203.948		2024-03-27 04:52:49	163.301		2024-05-22	03:06:26	2024-05-22 03:06:26	217.602		2024-05-22	02:14:49	2024-05-22 02:14:49	0.825
2024-03-27 05:07:45	204.454		2024-03-27 04:53:19	164.536		2024-05-22	03:06:56	2024-05-22 03:06:56	218.563		2024-05-22	02:15:19	2024-05-22 02:15:19	0.808
2024-03-27 05:08:15	204.423		2024-03-27 04:53:49	163.202		2024-05-22	03:07:26	2024-05-22 03:07:26	220.127		2024-05-22	02:15:49	2024-05-22 02:15:49	0.825
2024-03-27 05:08:45	204.367		2024-03-27 04:54:19	163.955		2024-05-22	03:07:56	2024-05-22 03:07:56	215.414		2024-05-22	02:16:19	2024-05-22 02:16:19	0.83
2024-03-27 05:09:15	204.002		2024-03-27 04:54:49	164.139		2024-05-22	03:08:26	2024-05-22 03:08:26	215.505		2024-05-22	02:16:49	2024-05-22 02:16:49	0.815
2024-03-27 05:09:45	204.759		2024-03-27 04:55:19	159.056		2024-05-22	03:08:56	2024-05-22 03:08:56	217.018		2024-05-22	02:17:19	2024-05-22 02:17:19	0.81
2024-03-27 05:10:15	203.913		2024-03-27 04:55:49	161.371		2024-05-22	03:09:26	2024-05-22 03:09:26	213.031		2024-05-22	02:17:49	2024-05-22 02:17:49	0.837
2024-03-27 05:10:45	203.787		2024-03-27 04:56:19	162.66		2024-05-22	03:09:56	2024-05-22 03:09:56	215.843		2024-05-22	02:18:19	2024-05-22 02:18:19	0.817
2024-03-27 05:11:15	203.745		2024-03-27 04:56:49	159.75		2024-05-22	03:10:26	2024-05-22 03:10:26	218.584		2024-05-22	02:18:49	2024-05-22 02:18:49	0.82
2024-03-27 05:11:45	202.086		2024-03-27 04:57:19	157.199		2024-05-22	03:10:56	2024-05-22 03:10:56	218.811		2024-05-22	02:19:19	2024-05-22 02:19:19	0.83
2024-03-27 05:12:15	203.048		2024-03-27 04:57:49	159.728		2024-05-22	03:11:26	2024-05-22 03:11:26	217.165		2024-05-22	02:19:49	2024-05-22 02:19:49	0.805
2024-03-27 05:12:45	202.659		2024-03-27 04:58:19	158.763		2024-05-22	03:11:56	2024-05-22 03:11:56	217.712		2024-05-22	02:20:19	2024-05-22 02:20:19	0.8
2024-03-27 05:13:15	204.055		2024-03-27 04:58:49	163.397		2024-05-22	03:12:26	2024-05-22 03:12:26	216.185		2024-05-22	02:20:49	2024-05-22 02:20:49	0.817
2024-03-27 05:13:45	203.622		2024-03-27 04:59:19	161.548		2024-05-22	03:12:56	2024-05-22 03:12:56	213.018		2024-05-22	02:21:19	2024-05-22 02:21:19	0.803
2024-03-27 05:14:15	201.848		2024-03-27 04:59:49	161.369		2024-05-22	03:13:26	2024-05-22 03:13:26	214.903		2024-05-22	02:21:49	2024-05-22 02:21:49	0.812
2024-03-27 05:14:45	200.795		2024-03-27 05:00:19	159.061		2024-05-22	03:13:56	2024-05-22 03:13:56	216.475		2024-05-22	02:22:19	2024-05-22 02:22:19	0.817
2024-03-27 05:15:15	201.27		2024-03-27 05:00:49	159.097		2024-05-22	03:14:26	2024-05-22 03:14:26	217.281		2024-05-22	02:22:49	2024-05-22 02:22:49	0.808
2024-03-27 05:15:45	200.815		2024-03-27 05:01:19	159.949		2024-05-22	03:14:56	2024-05-22 03:14:56	216.995		2024-05-22	02:23:19	2024-05-22 02:23:19	0.81
2024-03-27 05:16:15	200.288		2024-03-27 05:01:49	159.959		2024-05-22	03:15:26	2024-05-22 03:15:26	215.118		2024-05-22	02:23:49	2024-05-22 02:23:49	0.812
2024-03-27 05:16:45	201.623		2024-03-27 05:02:19	150.965		2024-05-22	03:15:56	2024-05-22 03:15:56	215.531		2024-05-22	02:24:19	2024-05-22 02:24:19	0.82
2024-03-27 05:17:15	203.718		2024-03-27 05:02:49	155.715		2024-05-22	03:16:26	2024-05-22 03:16:26	217.07		2024-05-22	02:24:49	2024-05-22 02:24:49	0.82
2024-03-27 05:17:45	202.549		2024-03-27 05:03:19	158.987		2024-05-22	03:16:56	2024-05-22 03:16:56	217.44		2024-05-22	02:25:19	2024-05-22 02:25:19	0.827
2024-03-27 05:18:15	202.775		2024-03-27 05:03:49	155.395		2024-05-22	03:17:26	2024-05-22 03:17:26	214.59		2024-05-22	02:25:49	2024-05-22 02:25:49	0.825
2024-03-27 05:18:45	203.162		2024-03-27 05:04:19	153.408		2024-05-22	03:17:56	2024-05-22 03:17:56	214.672		2024-05-22	02:26:19	2024-05-22 02:26:19	0.793
2024-03-27 05:19:15	204.785		2024-03-27 05:04:49	149.349		2024-05-22	03:18:26	2024-05-22 03:18:26	215.587		2024-05-22	02:26:49	2024-05-22 02:26:49	0.837
2024-03-27 05:19:45	205.376		2024-03-27 05:05:19	150.404		2024-05-22	03:18:56	2024-05-22 03:18:56	216.551		2024-05-22	02:27:19	2024-05-22 02:27:19	0.815
2024-03-27 05:20:15	206.76		2024-03-27 05:05:49	152.067		2024-05-22	03:19:26	2024-05-22 03:19:26	218.292		2024-05-22	02:27:49	2024-05-22 02:27:49	0.825
2024-03-27 05:20:45	205.446		2024-03-27 05:06:19	149.12		2024-05-22	03:19:56	2024-05-22 03:19:56	219.795		2024-05-22	02:28:19	2024-05-22 02:28:19	0.832
2024-03-27 05:21:15	205.627		2024-03-27 05:06:49	142.873		2024-05-22	03:20:26	2024-05-22 03:20:26	220.069		2024-05-22	02:28:49	2024-05-22 02:28:49	0.8
2024-03-27 05:21:45	205.145		2024-03-27 05:07:19	142.17		2024-05-22	03:20:56	2024-05-22 03:20:56	219.805		2024-05-22	02:29:19	2024-05-22 02:29:19	0.82
2024-03-27 05:22:15	204.987		2024-03-27 05:07:49	140.672		2024-05-22	03:21:26	2024-05-22 03:21:26	218.983		2024-05-22	02:29:49	2024-05-22 02:29:49	0.822
2024-03-27 05:22:45	205.239		2024-03-27 05:08:19	137.752		2024-05-22	03:21:56	2024-05-22 03:21:56	217.655		2024-05-22	02:30:19	2024-05-22 02:30:19	0.82
2024-03-27 05:23:15	205.342		2024-03-27 05:08:49	143.382		2024-05-22	03:22:26	2024-05-22 03:22:26	216.66		2024-05-22	02:30:49	2024-05-22 02:30:49	0.81
2024-03-27 05:23:45	204.764		2024-03-27 05:09:19	147.558		2024-05-22	03:22:56	2024-05-22 03:22:56	215.926		2024-05-22	02:31:19	2024-05-22 02:31:19	0.82
2024-03-27 05:24:15	205.264		2024-03-27 05:09:49	150.238		2024-05-22	03:23:26	2024-05-22 03:23:26	217.551		2024-05-22	02:31:49	2024-05-22 02:31:49	0.805
2024-03-27 05:24:45	204.234		2024-03-27 05:10:19	135.482		2024-05-22	03:23:56	2024-05-22 03:23:56	218.813		2024-05-22	02:32:19	2024-05-22 02:32:19	0.835
2024-03-27 05:25:15	204.778		2024-03-27 05:10:49	144.518		2024-05-22	03:24:26	2024-05-22 03:24:26	218.401		2024-05-22	02:32:49	2024-05-22 02:32:49	0.847
2024-03-27 05:25:45	205.911		2024-03-27 05:11:19	144.124		2024-05-22	03:24:56	2024-05-22 03:24:56	218.521		2024-05-22	02:33:19	2024-05-22 02:33:19	0.835
2024-03-27 05:26:15	205.779		2024-03-27 05:11:49	143.745		2024-05-22	03:25:26	2024-05-22 03:25:26	218.914		2024-05-22	02:33:49	2024-05-22 02:33:49	0.835
2024-03-27 05:26:45	205.929		2024-03-27 05:12:19	147.381		2024-05-22	03:25:56	2024-05-22 03:25:56	220.983		2024-05-22	02:34:19	2024-05-22 02:34:19	0.815
2024-03-27 05:27:15	205.299		2024-03-27 05:12:49	147.869		2024-05-22	03:26:26	2024-05-22 03:26:26	223.976		2024-05-22	02:34:49	2024-05-22 02:34:49	0.837
2024-03-27 05:27:45	206.228		2024-03-27 05:13:19	153.934		2024-05-22	03:26:56	2024-05-22 03:26:56	224.602		2024-05-22	02:35:19	2024-05-22 02:35:19	0.803
2024-03-27 05:28:15	205.672		2024-03-27 05:13:49	154.276		2024-05-22	03:27:26	2024-05-22 03:27:26	224.618		2024-05-22	02:35:49	2024-05-22 02:35:49	0.822
2024-03-27 05:28:45	204.883		2024-03-27 05:14:19	156.466		2024-05-22	03:27:56	2024-05-22 03:27:56	224.947		2024-05-22	02:36:19	2024-05-22 02:36:19	0.82
2024-03-27 05:29:15	203.818		2024-03-27 05:14:49	159.679		2024-05-22	03:28:26	2024-05-22 03:28:26	225.599		2024-05-22	02:36:49	2024-05-22 02:36:49	0.817
2024-03-27 05:29:45	204.338		2024-03-27 05:15:19	161.541		2024-05-22	03:28:56	2024-05-22 03:28:56	225.594		2024-05-22	02:37:19	2024-05-22 02:37:19	0.812
2024-03-27 05:30:15	204.932		2024-03-27 05:15:49	160.597		2024-05-22	03:29:26	2024-05-22 03:29:26	225.348		2024-05-22	02:37:49	2024-05-22 02:37:49	0.805
2024-03-27 05:30:45	204.204		2024-03-27 05:16:19	159.868		2024-05-22	03:29:56	2024-05-22 03:29:56	225.564		2024-05-22	02:38:19	2024-05-22 02:38:19	0.82
2024-03-27 05:31:15	204.633		2024-03-27 05:16:49	157.348		2024-05-22	03:30:26	2024-05-22 03:30:26	225.255		2024-05-22	02:38:49	2024-05-22 02:38:49	0.815
2024-03-27 05:31:45	203.574		2024-03-27 05:17:19	157.17		2024-05-22	03:30:56	2024-05-22 03:30:56	225.31		2024-05-22	02:39:19	2024-05-22 02:39:19	0.818
2024-03-27 05:32:15	203.805		2024-03-27 05:17:49	157.626		2024-05-22	03:31:26	2024-05-22 03:31:26	224.985		2024-05-22	02:39:49	2024-05-22 02:39:49	0.825
2024-03-27 05:32:45	204.469		2024-03-27 05:18:19	158.505		2024-05-22	03:31:56	2024-05-22 03:31:56	224.311		2024-05-22	02:40:19	2024-05-22 02:40:19	0.827
2024-03-27 05:33:15	203.524		2024-03-27 05:18:49	151.983		2024-05-22	03:32:26	2024-05-22 03:32:26	222.802		2024-05-22	02:40:49	2024-05-22 02:40:49	0.803
2024-03-27 05:33:45	204.155		2024-03-27 05:19:19	149.654		2024-05-22	03:32:56	2024-05-22 03:32:56	224.265		2024-05-22	02:41:19	2024-05-22 02:41:19	0.835
2024-03-27 05:34:15	204.463		2024-03-27 05:19:49	148.102		2024-05-22	03:33:26	2024-05-22 03:33:26	224.656		2024-05-22	02:41:49	2024-05-22 02:41:49	0.82
2024-03-27 05:34:45	204.408		2024-03-27 05:20:19	144.459		2024-05-22	03:33:56	2024-05-22 03:33:56	224.596		2024-05-22	02:42:19	2024-05-22 02:42:19	0.825
2024-03-27 05:35:15	204.683		2024-03-27 05:20:49	150.129		2024-05-22	03:34:26	2024-05-22 03:34:26	224.507		2024-05-22	02:42:49	2024-05-22 02:42:49	0.82
2024-03-27 05:35:45	203.651		2024-03-27 05:21:19	154.41		2024-05-22	03:34:56	2024-05-22 03:34:56	224.564		2024-05-22	02:43:19	2024-05-22 02:43:19	0.825
2024-03-27 05:36:15	204.608		2024-03-27 05:21:49	158.558		2024-05-22	03:35:26	2024-05-22 03:35:26	225.003		2024-05-22	02:43:49	2024-05-22 02:43:49	0.825
2024-03-27 05:36:45	203.608		2024-03-27 05:22:19	161.712		2024-05-22	03:35:56	2024-05-22 03:35:56	224.492		2024-05-22	02:44:19	2024-05-22 02:44:19	0.83
2024-03-27 05:37:15	204.018		2024-03-27 05:22:49	162.229		2024-05-22	03:36:26	2024-05-22 03:36:26	224.556		2024-05-22	02:44:49	2024-05-22 02:44:49	0.82
2024-03-27 05:37:45	203.264		2024-03-27 05:23:19	162.131		2024-05-22	03:36:56	2024-05-22 03:36:56	224.251		2024-05-22	02:45:19	2024-05-22 02:45:19	0.82
2024-03-27 05:38:15	204.362		2024-03-27 05:23:49	164.912		2024-05-22	03:37:26	2024-05-22 03:37:26	224.232		2024-05-22	02:45:49	2024-05-22 02:45:49	0.81
2024-03-27 05:38:45	204.094		2024-03-27 05:24:19	166.057		2024-05-22	03:37:56	2024-05-22 03:37:56	223.996		2024-05-22	02:46:19	2024-05-22 02:46:19	0.827
2024-03-27 05:39:15	203.741		2024-03-27 05:24:49	160.305		2024-05-22	03:38:26	2024-05-22 03:38:26	223.054		2024-05-22	02:46:49	2024-05-22 02:46:49	0.832
2024-03-27 05:39:45	204.399		2024-03-27 05:25:19	156.747		2024-05-22	03:38:56	2024-05-22 03:38:56	222.094		2024-05-22	02:47:19	2024-05-22 02:47:19	0.832
2024-03-27 05:40:15	204.69		2024-03-27 05:25:49	152.135		2024-05-22	03:39:26	2024-05-22 03:39:26	222.171		2024-05-22	02:47:49	2024-05-22 02:47:49	0.901
2024-03-27 05:40:45	204.353		2024-03-27 05:26:19	154.195		2024-05-22	03:39:56	2024-05-22 03:39:56	221.519		2024-05-22	02:48:19	2024-05-22 02:48:19	1.394
2024-03-27 05:41:15	204.442		2024-03-27 05:26:49	157.414		2024-05-22	03:40:26	2024-05-22 03:40:26	222.647		2024-05-22	02:48:49	2024-05-22 02:48:49	1.621
2024-03-27 05:41:45	204.819		2024-03-27 05:27:19	161.694		2024-05-22	03:40:56	2024-05-22 03:40:56	224.565		2024-05-22	02:49:19	2024-05-22 02:49:19	1.952
2024-03-27 05:42:15	204.504		2024-03-27 05:27:49	164.121		2024-05-22	03:41:26	2024-05-22 03:41:26	224.57		2024-05-22	02:49:49	2024-05-22 02:49:49	2.322
2024-03-27 05:42:45	203.297		2024-03-27 05:28:19	152.442		2024-05-22	03:41:56	2024-05-22 03:41:56	224.895		2024-05-22	02:50:19	2024-05-22 02:50:19	2.591
2024-03-27 05:43:15	204.227		2024-03-27 05:28:49	148.154		2024-05-22	03:42:26	2024-05-22 03:42:26	224.681		2024-05-22	02:50:49	2024-05-22 02:50:49	3.255
2024-03-27 05:43:45	204.054		2024-03-27 05:29:19	146.374		2024-05-22	03:42:56	2024-05-22 03:42:56	224.414		2024-05-22	02:51:19	2024-05-22 02:51:19	3.196
2024-03-27 05:44:15	203.512		2024-03-27 05:29:49	144.777		2024-05-22	03:43:26	2024-05-22 03:43:26	224.211		2024-05-22	02:51:49	2024-05-22 02:51:49	2.734
2024-03-27 05:44:45	204.377		2024-03-27 05:30:19	156.222		2024-05-22	03:43:56	2024-05-22 03:43:56	223.885		2024-05-22	02:52:19	2024-05-22 02:52:19	3.234
2024-03-27 05:45:15	203.543		2024-03-27 05:30:49	159.463		2024-05-22	03:44:26	2024-05-22 03:44:26	223.069		2024-05-22	02:52:49	2024-05-22 02:52:49	3.091
2024-03-27 05:45:45	203.852		2024-03-27 05:31:19	153.734		2024-05-22	03:44:56	2024-05-22 03:44:56	222.653		2024-05-22	02:53:19	2024-05-22 02:53:19	3.07
2024-03-27 05:46:15	203.724		2024-03-27 05:31:49	153.488		2024-05-22	03:45:26	2024-05-22 03:45:26	223.101		2024-05-22	02:53:49	2024-05-22 02:53:49	3.152
2024-03-27 05:46:45	202.746		2024-03-27 05:32:19	154.744		2024-05-22	03:45:56	2024-05-22 03:45:56	223.113		2024-05-22	02:54:19	2024-05-22 02:54:19	3.058
2024-03-27 05:47:15	204.918		2024-03-27 05:32:49	160.801		2024-05-22	03:46:26	2024-05-22 03:46:26	222.769		2024-05-22	02:54:49	2024-05-22 02:54:49	2.943
2024-03-27 05:47:45	202.563		2024-03-27 05:33:19	163.216		2024-05-22	03:46:56	2024-05-22 03:46:56	222.615		2024-05-22	02:55:19	2024-05-22 02:55:19	2.721
2024-03-27 05:48:15	202.728		2024-03-27 05:33:49	162.023		2024-05-22	03:47:26	2024-05-22 03:47:26	222.37		2024-05-22	02:55:49	2024-05-22 02:55:49	2.665
2024-03-27 05:48:45	202.59		2024-03-27 05:34:19	163.59		2024-05-22	03:47:56	2024-05-22 03:47:56	222.014		2024-05-22	02:56:19	2024-05-22 02:56:19	2.493
2024-03-27 05:49:15	201.799		2024-03-27 05:34:49	158.199		2024-05-22	03:48:26	2024-05-22 03:48:26	221.767		2024-05-22	02:56:49	2024-05-22 02:56:49	2.308
2024-03-27 05:49:45	203.042		2024-03-27 05:35:19	160.907		2024-05-22	03:48:56	2024-05-22 03:48:56	220.906		2024-05-22	02:57:19	2024-05-22 02:57:19	2.01
2024-03-27 05:50:15	204.132		2024-03-27 05:35:49	158.261		2024-05-22	03:49:26	2024-05-22 03:49:26	220.081		2024-05-22	02:57:49	2024-05-22 02:57:49	1.774
2024-03-27 05:50:45	203.392		2024-03-27 05:36:19	160.862		2024-05-22	03:49:56	2024-05-22 03:49:56	219.951		2024-05-22	02:58:19	2024-05-22 02:58:19	1.559
2024-03-27 05:51:15	205.753		2024-03-27 05:36:49	158.676		2024-05-22	03:50:26	2024-05-22 03:50:26	219.29		2024-05-22	02:58:49	2024-05-22 02:58:49	1.32
2024-03-27 05:51:45	204.037		2024-03-27 05:37:19	156.618		2024-05-22	03:50:56	2024-05-22 03:50:56	217.862		2024-05-22	02:59:19	2024-05-22 02:59:19	1.152
2024-03-27 05:52:15	203.69		2024-03-27 05:37:49	158.334		2024-05-22	03:51:26	2024-05-22 03:51:26	217.688		2024-05-22	02:59:49	2024-05-22 02:59:49	1.033
2024-03-27 05:52:45	202.432		2024-03-27 05:38:19	159.107		2024-05-22	03:51:56	2024-05-22 03:51:56	219.975		2024-05-22	03:00:19	2024-05-22 03:00:19	0.934
2024-03-27 05:53:15	203.518		2024-03-27 05:38:49	172.09		2024-05-22	03:52:26	2024-05-22 03:52:26	221.98		2024-05-22	03:00:49	2024-05-22 03:00:49	0.889
2024-03-27 05:53:45	204.633		2024-03-27 05:39:19	173.292		2024-05-22	03:52:56	2024-05-22 03:52:56	221.731		2024-05-22	03:01:19	2024-05-22 03:01:19	0.857
2024-03-27 05:54:15	205.009		2024-03-27 05:39:49	169.412		2024-05-22	03:53:26	2024-05-22 03:53:26	220.857		2024-05-22	03:01:49	2024-05-22 03:01:49	0.818
2024-03-27 05:54:45	204.586		2024-03-27 05:40:19	165.9		2024-05-22	03:53:56	2024-05-22 03:53:56	221.132		2024-05-22	03:02:19	2024-05-22 03:02:19	0.83
2024-03-27 05:55:15	205.151		2024-03-27 05:40:49	165.416		2024-05-22	03:54:26	2024-05-22 03:54:26	221.586		2024-05-22	03:02:49	2024-05-22 03:02:49	0.84
2024-03-27 05:55:45	204.813		2024-03-27 05:41:19	176.015		2024-05-22	03:54:56	2024-05-22 03:54:56	222.169		2024-05-22	03:03:19	2024-05-22 03:03:19	0.811
2024-03-27 05:56:15	205.638		2024-03-27 05:41:49	181.616		2024-05-22	03:55:26	2024-05-22 03:55:26	221.399		2024-05-22	03:03:49	2024-05-22 03:03:49	0.816
2024-03-27 05:56:45	205.432		2024-03-27 05:42:19	182.458		2024-05-22	03:55:56	2024-05-22 03:55:56	221.211		2024-05-22	03:04:19	2024-05-22 03:04:19	0.816
2024-03-27 05:57:15	205.202		2024-03-27 05:42:49	175.619		2024-05-22	03:56:26	2024-05-22 03:56:26	219.465		2024-05-22	03:04:49	2024-05-22 03:04:49	0.798
2024-03-27 05:57:45	204.612		2024-03-27 05:43:19	164.107		2024-05-22	03:56:56	2024-05-22 03:56:56	218.857		2024-05-22	03:05:19	2024-05-22 03:05:19	0.813
2024-03-27 05:58:15	204.548		2024-03-27 05:43:49	160.076		2024-05-22	03:57:26	2024-05-22 03:57:26	219.614		2024-05-22	03:05:49	2024-05-22 03:05:49	0.778
2024-03-27 05:58:45	205.494		2024-03-27 05:44:19	162.508		2024-05-22	03:57:56	2024-05-22 03:57:56	221.656		2024-05-22	03:06:19	2024-05-22 03:06:19	0.825
2024-03-27 05:59:15	205.586		2024-03-27 05:44:49	148.606		2024-05-22	03:58:26	2024-05-22 03:58:26	222.579		2024-05-22	03:06:49	2024-05-22 03:06:49	0.803
2024-03-27 05:59:45	204.129		2024-03-27 05:45:19	132.238		2024-05-22	03:58:56	2024-05-22 03:58:56	223.455		2024-05-22	03:07:19	2024-05-22 03:07:19	0.801
2024-03-27 06:00:15	205.946		2024-03-27 05:45:49	139.344		2024-05-22	03:59:26	2024-05-22 03:59:26	223.172		2024-05-22	03:07:49	2024-05-22 03:07:49	0.806
2024-03-27 06:00:45	203.504		2024-03-27 05:46:19	152.309		2024-05-22	03:59:56	2024-05-22 03:59:56	221.878		2024-05-22	03:08:19	2024-05-22 03:08:19	0.801
2024-03-27 06:01:15	204.886		2024-03-27 05:46:49	161.274		2024-05-22	04:00:26	2024-05-22 04:00:26	221.547		2024-05-22	03:08:49	2024-05-22 03:08:49	0.808
2024-03-27 06:01:45	205.532		2024-03-27 05:47:19	166.2		2024-05-22	04:00:56	2024-05-22 04:00:56	221.706		2024-05-22	03:09:19	2024-05-22 03:09:19	0.816
2024-03-27 06:02:15	206.175		2024-03-27 05:47:49	165.025		2024-05-22	04:01:26	2024-05-22 04:01:26	221.235		2024-05-22	03:09:49	2024-05-22 03:09:49	0.811
2024-03-27 06:02:45	205.765		2024-03-27 05:48:19	169.604		2024-05-22	04:01:56	2024-05-22 04:01:56	220.33		2024-05-22	03:10:19	2024-05-22 03:10:19	0.833
2024-03-27 06:03:15	205.392		2024-03-27 05:48:49	170.293		2024-05-22	04:02:26	2024-05-22 04:02:26	220.07		2024-05-22	03:10:49	2024-05-22 03:10:49	0.816
2024-03-27 06:03:45	205.134		2024-03-27 05:49:19	169.397		2024-05-22	04:02:56	2024-05-22 04:02:56	219.142		2024-05-22	03:11:19	2024-05-22 03:11:19	0.816
2024-03-27 06:04:15	205.524		2024-03-27 05:49:49	169.584		2024-05-22	04:03:26	2024-05-22 04:03:26	219.045		2024-05-22	03:11:49	2024-05-22 03:11:49	0.818
2024-03-27 06:04:45	205.777		2024-03-27 05:50:19	170.485		2024-05-22	04:03:56	2024-05-22 04:03:56	217.678		2024-05-22	03:12:19	2024-05-22 03:12:19	0.828
2024-03-27 06:05:15	205.008		2024-03-27 05:50:49	170.369		2024-05-22	04:04:26	2024-05-22 04:04:26	216.77		2024-05-22	03:12:49	2024-05-22 03:12:49	0.808
2024-03-27 06:05:45	205.545		2024-03-27 05:51:19	164.033		2024-05-22	04:04:56	2024-05-22 04:04:56	216.993		2024-05-22	03:13:19	2024-05-22 03:13:19	0.798
2024-03-27 06:06:15	205.057		2024-03-27 05:51:49	155.725		2024-05-22	04:05:26	2024-05-22 04:05:26	217.255		2024-05-22	03:13:49	2024-05-22 03:13:49	0.842
2024-03-27 06:06:45	204.18		2024-03-27 05:52:19	155.98		2024-05-22	04:05:56	2024-05-22 04:05:56	218.523		2024-05-22	03:14:19	2024-05-22 03:14:19	0.808
2024-03-27 06:07:15	204.243		2024-03-27 05:52:49	157.621		2024-05-22	04:06:26	2024-05-22 04:06:26	220.585		2024-05-22	03:14:49	2024-05-22 03:14:49	0.805
2024-03-27 06:07:45	205.262		2024-03-27 05:53:19	159.228		2024-05-22	04:06:56	2024-05-22 04:06:56	220.381		2024-05-22	03:15:19	2024-05-22 03:15:19	0.805
2024-03-27 06:08:15	205.228		2024-03-27 05:53:49	160.9		2024-05-22	04:07:26	2024-05-22 04:07:26	220.898		2024-05-22	03:15:49	2024-05-22 03:15:49	0.788
2024-03-27 06:08:45	204.844		2024-03-27 05:54:19	160.61		2024-05-22	04:07:56	2024-05-22 04:07:56	221.493		2024-05-22	03:16:19	2024-05-22 03:16:19	0.798
2024-03-27 06:09:15	204.971		2024-03-27 05:54:49	157.888		2024-05-22	04:08:26	2024-05-22 04:08:26	222.075		2024-05-22	03:16:49	2024-05-22 03:16:49	0.793
2024-03-27 06:09:45	205.207		2024-03-27 05:55:19	166.062		2024-05-22	04:08:56	2024-05-22 04:08:56	222.15		2024-05-22	03:17:19	2024-05-22 03:17:19	0.805
2024-03-27 06:10:15	205.005		2024-03-27 05:55:49	169.952		2024-05-22	04:09:26	2024-05-22 04:09:26	221.544		2024-05-22	03:17:49	2024-05-22 03:17:49	0.82
2024-03-27 06:10:45	204.263		2024-03-27 05:56:19	165.012		2024-05-22	04:09:56	2024-05-22 04:09:56	221.614		2024-05-22	03:18:19	2024-05-22 03:18:19	0.805
2024-03-27 06:11:15	204.099		2024-03-27 05:56:49	166.378		2024-05-22	04:10:26	2024-05-22 04:10:26	222.56		2024-05-22	03:18:49	2024-05-22 03:18:49	0.807
2024-03-27 06:11:45	205.245		2024-03-27 05:57:19	166.518		2024-05-22	04:10:56	2024-05-22 04:10:56	223.368		2024-05-22	03:19:19	2024-05-22 03:19:19	0.803
2024-03-27 06:12:15	205.102		2024-03-27 05:57:49	163.958		2024-05-22	04:11:26	2024-05-22 04:11:26	222.886		2024-05-22	03:19:49	2024-05-22 03:19:49	0.813
2024-03-27 06:12:45	205.788		2024-03-27 05:58:19	160.434		2024-05-22	04:11:56	2024-05-22 04:11:56	221.926		2024-05-22	03:20:19	2024-05-22 03:20:19	0.8
2024-03-27 06:13:15	205.743		2024-03-27 05:58:49	159.302		2024-05-22	04:12:26	2024-05-22 04:12:26	221.265		2024-05-22	03:20:49	2024-05-22 03:20:49	0.813
2024-03-27 06:13:45	205.531		2024-03-27 05:59:19	161.264		2024-05-22	04:12:56	2024-05-22 04:12:56	220.384		2024-05-22	03:21:19	2024-05-22 03:21:19	0.823
2024-03-27 06:14:15	205.564		2024-03-27 05:59:49	164.947		2024-05-22	04:13:26	2024-05-22 04:13:26	219.239		2024-05-22	03:21:49	2024-05-22 03:21:49	0.803
2024-03-27 06:14:45	205.708		2024-03-27 06:00:19	169.23		2024-05-22	04:13:56	2024-05-22 04:13:56	218.25		2024-05-22	03:22:19	2024-05-22 03:22:19	0.808
2024-03-27 06:15:15	205.777		2024-03-27 06:00:49	170.21		2024-05-22	04:14:26	2024-05-22 04:14:26	218.114		2024-05-22	03:22:49	2024-05-22 03:22:49	0.81
2024-03-27 06:15:45	206.223		2024-03-27 06:01:19	164.264		2024-05-22	04:14:56	2024-05-22 04:14:56	212.154		2024-05-22	03:23:19	2024-05-22 03:23:19	0.806
2024-03-27 06:16:15	206.028		2024-03-27 06:01:49	159.991		2024-05-22	04:15:26	2024-05-22 04:15:26	210.289		2024-05-22	03:23:49	2024-05-22 03:23:49	0.803
2024-03-27 06:16:45	206.112		2024-03-27 06:02:19	156.218		2024-05-22	04:15:56	2024-05-22 04:15:56	210.302		2024-05-22	03:24:19	2024-05-22 03:24:19	0.803
2024-03-27 06:17:15	206.629		2024-03-27 06:02:49	153.84		2024-05-22	04:16:26	2024-05-22 04:16:26	209.54		2024-05-22	03:24:49	2024-05-22 03:24:49	0.813
2024-03-27 06:17:45	206.597		2024-03-27 06:03:19	151.753		2024-05-22	04:16:56	2024-05-22 04:16:56	209.031		2024-05-22	03:25:19	2024-05-22 03:25:19	0.82
2024-03-27 06:18:15	206.458		2024-03-27 06:03:49	153.514		2024-05-22	04:17:26	2024-05-22 04:17:26	207.951		2024-05-22	03:25:49	2024-05-22 03:25:49	0.818
2024-03-27 06:18:45	206.637		2024-03-27 06:04:19	158.416		2024-05-22	04:17:56	2024-05-22 04:17:56	207.257		2024-05-22	03:26:19	2024-05-22 03:26:19	0.82
2024-03-27 06:19:15	206.633		2024-03-27 06:04:49	158.166		2024-05-22	04:18:26	2024-05-22 04:18:26	207.352		2024-05-22	03:26:49	2024-05-22 03:26:49	0.813
2024-03-27 06:19:45	207.266		2024-03-27 06:05:19	159.583		2024-05-22	04:18:56	2024-05-22 04:18:56	205.252		2024-05-22	03:27:19	2024-05-22 03:27:19	0.833
2024-03-27 06:20:15	207.413		2024-03-27 06:05:49	161.65		2024-05-22	04:19:26	2024-05-22 04:19:26	204.121		2024-05-22	03:27:49	2024-05-22 03:27:49	0.826
2024-03-27 06:20:45	207.429		2024-03-27 06:06:19	167.208		2024-05-22	04:19:56	2024-05-22 04:19:56	203.327		2024-05-22	03:28:19	2024-05-22 03:28:19	0.801
2024-03-27 06:21:15	207.449		2024-03-27 06:06:49	168.104		2024-05-22	04:20:26	2024-05-22 04:20:26	203.598		2024-05-22	03:28:49	2024-05-22 03:28:49	0.806
2024-03-27 06:21:45	207.729		2024-03-27 06:07:19	166.069		2024-05-22	04:20:56	2024-05-22 04:20:56	204.887		2024-05-22	03:29:19	2024-05-22 03:29:19	0.811
2024-03-27 06:22:15	207.49		2024-03-27 06:07:49	173.282		2024-05-22	04:21:26	2024-05-22 04:21:26	203.652		2024-05-22	03:29:49	2024-05-22 03:29:49	0.809
2024-03-27 06:22:45	207.415		2024-03-27 06:08:19	176.322		2024-05-22	04:21:56	2024-05-22 04:21:56	204.395		2024-05-22	03:30:19	2024-05-22 03:30:19	0.836
2024-03-27 06:23:15	207.686		2024-03-27 06:08:49	178.584		2024-05-22	04:22:26	2024-05-22 04:22:26	204.559		2024-05-22	03:30:49	2024-05-22 03:30:49	0.816
2024-03-27 06:23:45	207.708		2024-03-27 06:09:19	177.634		2024-05-22	04:22:56	2024-05-22 04:22:56	210.859		2024-05-22	03:31:19	2024-05-22 03:31:19	0.811
2024-03-27 06:24:15	207.582		2024-03-27 06:09:49	176.428		2024-05-22	04:23:26	2024-05-22 04:23:26	216.86		2024-05-22	03:31:49	2024-05-22 03:31:49	0.808
2024-03-27 06:24:45	207.562		2024-03-27 06:10:19	167.16		2024-05-22	04:23:56	2024-05-22 04:23:56	218.556		2024-05-22	03:32:19	2024-05-22 03:32:19	0.816
2024-03-27 06:25:15	207.501		2024-03-27 06:10:49	167.159		2024-05-22	04:24:26	2024-05-22 04:24:26	218.524		2024-05-22	03:32:49	2024-05-22 03:32:49	0.823
[truncated: 3,677 more rows]

## Sheet: Decomposition
Decomposition experiment
Seagrass leaves													Legend:
Sample ID	Date	Hour	TA [mEq/Kg]	std	PO43- [uM]	std	SO42- [mM]	std	H2S [mM]	std	NH4+		Sample id	Organic matter
L1+2	2022-04-21	10:20:00	3.1922	0.0279519	0	0.937977	31.7639	0.0249312	0.0169627		0.436498		L	Segrass leaves
L3+4	2022-04-23	19:20:00	6.50641	0.246473	5.8225	0.0784889	30.2919	0.137121	0.59401	0.0320191	41.4294		A	Alage
L5+6	2022-04-26	18:30:00	11.9174	0.150239	10.1905	1.73029	28.2646	0.785332	1.87715	0.269774	16.0031		R	seagrass Roots + Rhizomes
L7+8	2022-04-29	19:20:00	14.9432	0.460217	14.2655	3.00591	26.7573		2.06231	0.00540475	0		C	Control
L9+10	2022-05-02	18:00:00	18.8235	0.766154	28.806	3.48604	26.5986	0.498623	2.40435	0.355922	0
L11+12	2022-05-04	16:30:00	18.3996	1.54393	27.774	3.73777	25.3382	0.511089	2.48652	0.0185618	0
L13+14	2022-05-10	13:00:00	17.4076	0.38637	31.4455	2.58023	25.1795	0.0373968	2.09132	0.522923	0
L15+16	2022-05-12	09:00:00	17.0947	0.138536	29.034	0.519016	26.0257	0.361502	1.9963	0.0850566	0
L17+18	2022-05-15	09:00:00	18.5903	0.118168	34.3215	0.972272	24.9239	1.79504	2.18918	0.114346	0
Algae
Sample ID	Date	Hour	TA [mEq/Kg]	std	PO43- [uM]	std	SO42- [mM]	std	H2S [mM]	std	NH4+
A1+2	2022-04-21	10:20:00	2.83211	0.108237	0.0956275	0.209788	31.57	0.64821	0		2.66876
A3+4	2022-04-23	19:20:00	8.77588	0.347942	0.283174	0.475184	31.4554	0.411364	0.139115		0.637553
A5+6	2022-04-26	18:30:00	12.3014	0.199376	0.26812	0.261574	30.8825	0.0747935	1.20755	0.144181	4.49738
A7+8	2022-04-29	19:20:00	15.7584	0.909576	0.722195	0.403765	29.3223	0.186984	2.27148	0.195363	3.39668
A9+10	2022-05-02	18:00:00	19.7051	0.174143	1.33788	0.923361	26.3254	0.386433	2.52821	0.230057	1.99723
A11+12	2022-05-04	16:30:00	20.9613	2.60919	2.41065	0.220688	26.0081	0.411364	2.09485	0.242286	9.35358
A13+14	2022-05-10	13:00:00	16.575	1.81099	9.81095	0.0990657	27.6211	0.0747935	1.97644	0.329062	6.32284
A15+16	2022-05-12	09:00:00	20.6932	1.25165	17.4625	1.98909	26.678	0.211915	2.96976	0.229565	15.5099
A17+18	2022-05-15	09:00:00	19.4583	2.92121	15.1141	10.0026	26.3166	0.224381	2.07709	0.544133	19.6121
Roots & Rhizomes
Sample ID	Date	Hour	TA [mEq/Kg]	std	PO43- [uM]	std	SO42- [mM]	std	H2S [mM]	std	NH4+
R1+2	2022-04-21	10:20:00	2.945	0.0961807	-0.34396	0.0478711	31.7639	0.249312	0		5.89771
R3+4	2022-04-23	19:20:00	8.18098	0.355965	3.2975	0.0555786	30.5652	0.498623	0.71038	0.099906	23.9381
R5+6	2022-04-26	18:30:00	10.823	0.233985	5.0417	0.495823	29.5339	0.162053	1.58189	0.0113008	2.33066
R7+8	2022-04-29	19:20:00	15.6596	0.995861	6.18625	1.37172	27.4096	0.174518	2.59675	0.552841	1.37966
R9+10	2022-05-02	18:00:00	17.347	0.853793	9.21345	1.2665	26.8102	0.548486	2.77178	0.701444	1.77627
R11+12	2022-05-04	16:30:00	18.1376	0.641752	10.711	0.222032	25.9464	0.0498623	2.46189	0.440132	1.96647
R13+14	2022-05-10	13:00:00	20.6128	0.765698	15.7395	1.76847	25.25	0.0872591	2.64198	0.129714	2.40704
R15+16	2022-05-12	09:00:00	17.3834	0.223117	14.4135	0.505581	25.7877	0.373968	2.35768	0.291174	2.49422
R17+18	2022-05-15	09:00:00	20.9712	0.320206	28.95	0.244659	23.7516	0.560951	2.638	0.0649116	0.745905
Control
Sample ID	Date	Hour	TA [mEq/Kg]	std	PO43- [uM]	std	SO42- [mM]	std	H2S [mM]	std	NH4+
C1+2	2022-04-21	10:20:00	2.52647	0.0273438	0	0	30.7943	0.249312	0	0	0.360138
C3+4	2022-04-23	19:20:00	2.45999	0.0260074	0	0	30.9177	0.199449	0	0	0.351444
C5+6	2022-04-26	18:30:00	2.6126	0.0540725	0	0	30.3977	0.885057	0	0	1.20608
C7+8	2022-04-29	19:20:00	2.8126	0.142326	0	0	31.0235	0.149587	0	0	1.52776
C9+10	2022-05-02	18:00:00	4.50907	0.194327	0	0	31.5524	0.0249312	0	0	2.31732
C11+12	2022-05-04	16:30:00	5.12954	0.0539487	0	0	31.4025	0.361502	0	0	1.02509
C13+14	2022-05-10	13:00:00	5.03782	0.308504	0	0	31.3761	0.822729	0	0	3.09819
C15+16	2022-05-12	09:00:00	5.21587	0.151126	0	0	30.4858	0.909988	0	0	0.614632
C17+18	2022-05-15	09:00:00	6.21963	0.0125158	0	0	31.4554	0.0373968	0	0	1.33438

## Sheet: Water samples
Water chemistry measurements
Date	Site	water type	Sample id	DIC [mM]	TA [uEq Kg-1]	Total sulfide [mM]
2024-03-27	below mat	water column	1	2.189	2.533	0
2024-03-27	below mat	water column	2	2.284	2.545	0.045
2024-03-27	below mat	water column	3	2.209	2.556	0.009
2024-03-27	below mat	water column	4	2.22	2.561	0.022
2024-03-27	below mat	water column	5	2.304	2.542	0.08
2024-03-27	below mat	water column	6	2.19	2.521	0.007
2024-03-27	below mat	water column	7	2.279	2.564	0.066
2024-03-27	below mat	water column	8	2.22	2.554	0.025
2024-03-27	below mat	water column	9	2.196	2.531	0.006
2024-03-27	below mat	water column	10	2.182	2.52339	0.013
2024-03-27	below mat	pore water	1	3.308	3.52344	0.012
2024-03-27	below mat	pore water	2	2.523	2.64334	0.01
2024-03-27	below mat	pore water	3	2.542	2.75156	0.005
2024-03-27	below mat	pore water	4	2.79426	2.90793	0.04
2024-03-27	below mat	pore water	5	2.48326	2.73557	0.02
2024-03-27	below mat	pore water	6	2.5	2.73635	0.012
2024-03-27	below mat	pore water	7	2.383	2.56384	0.013
2024-03-27	below mat	pore water	8	3.877	4.05281	0.014
2024-03-27	below mat	pore water	9	3.642	3.93647	0.015
2024-03-27	below mat	pore water	10	3.541	4.112	0.029
2024-03-27	no mat	water column	11	2.188	2.54022	0.016
2024-03-27	no mat	water column	12	2.147	2.58294	0.005
2024-03-27	no mat	water column	13	2.153	2.465	0.004
2024-03-27	no mat	water column	14	2.147	2.512	0.002
2024-03-27	no mat	water column	15	2.146	2.548	0.002
2024-03-27	no mat	water column	16	2.149	2.512	0
2024-03-27	no mat	water column	17	2.149	2.561	0.007
2024-03-27	no mat	water column	18	2.142	2.514	0.003
2024-03-27	no mat	water column	19	2.15	2.581	0.002
2024-03-27	no mat	water column	20	2.153	2.522	0.002
2024-03-27	no mat	pore water	11	2.374	2.46724	0.013
2024-03-27	no mat	pore water	12	2.323	2.53799	0.015
2024-03-27	no mat	pore water	13	2.498	2.64543	0.025
2024-03-27	no mat	pore water	14	2.359	2.54238	0.026
2024-03-27	no mat	pore water	15	2.386	2.55963	0.005
2024-03-27	no mat	pore water	16	2.442	2.59765	0.008
2024-03-27	no mat	pore water	17	2.459	2.601	0.006
2024-03-27	no mat	pore water	18	2.395	2.584	0.014
2024-03-27	no mat	pore water	19	2.512	2.647	0.025
2024-03-27	no mat	pore water	20	2.487	2.655	0.036
2024-05-27	no mat	water column	21	2.173	2.492	1.2e-05
2024-05-27	no mat	water column	22	2.164	2.509	4e-06
2024-05-27	no mat	water column	23	2.16	2.484	3e-06
2024-05-27	no mat	water column	24	2.162	2.487	5e-06
2024-05-27	no mat	water column	25	2.164	2.491	0
2024-05-27	no mat	water column	26	2.167	2.496	0
2024-05-27	no mat	water column	27	2.17	2.505	5e-06
2024-05-27	no mat	water column	28	2.172	2.509	3e-06
2024-05-27	no mat	water column	29	2.175	2.513	1e-06
2024-05-27	no mat	pore water	21	2.69902	2.78197	0.002
2024-05-27	no mat	pore water	22	2.78153	2.935	0.006
2024-05-27	no mat	pore water	23	2.71604	2.81381	0.005
2024-05-27	no mat	pore water	24	2.48551	2.60293	0.006
2024-05-27	no mat	pore water	25	2.48721	2.60689	0.005
2024-05-27	no mat	pore water	26	2.43938	2.64838	0.018
2024-05-27	no mat	pore water	27	2.44753	2.61155	0.045
2024-05-27	no mat	pore water	28	2.65613	2.79157	0.028
2024-05-27	no mat	pore water	29	2.3723	2.57007	0.072
2024-05-27	below mat	water column	41	2.178	2.518	0.001
2024-05-27	below mat	water column	42	2.633	2.748	0.0012
2024-05-27	below mat	water column	43	2.538	2.698	0.0007
2024-05-27	below mat	water column	44	2.474	2.604	0.0011
2024-05-27	below mat	water column	45	2.387	2.467	0.0018
2024-05-27	below mat	water column	46	3.154	3.241	0.0023
2024-05-27	below mat	water column	47	2.259	2.507	0.001
2024-05-27	below mat	water column	48	2.725	2.82	0.0005
2024-05-27	below mat	water column	49	3.774	3.989	0.0025
2024-05-27	below mat	water column	50	2.553	2.692	0.0013
2024-05-27	below mat	water column	51	2.491	2.618	0.0036
2024-05-27	below mat	pore water	30	2.62468	2.72725	0.045
2024-05-27	below mat	pore water	31	4.87453	4.99807	0.097
2024-05-27	below mat	pore water	32	2.91681	2.98718	0.054
2024-05-27	below mat	pore water	33	2.90592	3.06074	0.065
2024-05-27	below mat	pore water	34	4.29166	4.47838	0.134
2024-05-27	below mat	pore water	35	2.83046	3.05762	0.079
2024-05-27	below mat	pore water	36	4.255	4.60419	0.061
2024-05-27	below mat	pore water	37	4.349	4.6953	0.029
2024-05-27	below mat	pore water	38	3.0688	3.19019	0.123
2024-05-27	below mat	pore water	39	2.85028	2.99511	0.052
2024-05-27	below mat	pore water	40	4.6469	5.00763	0.0485

## Sheet: Transect
Porewater from sulfide patch transect
Date	Sample distance	DIC [mM]	TA [uEq Kg-1]	Total sulfide [mM]
2024-03-28	0	2.481	2.60715	0
2024-03-28	10	2.481	2.66085	0
2024-03-28	20	2.599	2.72134	0
2024-03-28	30	2.594	2.76203	0
2024-03-28	35	2.396	2.5744	0
2024-03-28	40	2.618	2.80144	0.0516
2024-03-28	45	2.947	3.22822	0.2112
2024-03-28	50	2.416	2.59417	0.0103
2024-03-28	55	2.278	2.57235	0
2024-03-28	60	2.336	2.5966	0
2024-03-28	70	2.332	2.60851	0
2024-03-28	80	2.275	2.55448	0
2024-03-28	90	2.478	2.67136	0
2024-03-28	100	2.25	2.54762	0
2024-05-22	0	2.27148	2.50481	0.00105282
2024-05-22	10	2.605	2.80642	0
2024-05-22	20	2.95811	3.37283	0.00052641
2024-05-22	30	3.52635	3.68241	0.000277243
2024-05-22	35	3.7348	3.78111	0.195825
2024-05-22	40	10.033	9.41382	1.98474
2024-05-22	45	8.57918	8.41844	1.68721
2024-05-22	50	11.1139	10.3409	2.06198
2024-05-22	55	3.32207	3.87197	0.140376
2024-05-22	60	2.99897	3.15252	0.163728
2024-05-22	70	2.21	2.47561	0.00533429
2024-05-22	80	2.46534	2.63587	0.00126338
2024-05-22	90	2.915	3.03628	0.145724

## Sheet: Photosynthesis rate
Sulfide vs Photosynthesis rate
Total sulfide [uM]	Photosynthesis rate
2.64734	3.375
20.9631	1.33333
0.150719	1.92308
6.94436	1.07692
0.270934	1.125
3013.12	-0.5
465.049	0.526316
537.621	0.130769
264.814	1.28571
86.0202	0.361111
7.13788	1.45455

## Sheet: TA vs DIC
TA vs DIC
Date	Measurement	TA	DIC
March 2024	water column (below mat)	2.189	2.533
		2.284	2.545
		2.209	2.556
		2.22	2.561
		2.304	2.542
		2.19	2.521
		2.279	2.564
		2.22	2.554
		2.196	2.531
		2.182	2.52339
March 2024	porewater (below mat)	3.308	3.52344
		2.523	2.64334
		2.542	2.75156
		2.79426	2.90793
		2.48326	2.73557
		2.5	2.73635
		2.383	2.56384
		3.877	4.05281
		3.642	3.93647
		3.541	4.112
March 2024	water column (no mat)	2.188	2.54022
		2.147	2.58294
		2.153	2.465
		2.147	2.512
		2.146	2.548
		2.149	2.512
		2.149	2.561
		2.142	2.514
		2.15	2.581
		2.153	2.522
March 2024	porewater (no mat)	2.374	2.46724
		2.323	2.53799
		2.498	2.64543
		2.359	2.54238
		2.386	2.55963
		2.442	2.59765
		2.459	2.601
		2.395	2.584
		2.512	2.647
		2.487	2.655
May 2024	water column (no mat)	2.173	2.492
		2.164	2.509
		2.16	2.484
		2.162	2.487
		2.164	2.491
		2.167	2.496
		2.17	2.505
		2.172	2.509
		2.175	2.513
May 2024	pore-water (no mat)	2.69902	2.78197
		2.78153	2.935
		2.71604	2.81381
		2.48551	2.60293
		2.48721	2.60689
		2.43938	2.64838
		2.44753	2.61155
		2.65613	2.79157
		2.3723	2.57007
May 2024	water column (below mat)	2.178	2.518
		2.633	2.748
		2.538	2.698
		2.474	2.604
		2.387	2.467
		3.154	3.241
		2.259	2.507
		2.725	2.82
		3.774	3.989
		2.553	2.692
		2.491	2.618
May 2024	pore-water (below mat)	2.62468	2.72725
		4.87453	4.99807
		2.91681	2.98718
		2.90592	3.06074
		4.29166	4.47838
		2.83046	3.05762
		4.255	4.60419
		4.349	4.6953
		3.0688	3.19019
		2.85028	2.99511
		4.6469	5.00763
May 2024	Porewater transect	2.481	2.60715
		2.481	2.66085
		2.599	2.72134
		2.594	2.76203
		2.396	2.5744
		2.618	2.80144
		2.947	3.22822
		2.416	2.59417
		2.278	2.57235
		2.336	2.5966
		2.332	2.60851
		2.275	2.55448
		2.478	2.67136
		2.25	2.54762
March 2024	Porewater transect	2.27148	2.50481
		2.605	2.80642
		2.95811	3.37283
		3.52635	3.68241
		3.7348	3.78111
		10.033	9.41382
		8.57918	8.41844
		11.1139	10.3409
		3.32207	3.87197
		2.99897	3.15252
		2.21	2.47561
		2.46534	2.63587
		2.915	3.03628
